# Supplementary material for: Long-term study of behaviors of two cohabiting sea urchin species, Mesocentrotus nudus and Strongylocentrotus intermedius , under conditions of high food quantity and predation risk in situ
Source: PeerJ journal article supplement (doi:10.7717/peerj.8087), 2019-11-22

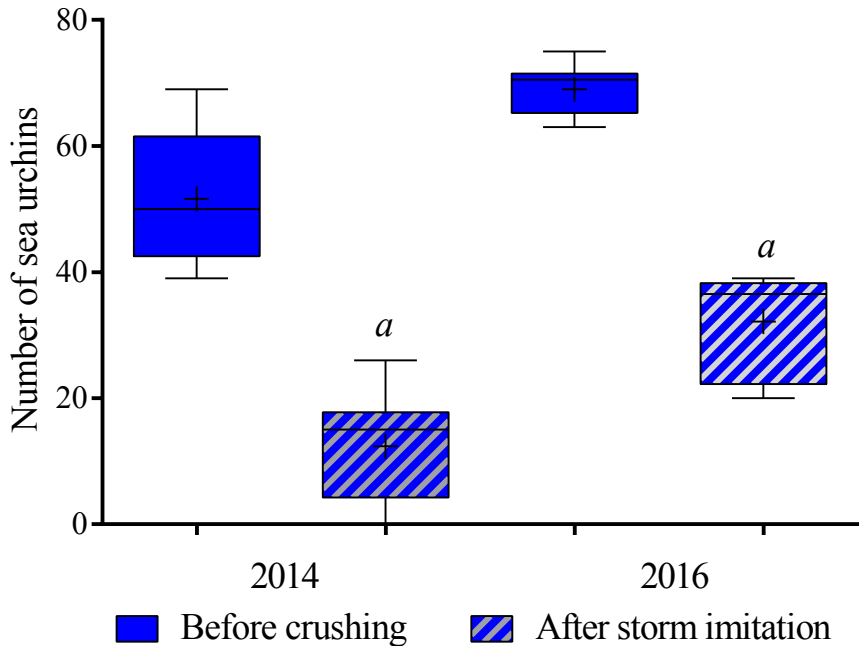

Supplement: Figure_S4.pdf [file Figure_S4.pdf]
