# Supplementary material for: Long-term study of behaviors of two cohabiting sea urchin species, Mesocentrotus nudus and Strongylocentrotus intermedius, under conditions of high food quantity and predation risk in situ
Source: PubMed Central journal article supplement (PMC6876488; doi:10.7717/peerj.8087), 2019-11-22

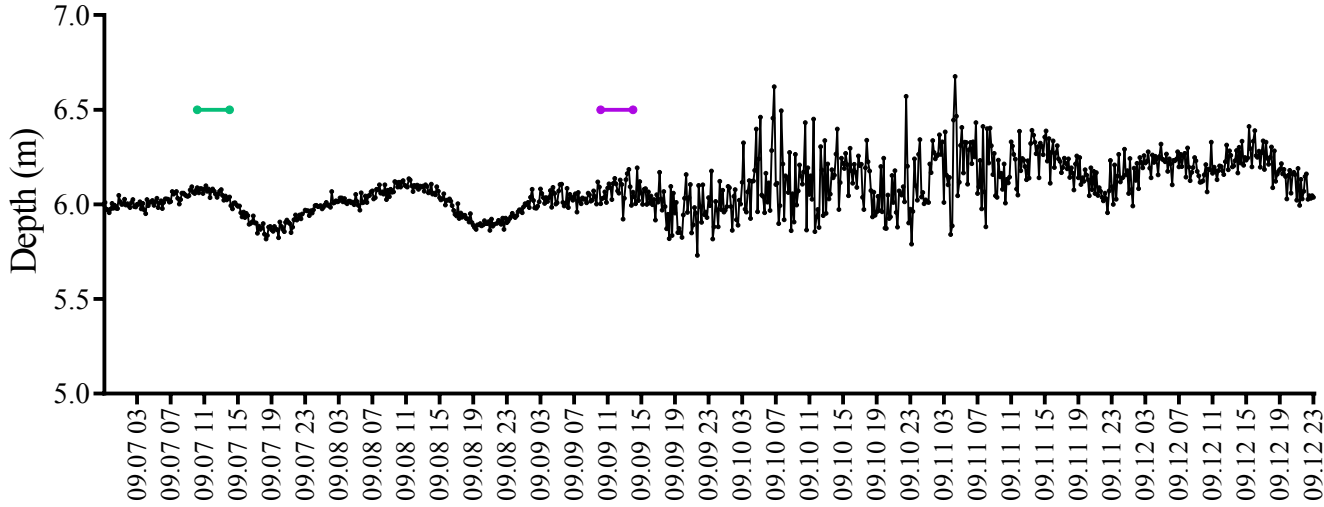

Supplement: peerj-07-8087-s019.pdf [file peerj-07-8087-s019.pdf]
