# Supplementary material for: Long-term study of behaviors of two cohabiting sea urchin species, Mesocentrotus nudus and Strongylocentrotus intermedius, under conditions of high food quantity and predation risk in situ
Source: PeerJ. 2019 Nov 22;7:e8087. doi: 10.7717/peerj.8087 (PMC6876488; doi:10.7717/peerj.8087)
Supplement: Supplemental Information 1 — ‘nd’ indicates the periods of poor visibility because of high water turbidity. [file peerj-07-8087-s001.xlsx]

## Sheet: Лист1
																					2015									2015									2016									2016
		2014											2014							Mesocentrotus nudus									Strongylocentrotus intermedius									Mesocentrotus nudus									Strongylocentrotus intermedius
		Mesocentrotus nudus										Strongylocentrotus intermedius
																			Date	Treatment	Camera 1	Camera 2	Camera 3	Camera 4	Sum			Date	Treatment	Camera 1	Camera 2	Camera 3	Camera 4	Sum			Date	Treatment	Camera 1	Camera 2	Camera 3	Camera 4	Sum			Date	Treatment	Camera 1	Camera 2
	Date	Treatment	Camera 1	Camera 2	Camera 3	Camera 4	Sum			Date	Treatment	Camera 1	Camera 2	Camera 3	Camera 4	Sum				Storm	nd	nd	nd	nd				A 27	Storm	nd	nd	nd	nd				J 31		2	0	1	5	8			J 31		3	5
	A 01		3	4	5	6	18			A 01		2	5	1	3	11			A 27	Storm	nd	nd	nd	nd					Storm	nd	nd	nd	nd						5	1	6	5	17					3	4
			5	4	5	7	21					4	6	3	8	21				Storm	nd	nd	nd	nd					Storm	nd	nd	nd	nd						5	6	6	5	22					3	5
			5	5	5	7	22					6	6	5	9	26				Storm	nd	nd	nd	nd					Storm	nd	nd	nd	nd						7	8	6	6	27					4	6
			4	4	6	7	21					8	6	5	9	28				Storm	nd	nd	nd	nd				A 28	Storm	nd	nd	nd	nd				A 01		9	8	6	8	31			A 01		5	6
	A 02		7	4	6	7	24			A 02		12	7	7	10	36			A 28	Storm	nd	nd	nd	nd					Storm	nd	nd	nd	nd						9	10	7	8	34					7	6
			7	5	7	9	28					13	9	9	13	44				Storm	nd	nd	nd	nd					Storm	nd	nd	nd	nd						11	9	8	8	36					11	9
			8	4	8	9	29					13	9	11	15	48					1	3	5	6	15					23	30	10	12	75					10	9	9	9	37					16	8
			8	5	8	9	30					17	10	13	15	55					3	3	7	8	21			A 29		28	33	17	22	100			A 02		12	8	9	10	39			A 02		16	8
	A 03		12	9	16	13	50			A 03		17	12	16	15	60			A 29		5	6	11	13	35					30	32	19	19	100					13	12	9	11	45					15	8
			12	9	13	18	52					15	12	15	15	57					5	9	14	15	43					42	45	27	28	142					13	14	9	13	49					11	10
			8	8	17	16	49					17	12	16	16	61					3	5	11	13	32					39	40	23	19	121					14	17	11	17	59					11	13
			7	8	13	18	46					16	12	16	16	60					5	7	12	14	38			A 30		39	40	23	27	129			A 03		13	20	11	18	62			A 03		9	12
	A 04		5	7	15	19	46			A 04		15	11	16	16	58			A 30		4	6	15	18	43					38	37	19	20	114					13	18	11	18	60					10	12
			9	6	15	15	45					14	11	15	16	56					4	7	16	19	46					38	39	22	27	126					14	19	12	20	65					10	11
			4	7	14	18	43					13	9	13	14	49					4	7	13	19	43					40	43	20	27	130					11	17	9	23	60					12	14
		Storm	5	5	11	15	36				Storm	7	4	5	5	21					5	5	17	22	49			A 31		39	40	20	28	127			A 04		10	19	11	21	61			A 04		12	13
	A 05	Storm	nd	nd	nd	nd				A 05	Storm	nd	nd	nd	nd				A 31		3	4	17	18	42					41	42	20	28	131					7	17	11	19	54					9	10
		Storm	nd	nd	nd	nd					Storm	nd	nd	nd	nd						3	3	16	17	39					43	42	18	27	130				Storm	6	8	3	9	26				Storm	9	8
		Storm	nd	nd	nd	nd					Storm	nd	nd	nd	nd						3	4	18	18	43					46	45	19	27	137				Storm	1	3	0	3	7				Storm	6	4
		Storm	nd	nd	nd	nd					Storm	nd	nd	nd	nd						2	4	15	19	40			S 01		26	31	18	22	97			A 05	Storm	nd	nd	nd	nd				A 05	Storm	4	2
	A 06	Storm	nd	nd	nd	nd				A 06	Storm	nd	nd	nd	nd				S 01		2	4	15	18	39					25	30	19	21	95				Storm	nd	nd	nd	nd					Storm	nd	nd
		Storm	nd	nd	nd	nd					Storm	nd	nd	nd	nd					Removing	0	0	0	0	0					39	32	18	23	112				Storm	nd	nd	nd	nd					Storm	nd	nd
		Storm	0	0	3	0	3				Storm	nd	nd	nd	nd						0	0	3	4	7					46	42	20	21	129				Storm	nd	nd	nd	nd					Storm	nd	nd
			5	1	5	7	18					12	16	15	17	60					3	2	11	15	31			S 02		43	41	16	18	118			A 06	Storm	nd	nd	nd	nd				A 06	Storm	nd	nd
	A 07		5	3	6	7	21			A 07		11	16	15	17	59			S 02		3	2	13	15	33					40	33	17	23	113				Storm	3	2	1	5	11				Storm	nd	nd
			3	3	6	10	22					11	13	15	16	55					3	3	13	15	34					31	31	18	16	96					9	13	11	12	45					8	4
			3	3	6	9	21					13	15	14	20	62					4	7	15	17	43					37	35	19	20	111					9	16	11	16	52					11	7
			3	3	7	11	24					13	15	14	20	62					6	7	14	20	47			S 03		42	45	23	26	136			A 07		10	16	11	17	54			A 07		12	9
	A 08		3	4	7	14	28			A 08		15	17	18	19	69			S 03		5	6	14	19	44					35	34	17	16	102					13	13	10	16	52					14	8
			3	4	9	13	29					14	14	16	20	64					5	6	17	19	47					38	44	21	27	130					16	15	12	16	59					15	10
			2	5	9	14	30					15	14	18	20	67					5	6	17	19	47					42	46	19	23	130					14	15	11	14	54					15	12
			8	5	8	10	31					15	14	19	19	67					5	6	18	20	49			S 04		41	47	19	23	130			A 08		14	13	13	15	55			A 08		16	15
	A 09		5	7	10	15	37			A 09		15	13	19	19	66			S 04		5	6	18	20	49					39	46	17	21	123					11	11	15	15	52					14	15
			5	7	13	15	40					14	13	19	19	65					6	6	18	20	50					42	45	18	24	129					10	13	16	13	52					13	11
			7	8	11	13	39					11	9	17	17	54					6	6	18	20	50					46	44	22	29	141					10	13	16	14	53					13	14
		Removing	0	0	0	0	0					12	9	17	17	55					1	7	20	22	50			S 05		45	44	21	29	139			A 09		11	12	15	16	54			A 09		10	15
	A 10		2	0	0	0	2			A 10		11	10	16	22	59			S 05		0	7	19	20	46					49	46	23	25	143					11	10	17	17	55					10	14
			2	0	0	0	2					10	10	15	22	57					2	6	18	23	49					50	42	17	12	121					9	9	20	16	54					11	14
		Storm	1	0	0	0	1				Storm	11	14	14	20	59					2	8	22	22	54				Starfish attack	48	42	22	16	128					9	10	21	14	54					9	17
		Storm	1	0	0	0	1				Storm	11	14	14	20	59					2	8	24	26	60			S 06	Starfish attack	40	42	19	14	115			A 10		8	11	22	12	53			A 10		9	16
	A 11	Storm	0	0	0	0	0			A 11	Storm	8	9	17	21	55			S 06		2	9	24	26	61				Starfish attack	35	30	19	20	104					8	12	21	12	53					12	19
		Storm	0	0	0	0	0				Storm	4	10	11	12	37				Removing	0	0	0	0	0				Starfish attack	32	27	23	25	107					11	13	19	15	58					11	17
		Storm	1	1	0	0	2				Storm	5	9	8	5	27					2	0	2	3	7				Starfish attack	30	29	24	25	108					9	11	22	13	55					8	13
		Storm	1	2	1	0	4				Storm	5	8	7	8	28					2	2	4	6	14			S 07	Starfish attack	28	30	26	24	108			A 11		8	10	23	11	52			A 11		8	14
	A 12	Storm	2	2	1	0	5			A 12	Storm	11	9	10	19	49			S 07		2	4	11	9	26				Starfish attack	15	33	29	25	102				Storm	5	8	14	5	32				Storm	9	16
		Storm	2	2	1	0	5				Storm	12	8	9	20	49					2	2	7	36	47				Starfish attack	12	35	29	28	104				Storm	5	5	12	11	33				Storm	6	13
		Storm	2	2	1	1	6				Storm	13	7	7	18	45					3	2	11	34	50				Starfish attack	10	42	26	25	103				Storm	4	3	10	6	23				Storm	4	7
		Storm	2	2	0	1	5				Storm	13	7	7	13	40					4	2	13	36	55			S 08	Starfish attack	12	45	28	31	116			A 12	Storm	4	3	10	5	22			A 12	Storm	1	4
	A 13		3	2	1	5	11			A 13		15	6	7	13	41			S 08		5	3	12	33	53				Starfish attack	14	41	23	37	115				Storm	5	6	9	5	25				Storm	0	3
			3	2	2	6	13					19	9	8	16	52					7	10	17	37	71				Starfish attack	12	42	21	38	113				Storm	5	7	6	8	26				Storm	0	4
			5	3	2	6	16					21	9	8	17	55					8	9	14	35	66				Starfish attack	11	46	29	35	121				Storm	9	10	8	10	37				Storm	6	8
			5	3	4	6	18					21	11	9	17	58					8	5	12	28	53			S 09		18	44	23	30	115			A 13	Storm	12	11	13	16	52			A 13	Storm	12	9
	A 14		8	5	6	8	27			A 14		20	12	8	15	55			S 09		11	3	5	13	32					44	41	20	28	133					13	11	14	17	55					10	12
			8	7	9	8	32					21	13	8	15	57				Storm	2	0	2	2	6				Storm	25	16	12	22	75					16	9	7	16	48					10	11
		Removing	0	0	0	0	0					23	13	9	15	60				Storm	0	0	0	3	3				Storm	15	16	11	4	46					19	9	8	19	55					11	14
			0	0	0	0	0					24	12	11	16	63				Storm	nd	nd	nd	nd				S 10	Storm + starfish attack	nd	nd	nd	nd				A 14		18	10	8	21	57			A 14		11	14
	A 15		0	1	0	0	1			A 15		25	12	11	16	64			S 10	Storm	nd	nd	nd	nd					Storm	nd	nd	nd	nd						15	10	11	22	58					9	15
			0	2	0	0	2					20	10	11	14	55				Storm	nd	nd	nd	nd					Storm	nd	nd	nd	nd						17	11	13	22	63					9	17
			0	2	0	0	2					20	11	12	18	61				Storm	nd	nd	nd	nd					Storm	nd	nd	nd	nd						16	15	14	20	65					10	17
			0	2	0	0	2					20	11	12	18	61				Storm	nd	nd	nd	nd				S 11	Storm	nd	nd	nd	nd				A 15		13	16	14	20	63			A 15		10	17
	A 16		2	2	4	5	13			A 16		18	9	11	17	55			S 11	Storm	0	0	3	6	9				Storm	15	14	8	12	49					15	16	12	21	64					11	15
			7	9	8	9	33					22	10	13	21	66					6	9	16	37	68					28	26	16	17	87					17	12	18	18	65					9	15
			6	9	8	9	32					23	9	11	20	63					7	10	21	36	74					27	23	15	19	84					19	13	16	17	65					9	15
			7	9	8	9	33					23	9	10	19	61				Crushing	0	0	0	3	3			S 12		36	43	27	20	126			A 16		20	12	15	19	66			A 16		11	14
	A 17		7	9	6	9	31			A 17		22	9	10	18	59			S 12		0	0	0	1	1					30	38	26	21	115					21	13	14	22	70					8	17
			9	9	7	9	34					21	11	11	17	60					0	0	0	0	0					32	42	27	25	126					18	11	19	18	66					9	18
			8	9	12	17	46					23	12	12	17	64					0	0	0	0	0					32	41	24	28	125					18	10	14	17	59					7	15
			7	9	11	19	46					23	12	12	17	64					0	0	0	0	0			S 13		34	42	24	25	125			A 17		15	13	18	16	62			A 17		7	13
	A 18		10	10	14	18	52			A 18		20	13	11	18	62			S 13		0	0	0	0	0					41	40	18	24	123					15	12	20	16	63					7	12
			9	10	14	19	52					21	14	12	18	65					0	0	0	0	0					47	49	25	29	150					20	10	21	14	65					6	11
			10	10	14	20	54					20	14	13	16	63					0	0	0	0	0					51	44	27	30	152					20	10	21	14	65					8	10
			8	11	17	19	55					20	14	13	16	63					0	0	0	0	0			S 14		46	43	24	24	137			A 18		19	12	22	13	66			A 18		10	12
	A 19		7	9	19	19	54			A 19		19	11	14	18	62			S 14		0	0	0	0	0					48	40	26	26	140					18	10	19	17	64					12	11
		Removing	0	0	0	0	0					20	10	13	15	58					0	0	0	0	0					53	56	23	27	159					17	9	21	18	65					12	13
			0	0	0	0	0					22	15	10	19	66					0	0	0	0	0					55	59	29	27	170					18	8	19	20	65					11	13
			2	2	0	4	8					23	17	9	20	69					0	0	0	0	0			S 15		53	59	23	28	163			A 19		21	10	20	15	66			A 19		13	16
	A 20		5	3	4	5	17			A 20		24	17	11	18	70			S 15		0	0	0	0	0					50	58	23	27	158					20	11	20	16	67					14	17
			3	4	4	8	19					25	16	12	18	71					0	0	0	0	0					47	59	23	29	158					19	12	19	17	67					15	18
			3	5	5	10	23					24	13	13	18	68					0	0	0	0	0					43	58	22	22	145					23	14	17	16	70					12	15
			4	5	7	10	26					22	12	11	20	65					0	0	0	0	0			S 16		41	58	22	23	144			A 20		23	13	20	15	71			A 20		13	17
	A 21		4	5	7	12	28			A 21		21	11	12	21	65			S 16		0	0	0	0	0					48	60	23	26	157					22	10	23	18	73					13	19
			10	9	7	13	39					19	10	13	21	63					0	0	0	0	0					51	56	21	24	152					20	11	20	17	68					14	17
			9	4	16	16	45					18	10	14	19	61					0	0	0	0	0					53	59	22	25	159				Removing	0	0	0	0	0					10	16
			10	12	9	18	49					19	11	14	20	64					0	0	0	0	0			S 17		57	58	24	26	165			A 21		6	3	1	4	14			A 21		10	16
	A 22		13	15	14	21	63			A 22		17	9	11	16	53			S 17		0	0	0	0	0					59	58	22	28	167					8	5	9	9	31					13	17
			12	11	18	21	62					19	9	10	18	56					0	0	0	0	0					61	60	28	30	179				Storm	8	5	9	9	31				Storm	10	15
			13	12	18	24	67					15	8	9	17	49					0	0	0	0	0					62	64	27	25	178				Storm	11	9	12	10	42				Storm	7	14
		Storm	13	14	17	22	66				Storm	13	7	8	12	40					0	0	0	0	0			S 18		nd	nd	nd	nd				A 22	Storm	11	8	12	10	41			A 22	Storm	6	9
	A 23	Storm	7	8	7	12	34			A 23	Storm	12	9	7	15	43			S 18		nd	nd	nd	nd						nd	nd	nd	nd					Storm	15	8	15	11	49				Storm	6	9
		Storm	7	9	11	17	44				Storm	11	8	9	11	39					nd	nd	nd	nd						63	61	28	27	179				Storm	14	7	11	8	40				Storm	11	12
		Storm	6	4	5	8	23				Storm	11	8	9	11	39					0	0	0	0	0					67	64	31	32	194				Storm	14	7	12	10	43				Storm	10	12
		Storm	5	5	8	8	26				Storm	12	8	9	12	41					0	0	0	0	0			S 19		68	65	28	33	194			A 23		11	9	9	10	39			A 23		8	10
	A 24	Storm	11	12	15	16	54			A 24	Storm	19	11	13	19	62			S 19		0	0	0	0	0					64	63	27	35	189					11	5	9	14	39					10	10
			11	12	11	14	48					20	14	12	17	63					0	0	0	0	0					65	63	28	33	189					11	6	8	16	41					9	11
			10	13	15	15	53					20	14	12	17	63					0	0	0	0	0					61	59	24	28	172					18	11	12	21	62					7	9
			11	10	12	11	44					19	15	14	14	62					0	0	0	0	0			S 20		64	57	22	29	172			A 24		19	11	12	21	63			A 24		8	12
	A 25		14	16	14	21	65			A 25		19	15	15	17	66			S 20		0	0	0	0	0					72	64	28	32	196					18	10	13	22	63					11	11
			13	15	20	26	74					21	17	16	13	67					0	0	0	0	0					71	63	30	28	192					21	10	14	21	66					8	13
		Removing	0	0	0	0	0					23	16	16	15	70					0	0	1	0	1					67	63	26	27	183					20	12	16	19	67					9	16
			7	5	6	6	24					23	15	15	16	69					0	0	0	2	2			S 21		65	65	23	21	174			A 25		19	15	18	18	70			A 25		7	17
	A 26		11	7	9	11	38			A 26		22	15	15	18	70			S 21		0	0	0	2	2					63	66	20	20	169					17	18	21	15	71					7	17
			12	9	11	14	46					22	14	14	18	68					0	0	1	1	2					62	70	23	26	181					17	21	20	15	73					9	16
			12	13	18	8	51					20	14	10	15	59					0	0	2	0	2				Starfish attack	62	69	20	25	176					16	20	19	16	71					6	13
			11	12	15	16	54					23	13	13	16	65					0	0	2	0	2			S 22	Starfish attack	57	65	21	24	167			A 26		16	22	21	16	75			A 26		6	12
	A 27		11	14	15	17	57			A 27		23	15	15	14	67			S 22		0	0	1	0	1				Starfish attack	60	61	23	29	173					14	19	22	16	71					8	12
			15	17	14	20	66					16	13	12	11	52					0	0	1	1	2				Starfish attack	57	60	24	29	170				Crushing	0	0	2	0	2					8	13
			14	15	13	21	63					15	12	15	13	55					0	0	1	1	2				Starfish attack	56	64	23	30	173					0	0	2	0	2					7	11
			11	14	12	16	53					14	12	17	12	55					0	0	0	1	1			S 23	Starfish attack	48	54	26	31	159			A 27		0	0	0	1	1			A 27		6	10
	A 28		10	13	15	22	60			A 28		16	17	21	11	65			S 23		0	0	0	0	0				Starfish attack	46	55	24	27	152					0	0	0	0	0					11	11
		Crushing	3	1	1	2	7					15	19	21	14	69					0	0	0	1	1				Starfish attack	34	57	29	25	145					0	0	0	0	0					10	10
			1	0	0	0	1					13	18	19	13	63					0	0	0	0	0				Starfish attack	34	59	29	31	153					0	0	0	0	0					9	9
			0	0	0	0	0					15	17	22	18	72					0	0	0	0	0			S 24	Starfish attack	35	60	28	29	152			A 28		0	0	0	0	0			A 28		10	11
	A 29		0	0	0	0	0			A 29		13	17	21	19	70			S 24		0	0	0	0	0				Starfish attack	35	59	28	31	153					0	0	0	0	0					11	14
			0	0	0	0	0					13	19	22	19	73					0	0	0	0	0				Starfish attack	34	52	35	34	155					0	1	0	0	1					10	12
			1	0	0	0	1					11	18	22	20	71					0	0	0	0	0				Starfish attack	32	45	36	35	148					0	1	0	0	1					8	12
			1	0	0	0	1					10	19	24	17	70					0	0	0	0	0			S 25	Starfish attack	33	43	40	29	145			A 29		0	1	1	0	2			A 29		7	14
	A 30		0	0	0	0	0			A 30		11	17	20	19	67			S 25		0	0	0	0	0					41	51	44	45	181					0	0	0	0	0					7	17
			1	0	0	0	1					15	18	25	15	73					0	0	0	0	0					43	50	47	44	184					0	0	0	0	0					9	18
			1	0	0	0	1					15	20	23	17	75					0	0	0	0	0					44	51	45	36	176					0	0	0	0	0					10	15
			1	0	0	0	1					14	20	23	18	75					0	0	0	0	0			S 26		39	48	48	34	169			A 30		0	0	0	0	0			A 30		11	16
	A 31		0	0	0	0	0			A 31		13	21	22	18	74			S 26		0	0	0	0	0					40	47	48	34	169					0	0	0	0	0					11	16
			0	0	0	0	0					15	19	24	19	77					0	0	0	0	0					48	46	45	35	174					0	0	0	0	0					9	15
			0	0	0	0	0					11	18	25	20	74					0	0	0	0	0					49	45	48	34	176					0	0	0	0	0					12	15
			0	0	0	0	0					13	17	22	19	71					0	0	0	0	0			S 27		44	47	46	32	169			A 31		0	0	0	0	0			A 31		13	13
	S 01		0	0	0	0	0			S 01		10	15	20	19	64			S 27		0	0	0	0	0					43	47	46	32	168					0	0	0	0	0					9	17
			0	0	0	0	0					10	18	17	15	60					0	0	0	1	1					41	46	44	38	169					0	0	0	0	0					9	18
			0	1	0	0	1					10	18	17	15	60					0	0	0	0	0					39	44	41	42	166					0	0	0	0	0					7	14
			0	1	0	0	1					9	19	18	15	61					0	0	0	1	1			S 28		38	43	39	39	159			S 01		0	0	0	0	0			S 01		6	15
	S 02		0	0	0	0	0			S 02		12	17	17	19	65			S 28		0	0	0	0	0					40	42	44	40	166					0	0	0	0	0					9	16
			0	1	0	0	1					13	16	16	19	64					0	0	0	1	1					40	42	42	40	164					0	0	0	0	0					11	12
			0	1	0	0	1					11	17	18	17	63					0	0	0	1	1					35	37	37	35	144					0	0	0	0	0					13	11
			0	1	0	0	1					11	17	18	17	63					0	0	0	2	2			S 29		42	41	38	38	159			S 02		0	0	0	0	0			S 02		14	10
	S 03		0	0	0	0	0			S 03		12	14	19	17	62			S 29		0	0	0	0	0					37	35	36	36	144					0	0	0	0	0					19	11
			0	0	0	0	0					10	13	16	18	57					0	0	0	1	1					40	43	39	36	158					0	0	0	0	0					18	10
			0	0	0	0	0					9	14	16	18	57					0	0	0	0	0					42	36	35	41	154					0	0	0	0	0					16	9
		Storm	0	0	0	0	0				Storm	9	14	18	14	55					0	0	0	0	0			S 30		37	33	37	35	142			S 03		0	0	0	0	0			S 03		17	10
	S 04	Storm	0	0	0	0	0			S 04	Storm	4	2	2	3	11			S 30	Storm	0	0	0	0	0				Storm	19	23	30	28	100					0	0	0	0	0					18	9
		Storm	0	0	0	0	0				Storm	1	1	2	3	7				Storm	0	0	0	0	0				Storm	8	6	4	17	35					0	0	0	0	0					18	9
		Storm	0	0	0	0	0				Storm	0	0	2	3	5				Storm	0	0	0	0	0				Storm	5	6	3	15	29					0	0	0	0	0					15	8
		Storm	0	0	0	0	0				Storm	3	3	2	1	9				Storm	0	0	0	0	0			O 01	Storm	5	10	7	17	39			S 04		0	0	0	0	0			S 04		21	11
	S 05	Storm	0	0	0	0	0			S 05	Storm	3	4	5	2	14			O 01	Storm	0	0	0	3	3				Storm	11	12	17	26	66					0	0	0	0	0					22	10
		Storm	0	2	0	0	2				Storm	5	4	6	2	17					2	2	6	10	20					29	31	34	31	125					0	0	0	0	0					22	10
		Storm	0	0	0	0	0				Storm	5	4	6	3	18					5	2	16	22	45					39	32	37	37	145					0	0	0	0	0					20	11
		Storm	0	0	0	0	0				Storm	5	4	6	6	21					7	10	20	34	71			O 02		39	32	41	35	147			S 05		0	0	0	0	0			S 05		21	11
	S 06	Storm	0	0	0	0	0			S 06	Storm	7	5	14	7	33			O 02		9	10	21	35	75					47	30	43	33	153					0	0	0	0	0					25	12
		Storm	1	3	3	1	8				Storm	15	15	17	12	59					8	9	20	36	73					48	36	40	36	160					0	0	0	0	0					23	12
			1	3	3	3	10					15	17	19	13	64																							0	0	0	0	0					21	13
			2	3	4	4	13					14	17	20	12	63																					S 06		0	0	0	0	0			S 06		19	12
	S 07		9	10	11	9	39			S 07		14	19	19	12	64																							0	0	0	0	0					18	11
			10	8	11	17	46					13	20	19	11	63																							0	0	1	0	1					17	10
			11	9	12	18	50					13	21	18	13	65																							1	1	0	0	2					20	13
			11	12	11	20	54					12	20	21	13	66																					S 07		0	1	0	0	1			S 07		21	13
	S 08		10	17	19	23	69			S 08		13	22	20	13	68																							0	1	0	0	1					20	15
		Crushing	0	0	0	4	4					15	21	21	15	72																							0	1	0	0	1					24	16
			0	0	0	2	2					14	20	19	16	69																							0	0	0	0	0					19	14
			0	0	1	2	3					12	20	19	13	64																					S 08		0	0	0	0	0			S 08		20	15
	S 09		0	0	0	0	0			S 09		13	20	21	15	69																							0	0	0	0	0					20	14
			0	0	0	0	0					17	22	19	12	70																							0	0	0	0	0					23	18
			0	0	0	0	0					15	21	20	13	69																							0	0	0	0	0					19	15
			0	0	0	0	0					15	21	19	14	69																					S 09		0	0	0	0	0			S 09		20	15
	S 11		0	0	0	0	0			S 11		14	22	20	15	71																						Storm imitation and the change of the feeders									Storm imitation and the change of the feeders
			0	0	0	0	0					13	20	20	16	69																							0	0	0	0	0					20	15
			0	0	0	0	0					15	23	21	14	73																							3	2	4	11	20					17	11
			0	0	0	0	0					12	20	22	15	69																					S 10		5	2	4	12	23			S 10		18	11
	S 11		0	0	0	0	0			S 11		13	21	21	17	72																							7	3	14	12	36					17	10
			0	0	0	0	0					15	19	18	17	69																							8	5	14	12	39					17	10
			0	0	0	0	0					10	22	17	16	65																							11	5	10	12	38					21	11
			0	0	0	0	0					10	22	17	18	67																					S 11		10	6	10	11	37			S 11		22	11
	S 12		1	0	0	0	1			S 12		13	23	19	17	72																						Storm	nd	nd	nd	nd					Storm	nd	nd
			1	0	0	0	1					12	20	18	20	70																						Storm	nd	nd	nd	nd					Storm	nd	nd
			1	0	0	0	1					12	21	19	21	73																						Storm	nd	nd	nd	nd					Storm	nd	nd
			0	1	0	0	1					13	21	20	21	75																					S 12	Storm	nd	nd	nd	nd				S 12	Storm	nd	nd
	S 13		2	1	0	0	3			S 13		13	19	22	22	76																						Storm	nd	nd	nd	nd					Storm	nd	nd
			2	1	0	0	3					11	17	21	19	68																						Storm	nd	nd	nd	nd					Storm	nd	nd
		Storm imitation and the change of the feeders									Storm imitation and the change of the feeders																											Storm	nd	nd	nd	nd					Storm	nd	nd
			0	0	0	0	0					11	17	21	19	68																					S 13	Storm	nd	nd	nd	nd				S 13	Storm	nd	nd
	S 14		0	0	0	0	0			S 14		15	17	22	20	74																						Storm	nd	nd	nd	nd					Storm	nd	nd
			1	1	0	0	2					16	16	20	23	75																						Storm	nd	nd	nd	nd					Storm	nd	nd
			2	1	0	2	5					17	17	21	21	76																						Storm	nd	nd	nd	nd					Storm	nd	nd
			2	2	0	2	6					19	17	22	21	79																					S 14	Storm	nd	nd	nd	nd				S 14	Storm	nd	nd
	S 15		5	3	1	5	14			S 15		15	15	21	22	73
			6	4	1	5	16					15	14	17	19	65
			6	4	1	5	16					17	18	16	17	68
			5	5	3	3	16					17	18	16	17	68
	S 16		7	8	6	5	26			S 16		16	13	19	15	63
			5	7	6	5	23					15	19	19	14	67
		Crushing	1	2	0	0	3					13	17	18	13	61
			1	1	0	0	2					13	19	19	14	65
	S 17		0	1	0	0	1			S 17		13	18	20	13	64
			0	0	0	0	0					12	18	18	14	62
			0	0	0	0	0					11	19	17	15	62
			0	0	0	0	0					15	21	23	14	73
	S 18		0	1	0	0	1			S 18		16	20	23	16	75
			0	1	0	0	1					15	22	24	15	76
			0	1	0	0	1					12	19	23	19	73
			0	1	0	0	1					16	22	24	17	79
	S 19		0	0	0	0	0			S 19		13	19	20	17	69
			0	0	0	0	0					14	21	23	16	74
			0	0	0	0	0					13	22	20	16	71
			0	0	0	0	0					13	23	21	16	73
	S 20		0	0	0	0	0			S 20		14	21	19	18	72
			0	0	0	0	0					14	19	18	19	70
			0	0	0	0	0					13	19	17	20	69
			0	0	0	0	0					17	20	19	19	75
	S 21		0	0	0	0	0			S 21		14	17	18	15	64
			0	0	0	0	0					13	19	19	17	68
			0	0	0	0	0					13	18	19	18	68
			0	0	0	0	0					13	17	19	18	67
	S 22		0	0	0	0	0			S 22
[truncated: 3 more columns]
