# Supplementary material for: Long-term study of behaviors of two cohabiting sea urchin species, Mesocentrotus nudus and Strongylocentrotus intermedius, under conditions of high food quantity and predation risk in situ
Source: PeerJ. 2019 Nov 22;7:e8087. doi: 10.7717/peerj.8087 (PMC6876488; doi:10.7717/peerj.8087)
Supplement: Supplemental Information 2 — (A) The distances (cm) traveled by sea urchins M. nudus during 240 min under conditions of calm weather. (B) The distances (cm) traveled by sea urchins M. nudus during 240 min under conditions of stormy weather. (C) The distances (cm) traveled by sea urchins M. nudus during escape under conditions of stormy weather. [file peerj-07-8087-s002.xlsx]

## Sheet: Лист1
	(A)													(B)												(C)
Time, min	M. nud. 1	M. nud. 2	M. nud. 3	M. nud. 4	M. nud. 5	M. nud. 6	M. nud. 7	M. nud. 8	M. nud. 9	M. nud. 10			Time, min	M. nud. 1	M. nud. 2	M. nud. 3	M. nud. 4	M. nud. 5	M. nud. 6	M. nud. 7	M. nud. 8	M. nud. 9	M. nud. 10			Time, min	M. nud. 3	Time, min	M. nud. 4	Time, min	M. nud. 5	Time, min	M. nud. 6	Time, min	M. nud. 7
1	0	0	0	0.1	0.223607	0.1	0	0.167	0	0.824621			1	0.28	0.2	0.3	0	0	0	0	0.2	0.3	0.2			248	2.00997	241	3.26497	263	1.23206	341	4.60109	254	1.15566
2	0	0	0	1.10454	0.447214	0.509902	0.316228	0.194651	0	0			2	0.3	0.14	0	0	0	0	0	0.5	0.1	0.2			249	0.8	242	3.4176	264	0.766791	342	0.1	255	0
3	0	0.2	0.860233	0.806226	0.223607	0	0.141421	0	0	0.2			3	0.22	0	0	0	0.42	0	0	0.762	0.1	0			250	1.40357	243	1.52643	265	1.10927	343	0.2	256	0.943315
4	0	0.781025	0.8544	0.412311	0.2	0	0.5	0.167	0	0.7			4	0	0	0	0	0	0	0	0.3	0.1	0.1			251	3.49285	244	0.509902	266	0.3	344	0	257	1.66508
5	0	2.91548	0.282843	0.4	0	0	0.2	0.261197	0	0.3			5	0	0	0	0	0	0	0	0	0.1	0			252	4.45533	245	3.10644	267	0.948683	345	0	258	0.886316
6	0	0.583095	2.80179	0.5	0.1	0.3	0	0.167	0	0.1			6	0	0.14	0	0	0	0	0	0	0.1	0.2			253	9.0802	246	3.50571	268	0	346	0	259	1.01973
7	0	2.5632	2.5318	0.989949	0.1	0	0	0.100005	0	0.141421			7	0	0	0	0	0	0	0	0	0.141	0.224			254	6.81175	247	5.30848	269	3.23828	347	0	260	0.521
8	0	0.447214	0.509902	2.03961	0.447214	0	0	0.193794	0	0.4			8	0	0	0	0	0	0	0	0	0.424	0.141			255	7.26911	248	0.608276	270	2.29997	348	0	261	1.41537
9	0	0.824621	0	1.1	0.4	0	0	0.312083	0	0.223607			9	0	0	0.54	0	0	0	0	0	0.316	0			256	2.84253	249	1.74642	271	1.89356	349	0	262	1.5879
10	0	0.761577	0.565685	0.806226	0.3	0	0	0.270187	0	0.223607			10	0	0	0.4	0	0.31	0	0	0	0.283	0			257	0.1	250	0.8544	272	1.75825	350	1.52643	263	2.02434
11	0	1.71172	1.48661	0.921954	0.1	0	0	0.333	0	0.921954			11	0	0	0	0.1	0	0	0	0	0.424	0.1			258	0.5	251	2.68328	273	3.68693	351	0.223607	264	1.68269
12	0	1.39284	1.78885	0.728011	0.6	0	0.223607	0.217313	0.509902	0.9			12	0	0	0	0	0	0	0.31	0	0.141	0.762			259	0	252	2.02485	274	3.17792	352	0	265	0.317515
13	0	0.223607	0.483364	0.447214	0	0	0	0.1	0	0.6			13	0	0	0.2	0	0	0	0	0	0.283	0.1			260	0.1	253	2.77849	275	3.23342	353	0	266	0.144278
14	0.316228	2.41868	0	0.360555	0.565685	1.50333	0	0.259278	0.509902	0.3			14	0	0	0.1	0	0	0	0	0	0.141	0			261	1.84391	254	3.68782	276	3.044	354	0	267	0.428823
15	0.223607	0.640312	0.730677	0.1	0.3	1.04403	0	0.1	0	0.3			15	0	0.2	0.1	0	0	0	0	0	0.2	0			262	0.2	255	3.10161			355	0	268	0.6
16	0	0.905539	0.25	0	0.4	0	0	0.560817	0	0.5			16	0	0.2	0	0	0	0	0	0.1	0.224	0.224			263	0	256	2.77309			356	0	269	0.417
17	0.412311	0	0	0	0.4	0	0	0.409141	0	0.3			17	0	0	1.34	0	0	0	0	0	0.2	0			264	0	257	1.58114			357	0	270	1.60338
18	0.3	0.412311	0.334	0	1.27279	0.728011	0	0	0	0.6			18	0	0	0	0	0	0	0	0	0.412	0			265	0.5	258	1.08167			358	0	271	11.8115
19	0.223607	0.223607	1.28487	0	0.447214	0.1	0	0.1	0	0.447214			19	0	0	0.1	0.1	0	0	0	0	0.316	0			266	0	259	0.5			359	0	272	4.98792
20	0.316228	0.141421	1.58047	0	0.4	0.360555	0	0.1	0	0.5			20	0	0	0	0	0	0	0	0	0	0			267	0	260	1.1			360	0	273	2.61865
21	0	0.3	1.24494	0	0.424264	1.14017	0	0.166	0	0.360555			21	0	0	0	0	0	0	0.2	0	0.447	0			268	1.65529	261	1.40357			361	1.07703	274	7.37537
22	0	0	3.77634	0	0	3.42053	0	0	0	0.4			22	0	0	0	0	0	0	0	0	0.2	0			269	3.94462	262	1.3			362	0	275	1.5658
23	0.1	0.223607	0.348649	0	0.8	0.707107	2.36009	0.26833	0	0.2			23	0	0	0	1.14	0	0	0.8	0	0.4	0			270	3.29848	263	2.5318			363	0	276	3.19531
24	0.3	0	0.166	0.141421	0.447214	0	0.424264	0.1	0	0			24	0	0	0	0	0	0	0	0	0.2	0			271	2.2561	264	1.11803			364	0.2	277	1.7
25	0	0	0.311538	0	0.2	0	0.3	0.400011	0	0.316228			25	0	0	0.1	0	0	0	0	0	0.3	0.141			272	1.74642	265	0.4			365	0	278	4.03113
26	0	0	0.915363	0	0.1	0	0	0.260555	0	0.3			26	0	0	0	0.22	0	0	0	0	0.583	0			273	1.16619	266	3.48855			366	0	279	3.49285
27	0	0.509902	0.348649	0	0.5	0	0	0.267402	0	0.5			27	0	0	0.32	0	0	0	0	0	0.3	0			274	2.90689	267	3.71214			367	3.66742	280	2.94109
28	0	0	0.347691	0	0.1	0	0	0.1	0	0.2			28	0	0	0	0	0	0	0.43	0	0.51	0			275	4.11096	268	1.39284			368	1.08167	281	4.78539
29	0	0	0.1	0	0.1	0	0	0.25	0	0.2			29	0	0	0	0	0	0	0	0	0.283	0			276	6.04401	269	3.81838			369	0.781025	282	2.61725
30	0	0	0	0	0.141421	0	0	0.129321	0	0.509902			30	0	0	0	0	0	0	0	0	0.539	0			277	7.15681	270	1.34164			370	0.860233	283	1.04403
31	0	0	0	0	0.447214	0	0	0.310743	0	0.223607			31	0	0	0	0	0	0	0	0	0.3	0			278	1.74642	271	3.14006			371	0	284	0.824621
32	0	0	0.1	0	0.5	0	0	0.193794	0	0.360555			32	0	0	0	0	0	0	0	0	0	0			279	4.63896	272	2.76586			372	1.58114	285	0.509902
33	0	0.1	0.320156	0	0.3	0.538516	0	0.200002	0	0.360555			33	0	0	0	0.22	0	0.1	0	0.224	0	0			280	5.00899	273	2.23607			373	0	286	8.24197
34	0	0	0	0	0.282843	0.141421	0	0.1	0	0			34	0	0	0	0	0	0	0	0.1	0	0			281	0.728011	274	3.11448			374	0
35	0.223607	0	0	0	0.141421	0	0	0.310743	0	0.447214			35	0	0	0	0	0	0	0.1	0.3	0	0			282	0.360555	275	1.36015			375	0
36	0	0	0	0	0	0	0	0.167	0	0.3			36	0	0	0	0	0	0	0	0	0	0			283	0.1					376	0
37	0	0	0	0	0.1	0.6	0	0.10002	0	0.7			37	0	0	0	0	0	0	0	0	0	0			284	0.632456					377	0
38	0	0	0	0	0.1	0	0	0.166	0	0.509902			38	0	0	0	0	0	0	0	0	0	0			285	1.7					378	0
39	0	0	0	0	0.141421	0	0	0.1	0	0.141421			39	0	0	0	0	0	0	0.21	0	0	0			286	0					379	0
40	0	0	0	0	0.223607	0	0	0.1	0	0.4			40	0	0	0	0	0	0	0	0.316	0	0			287	0.4					370	0
41	0	0	0	0	0.316228	0	0	0.26833	0	0.3			41	0	0	0	0	0	0	0.11	0	0	0			288	0.2					381	0.316228
42	0.316228	0	0	0	0.2	0.905539	0	0.341901	0	0.1			42	0	0	0	0	0	0	0.23	0	0	0			289	0.316228					382	0
43	0.412311	0	0	0	0.2	1.97231	0	4.90952	0	0.4			43	0	0	0	0	0	0	0.1	0	0	0			290	1.61245					383	0
44	0.360555	0	0	0	0.360555	1.23693	0	3.29985	0	0.2			44	0	0.4	0	0	0	0	0	0	0	0			291	0.141421					384	0
45	0	0	0	0	0.282843	0.1	0	0.67082	0	0.5			45	0	0	0	0	0	0.1	0	0	0	0			292	0.640312					385	0
46	0	0	0	0	0.1	0.3	0	0.640312	0	0.141421			46	0	0.1	0	0	0	0.1	0	0	0	0			293	0.3					386	0
47	0	0	0.1	0	0	0	0	0.5	0	0.509902			47	0	0.67	0	0	0	0	0	0.2	0	0			294	0.360555					387	0
48	0	0	0	0.316228	0.2	0	0	0.360555	0	0.2			48	0	0	0	0	0	0	0	0.3	0	0			295	1.28062					388	4.71275
49	0	0	0	0.4	0	0	0	0.1	0	0.316228			49	0	0	0	0	0	0	0	0	0	0			296	0.316228					389	0.905539
50	0.3	0	0	0	0.3	0	0	0.141421	0	0.4			50	0	0	0	0	0	0	0	0	0	0			297	0.223607					390	0.3
51	1.61245	0	0	0	0.2	0.509902	0	0.282843	0	0.316228			51	0	0	0	0	0	0	0	0	0	0			298	1.3					391	0.316228
52	0	0	0	0	0.4	0.2	0	0.360555	0	0.1			52	0	0	0	0	0	0	0	0	0	0			299	0.761577					392	0.360555
53	0.509902	0	1.02591	0	0	0.2	0	0.424264	0	0.316228			53	0	0	0	0	0	0	0	0	0	0			300	0.608276					393	0.412311
54	0	0	0	0	0.2	0.223607	0	0.141421	0	0.1			54	0	0	0	0	0	0	0	0	0	0			301	0.1					394	0.223607
55	0	0	0	0	0.360555	0	0	2.19317	0.4	0.3			55	0	0	0	0	0	0	0	0	0	0			302	0.2					395	0
56	0	0	0.69634	0	0.2	0	0	3.00832	0	0.141421			56	0	0	0	0	0	0	0	0	0	0			303	0.2					396	0
57	0	0	3.75433	0	0.1	0	0	0.1	0	0.2			57	0	0	0	0	0	0	0	0	0	0			304	0.223607					397	1.3
58	0	0	2.42136	0	0.223607	0	0	0.141421	0	1.11803			58	0	0	0	0.5	0	0.14	0	0	0	0			305	0.1					398	0.360555
59	0.2	0	2.07984	0	0.3	0	0	0.360555	0	0.4			59	0	0	0	0	0	0	0	0	0	0			306	0.141421					399	1.0198
60	1	0.860233	2.41661	0	1.55242	0	0	0.316228	0	0.282843			60	0	0	0	0	0	0	0	0	0	0			307	0.141421					400	5.86941
61	0.640312	5.30094	3.53553	0	0.728011	0.824621	0	0.1	0	0.360555			61	0	0	0	0	0	0.1	0	0	0	0			308	0					401	7.31041
62	0.412311	1.62788	3.14006	0	1.02956	0	0.3	0.3	0	0.509902			62	0	0.1	0	0	0	0.14	0	0	0	0			309	0.316228					402	0.722109
63	0	0.360555	1.5	0	2.97321	0	0.424264	0.316228	0	0.5			63	0	0	0	0	0	0	0	0	0	0									403	1.36524
64	0	0.632456	0.860233	0	0.5	0	4.36578	0.538516	0	2.14009			64	0.63	0	0	0	0	0	0	0	0	0									404	1.51284
65	0.316228	2.0025	0.583095	0.223607	0.141421	0	3.40147	0.806226	0	2.06155			65	0.1	0	0	0	0	0	0	0	0	0
66	0	0.5	0.860233	0	0.509902	0	1.40357	3.62491	0	2.5632			66	0.1	0	0	0	0	0	0	0	0	0
67	0	0.7	0.316228	0.282843	0.8544	0.141421	1.52316	1.61245	0	3.25576			67	0.32	0	0	0	0	0	0.21	0	0	0
68	0.67082	0.632456	0.1	0.3	2.52982	0.1	0.316228	1.11803	0	0.761577			68	0	0	0	0	0	0	0	0	0	0
69	1.41421	0	0.316228	0	0.984886	0.316228	0	2.23607	0	0.509902			69	0	0	0	0	0	0	0	0	0	0
70	0.360555	0	0.1	0.583095	0.761577	0	0	1.34164	0	0			70	0	0	0	0	0	0	0	0	0	0
71	0.3	0	0	0	0.282843	0	0.921954	0.608276	0	0			71	0	0	0	0	0	0	0	0	0	0
72	1.7	0	0	0.223607	0.806226	0	0	0.921954	1.7	0			72	0	0	0	0	0	0.1	0	0	0	0
73	0.223607	0	0	0.1	0	0	0	0.141421	0	0.223607			73	0	0.41	0	0	0	0	0	0	0	0
74	0.223607	0	0	0	0	0	0	0	0	0.360555			74	0	0.45	0	0	0	0	0	0	0	0
75	0	0	0.1	0.223607	0.2	0	0	0.1	0	0			75	0	0	0	0	0	0	0	0	0	0
76	0	0	0.316228	0	0.806226	0	0	0	0	0.141421			76	0	0	0	0	0	0	0	0	0	0
77	0	0.213	0	0	1.00499	0	0	0	0	0			77	0	0	0	0	0	0	0	0.1	0	0
78	0.360555	0.1	0	0	0.5	0	0	0	0.3	0			78	0	0	0	0	0	0	0	0	0	0
79	0	0	0	0	0	0	0	0	0.1	0.1			79	0	0	0	0	0	0	0	0	0	0
80	0.412311	0	0	0	0	0	0	0	0	0			80	0	0	0	0	0	0	0	0	0	0
81	0.640312	0	0	0	0	0	0	0	0	0.1			81	0	0	0	0	0	0	0	0	0	0
82	0	0	0	0	0	0	0	0.3	0	0.1			82	0	0	0	0	0	0	0	0	0.224	0
83	0	0	0	0	0	0.223607	0	0	0.640312	0			83	0	0	0	0	0	0	0	0	0.1	0
84	0.608276	0	0	0	0	0	0	0	0.2	0			84	0	0	0	0	0	0	0	0	0	0
85	0.1	0	0	0	0.2	0	0	0.1	0	0			85	0	0	0	0	0	0	0	0	0	0
86	0.948683	0	0.1	0.3	0.1	0.72111	0	0	1	0			86	0.2	0	0	0	0	0	0.14	0	0	0
87	0	0	0.223607	0	2.61725	0.1	0	0.1	0.583095	0			87	0	0.1	0	0	0	0	0	0	0	0
88	0	0	0.1	0	0.282843	0.412311	0	0.2	0	0.1			88	0	0	0	0	0	0	0	0	0	0
89	0	0	0.3	0	0.447214	0	0	0	0	0			89	0	0	0	0	0	0	0	0	0	0
90	0	0	0.538516	0	0.1	0.3	0	0	0.67082	0			90	0	0	0	0	0	0	0	0	0	0
91	0	0	0.1	0	0.141421	0.608276	0	0.2	0.6	0			91	0	0	0	0	0	0	0	0	0	0
92	0	0.223607	0.2	0	0.223607	0.223607	0	0	0	0			92	0	0	0	0	0	0	0.14	0	0	0
93	1.20416	0	0.316228	0	0	0.632456	0	0	0.1	0.3			93	0	0	0	0	1.01	0	0	0	0	0
94	0	0	0.3	0	0.223607	3.9	0	0.806226	0.5	0			94	0	0	0	0	0	0	0	0	0	0
95	0	0	0.141421	0	0.2	0.447214	0	0	1.45602	0.1			95	0	0	0	0	0	0	0	0	0	0.141
96	0	0	0.1	0	0	0	0	0	1.41421	0			96	0	0	0	0	0	0	0	0	0	0
97	0	0	0.5	0	0	0.2	0	0	0.447214	0			97	0	0	0	0	0	0	0	0	0	0
98	0	0	0.3	0	0	0.1	0	0	0.4	0			98	0	0	0	0	0	0	0	0	0	0
99	0	1.65574	0	0	0	0	0	0	0.509902	0			99	0.1	0	0	0	0	0	0	0	0	0.1
100	0	0.20001	0.2	0	0	0	1	0	0.424264	0			100	0	0	0	0	0	0.4	0	0.4	0	0
101	0.141421	0.376808	0	0	0	0	0.640312	0.1	0.3	0			101	0	0	0	0	0	0	0	0	0	0
102	0	1.253	0	0.632456	0	0.4	0.316228	0	0.360555	0			102	0	0	0	0	0	0	0.2	0	0	0
103	0	0	0.223607	0.1	0	0	0	0.3	0.316228	0.72111			103	0.4	0	0	0	0	0	0	0	0	0
104	0	0	0.316228	0.1	0	0.282843	0	0.4	0	0			104	0	0	0	0	0	0	0.1	0	0	0
105	0	0	0	0	0	0.1	0	0.905539	0	0.3			105	0.1	0	0	0	0	0	0	0	0	0
106	0	0	0.2	1	0	0.316228	0	0.806226	0	0			106	0.4	0	0	0	0	0	0	0	0	0
107	0.223607	0	0.141421	0.2	0	0	0	0.538516	0	0			107	0.1	0	0	0	0	0	0	0	0	0
108	0	0	0.282843	0.2	0	0.3	0	0.5	0	0			108	0.45	0	0	0	0	0	0	0	0	0
109	0	0.538516	0.141421	0	0	0.223607	0	0	0	0			109	0	0	0	0	0	0	0	0	0.2	0
110	0	0	0.141421	0	0.2	0	0	0	0	0			110	0	0	0	0	0	0	0	0	0	0
111	0	0	0.360555	0	0	0	0	0	0	0			111	0	0	0	0	0	0	0	0	0	0
112	0	0.316228	0.1	0	0	0	0	0.141421	0.141421	0			112	0	0	0	0	0	0.36	0.29	0	0	0
113	0	0.509902	0.1	0	0	0	0	0	0.3	0.2			113	0	0	0	0	0	0	0	0	0	0
114	0	0.550019	0.1	0.5	0.1	0	0	0	0	0.282843			114	0	0	0	0.4	0	0	0	0	0	0
115	0	2.03022	0.1	0.3	0.2	0	0	0.3	0	1.48661			115	0	0	0.36	0	0	0	0	0	0	0
116	0	3.50659	0.223607	0.223607	7.01783	0	0	0.3	0	0.412311			116	0	0	0	0	0.23	0	0	0	0	0
117	0	2.60672	0.282843	0	0.761577	0	0	0	0	0.360555			117	0	0	0	0	0.14	0	0	0	0	0
118	0	2.67572	0.412311	0.223607	0	0	0.5	0	0	0			118	0	0	0	0	0	0	0	0	0	0
119	0	1.38405	0.5	0	0.447214	0	0.583095	0.2	0.806226	0			119	0	0	0	0	0.42	0	0	0	0	0
120	0	1.4265	0.360555	0	0.316228	0	0.316228	0.141421	0.1	0			120	0	0	0	0	0	0	0	0	0	0
121	0	0.40002	0.781025	0.412311	0.141421	0	0.1	0	0	0.3			121	0	0	0	0.1	0	0	0	0	0	0
122	0	0.835201	0.360555	0	0	0	0	0	0.3	0.1			122	0	0	0	0.1	0	0	0	0	0	0
123	0	0.409141	0.412311	0	0.412311	0.5	0	0	0	0.1			123	0	0	0	0	0	0	0	0	0	0
124	0	0	0.806226	0	0.3	0.583095	0	0	0	0			124	0.54	0	0	0.14	0	0	0	0	0	0
125	0	0	0.316228	0.1	1.55242	0.2	0	0	0.2	0			125	0.1	0	0	0	0	0	0	0	0	0
126	0	0.200002	0.282843	0.4	0	0	0.223607	0	0	0			126	0	0	0	0	0	0	0.51	0	0	0
127	0	0	0.360555	0.141421	0	0	0.943398	0	0	0			127	0	0	0	0.2	0	0	0	0	0	0
128	0	0.651549	0	0.1	0	0	0	0	0	0.141421			128	0	0	0	0	0	0	0	0	0	0
129	0	0	0.583095	0	0	0	0	0	0.989949	0			129	0	0	0	0	0	0	0	0	0	0
130	0.5	0	0.1	0.1	0	0	0.707107	0	0	0			130	0	0	0	0	0	0	0	0	0	0
131	0	0	0.316228	0	0	0	0	0.2	0.141421	0			131	0	0	0.5	0	0	0	0	0	0	0
132	0	0	0.4	0.3	0	0	0	0	0	0			132	0	0	0	0	0	0	0	0	0	0
133	0.2	0	0.282843	0	0	0	0	0	0.223607	0			133	0	0	0	0	0	0	0	0	0	0
134	0.2	0	0.2	0	2.14009	0	0	0.3	0.1	0.316228			134	0	0	0	0	0	0	0	0	0	0
135	0.640312	0	0.282843	0	1.20416	0	0	0	0.2	0			135	0	0.1	0	0	0	0	0	0	0	0
136	0	0	0.8544	0	0.2	0.282843	0	0.1	0.6	0			136	0	0	0	0	0	0	0	0	0	0
137	0	0	0.538516	0	0	0	0	0	0.141421	0			137	0	0	0	0	0	0.1	0	0	0	0
138	0	0	2.2561	0	0	0	0	0	3.19531	0.1			138	0	0.1	0	0	0	0	0	0	0	0
139	0	4.25859	0.806226	0	0	0	1.27279	0	3.76563	0.2			139	0	0	0	0	0	0	0	0	0	0
140	0	3.92436	0.412311	0	0.1	0	0.223607	0.2	3.53553	0			140	0	0	0	0	0	0	0	0	0	0
141	0	2.38795	0.72111	0	0.3	0	0	0.2	0.781025	0			141	0	0	0	0	0	0	0.37	0	0	0
142	0.447214	1.85657	0.565685	1.6763	0	0.316228	1.43178	0	0.282843	0			142	0	0	0	0.22	0	0	0	0	0	0
143	0.632456	3.99413	0.894427	0.5	0	0.1	0.860233	0	0.1	0			143	0.1	0	0	0	0	0	0	0	0	0
144	0.1	0.903203	0.141421	0	0	0.360555	0.8	0	0.67082	0.806226			144	0.1	0	0	0	0	0	0	0.3	0	0
145	1.34536	0.3	0.1	0.1	0	1.52971	1.55242	0	1.36015	0.316228			145	0.32	0	0	0	0	0.81	0	0	0	0
146	0.538516	0.360555	0.360555	0.412311	0	0.360555	0	0	4.60652	0.223607			146	0	0	0	0	0	0	0	0	0	0
147	0	0	0.5	0.223607	0.583095	0.424264	0	0.2	4.25206	0			147	0	0	0	0	0	0	0	0	0	0
148	0.632456	0.424264	1.51327	0.360555	0	0.1	0.1	0	3.44819	0			148	0	0	0	0	0	0	0	0	0	0
149	0	0.3	1.94165	0.2	0	0	0	0	1.00499	0.1			149	0	0	0	0	0	0	0	0.412	0	0
150	0.223607	0.4	2.06155	0.424264	0.1	0.1	0	0	0.67082	0.1			150	0	0	0	0	0	0	0	0	0	0
151	0	0	1.21655	1.56205	0.4	0.141421	0	0	0.761577	0.1			151	0	0	0	0	0	0	0	0	0	0
152	0	0	0.4	2.59615	0.608276	0	0	0	1.64924	0.3			152	0	0	0	0	0	0	0.65	0	0	0
153	0	0	0.141421	2.20907	0.282843	0	0.447214	0.2	1.76918	0.1			153	0	0	0	0	0	0	0	0	0	0
154	0	0	0.316228	2.0025	1.80278	0.67082	0.223607	0.1	1.1	0			154	0	0	0	0	0	0	0	0	0	0
155	0	0	2.55539	0.72111	0.583095	0.5	0	0	0.5	0.1			155	0	0	0	0	0	0	0	0	0	0
156	0	0	4.20476	0.2	0	0.316228	0.412311	0	0	0.608276			156	0	0	0	0	0	0	0	0	0	0
157	0	0	1.61245	0.538516	0	0.1	0	0	1.2	0.424264			157	0	0	0	0	0	0	0	0	0	0
158	0	0	0.707107	1.83576	0	0	0	0	0.761577	0.1			158	0	0	0	0.41	0	0	0	0	0	0.316
159	0	0.223607	0.223607	0.848528	0.1	0.282843	0	0	1.41421	0			159	0	0	0	0	0	0	0	0	0	0.224
160	0	0	0.632456	0.8	0	0	0	0.1	2.91204	0.141421			160	0	0	0	0	0	0	0.64	0	0	0
161	0.360555	0	2.10238	0.538516	0	0.1	0	1.52316	0.1	0.316228			161	0	0	0	0	0	0.4	0	0	0	0
162	0	0	2.1587	1.08167	0.360555	0	0	0.316228	0	0.1			162	0	0.51	0	0	0	0	0	0	0	0
163	0	0.3	2.23607	1.14017	0.538516	0	0	0.3	0.632456	0.316228			163	0	0.1	0	0	0	0	0	0	0	0
164	0	0.921954	1.33417	0.316228	0.424264	0	0	0	0.4	0.8544			164	0	0	0	0	0	0	0	0	0	0
165	0	0.447214	1.93132	0.1	0.9	2.20227	0.1	0	0.538516	0			165	0	0.1	0	0	0	0	0	0	0	0
166	0	0.412311	2.10238	0.316228	0.5	0.3	0	0	1.13137	0			166	0	0	0.1	0	0	0	0	0	0	0
167	0	0.360555	0.141421	0	0.728011	2.1095	0	0.1	0.360555	0			167	0	0	0	0	0	0	0	0	0	0
168	0	0.538516	0.141421	2.18403	0	1.74929	0	0.447214	0.282843	0			168	0	0	0	0	0	0	0	0	0	0
169	0	0.894427	0.894427	4.07983	0	0.3	0	0	0.2	0			169	0	0	0	0	0	0	0	0	0	0
170	0	0	0.141421	0.9	0	1.23693	0	0.1	0	0.5			170	0	0	0	0.22	0	0	0.42	0	0	0
171	0	0	0.1	1.33108	0	0.282843	0	0.1	0.5	0.360555			171	0	0	0	0	0	0	0	0	0	0
172	0	0	0	0.317043	0.3	0.141421	0	0	0	1.253			172	0	0	0	0	0	0	0	0	0	0
173	0	0	0.141421	0.816838	0.538516	0.223607	0	0	0.4	0			173	0	0	0	0	0	0	0	0	0	0
174	0	0	0.632456	0.865009	0.6	1.02956	0	0	0.282843	0.316228			174	0	0	0	0	0	0	0	0	0	0
175	0	1.39284	0.412311	0.445243	0	0.8544	0	0	0	0.360555			175	0	0	0	0	0	0	0	0	0	0
176	0	0.2	0.1	0.865009	0	1.16619	0	0	0	0			176	0	0	0	0	0	0	0	0	0	0
177	0	0.1	0	1.36372	0	0.761577	0	0	0	0			177	0.1	0	0	0	0	0	0	0	0	0
178	0	1.71172	0.608276	3.20425	0	0	0	0	0	0.223607			178	0	0	0	0	0	0	0	0	0	0
179	0	0.2	0.1	1.2705	0	0.2	0	0.223607	0	0.1			179	0	0	0	0	0	0	0	0	0	0
180	0	0.608276	0	2.17169	0.1	0	0	0.316228	0	0.806226			180	0	0	0	0	0	0	0	0	0	0
181	0	0.141421	0	0.3	0.8	0	0	0	0	0.447214			181	0	0.1	0	0	0	0	0	0	0	0
182	0	0	0	0	0.316228	0.4	0	0	0	0.360555			182	0	0	0	0.22	0	0	0	0	0	0
183	0	0	0	0.688967	0	0.1	0	0	0	0			183	0	0	0	0	0	0	0	0	0	0
184	0	0.424264	0	0	0.360555	0.1	0	0	0	0.316228			184	0	0	0	0	0	0	0	0	0	0
185	0	0	0	0	0.583095	0	0	0.3	0	0			185	0	0	0	0	0	0.2	0	0	0	0
186	0	0	0	0.3	0	0	0	0.141421	0	0			186	0	0	0	0	0.33	0	0	0	0	0
187	0	0	0	0.1	0	0	0	0.1	0	0			187	0	0	0	0	0	0	0	0	0	0
188	0	0	0	0.1	0.316228	0	0	0.1	0	0.1			188	0	0.1	0	0	0.42	0.36	0	0	0	0
189	0	0	0.2	1.33135	0.761577	0	0.509902	0.360555	2.0025	0.2			189	0	0	0	0	0	0	0	0	0	0
190	0	0	0	2.10124	0.781025	0	0	0	0.424264	0			190	0	0	0	0.1	0	0.36	0	0	0	0.224
191	0	0	0.223607	2.33748	0.141421	0	0.4	0	0.538516	0.1			191	0	0	0	0	0	0	0	0	0	0
192	0	0	0.6	4.19377	0	0	0.5	0.2	0	0			192	0	0	0	0	0	0	0	0	0	0.224
193	0	0	1.74642	1.336	0	0	0.141421	0	2.1587	0.2			193	0	0	0	0	0	0	0	0	0	0
194	0	0	0.282843	1.21003	0.316228	0	0	0	3.32415	0.1			194	0	0.1	0	0	0	0	0	0	0	0
195	0	0	0.360555	2.0151	0	0	0.223607	0.1	8.90674	0.1			195	0	0	0	0	0	0	0	0	0.361	0
196	0	0	0.282843	1.975	0.141421	0	0	0	9.54254	0.2			196	0	0	0	0	0	0	0	0	0	0
197	0	0	0	0.247	0	0	0	0	6.21691	0			197	0	0	0	0	0	0	0	0	0	0
198	0	0	0	0.329	0	0	0	0	5.74891	0			198	0	0.14	0	0	0	0	0	0	0.721	0
199	0	0.1	0	0.247	0	0	0	0	1.8868	1.00499			199	0	0	0	0	0	0	0	0	0	0
200	0	0	0	0.493	0.2	0	0	0	4.272	0.1			200	0	0	0	0	0	0	0	0	0	0
201	0	0.2	0.1	0.1	0	0	0	0	2.28254	0			201	0	0	0	0	0	0	0	0	0	0
202	0	0.1	0	0.903728	0	0	0	0	1	0.1			202	0	0	0	0	0	0	0	0	0	0
203	0	0.282843	1.90263	0.7	0	0	0	0	0.1	0.781025			203	0	0	0	0	0	0	0	0	0	0
204	0	0	4.90408	0.665555	0	0	0	0	0.806226	0.6			204	0	0	0	0	0	0	0	0	0	0
205	0.5	0	0.223607	0.767516	0	0	0	0	0.412311	0			205	0	0	0	0	0.73	0.14	0	0	0	0
206	0	0	0.360555	0.723162	0	0	0	0	0.3	0			206	0	0	0	0	0	0	0	0	0	0
207	0	0.360555	0.921954	0.445243	0.360555	0	0	0	0.8	0.1			207	0	0.1	0	0	0	0	0	0	0	0
208	0	0	0.282843	0.577958	0.447214	0	0	0	0.1	0.412311			208	0	0	0	0	0	0	0	0	0	0
209	0	0	0	0.649443	0	0	0	0	0.282843	0			209	0	0	0	0	0	0	0	0	0	0
210	0	0	5.62228	0.584616	0	0	0	0	0.6	0.141421			210	0	0	0	0	0	0	0.53	0	0	0
211	0.921954	0	1.8868	0.532023	0	0	0	0	5.20385	0.1			211	0	0	0	0	0	0	0.31	0	0	0
212	3.96232	0	0.761577	0.599083	0	0	0	0.1	0.6	0.632456			212	0	0.1	0	0	0	0	0	0	0	0
213	2.20227	0	1.64012	0.6	0	0	0	0.223607	0.921954	0.360555			213	0	0	0	0	0	0	0	0	0	0.316
214	1.74642	0	2.46982	0.890485	0.223607	0	0	0	0.2	0.806226			214	0	0	0	0	0	0	0	0	0	0
215	1.23693	0	2.3	0.8	0.5	0.1	0	0.141421	0.223607	0.447214			215	0	0	0	0	0	0	0	0	0	0
216	0.223607	0	6.8942	1.71094	0.223607	0.316228	0	0	0.509902	0.860233			216	0	0	0	0	0	0	0	0	0	0
217	0.1	0	4.39659	0.704904	0.1	0.316228	0.1	0	0.1	0.860233			217	0	0	0	0	0	0	0	0	0	0
218	0.2	0	1.52316	0.804294	0.1	0	0	0	0	0.1			218	0	0	0	0	0	0	0.29	0	0	0.283
219	0	0	2.05913	0.718955	0	0	0.761577	0	0	0.3			219	0	0	0	0	0	0	0.14	0	0	0.224
220	0	0	1.16619	0.518174	0	0	0	0	0	0.2			220	0	0.85	0	0	0	0	0.23	0	0	0
221	0.282843	0	0.316228	0.408359	0	0	0	0	0	0.5			221	0	0	0	0	0	0	0.21	0	0	0
222	0	0	0	1.08132	0.728011	0	0	0	0	0.1			222	0	0	0	0	0	0	0.21	0	0	0
223	0	0	0	0.6	0.632456	0	0.141421	0	0	0.141421			223	0	0	0	0	0	0	0	0	0	0
224	0	0	0	0.719092	0	0	0	0	0	0.141421			224	0	0.1	0	0	0	0	0	0	0	0
225	0	0	0	1.509	0.1	0.1	0	0	0.1	0			225	0.32	0.67	0	0	0	0	0	0	0	0
226	0.67082	0	0	0.622142	0	0.4	0.412311	0	0.2	0			226	0	0	0	0	0	0	0	0	0	0
227	0	0	0	0.742267	0.894427	0	0.943398	0	0	0			227	0	0	0	0	0	0	0	0	0	0.2
228	0	0	0	1	0	0	0.3	0	0	0			228	0	0	0	0	0	0	0.33	0	0	0.2
229	0	0	0.412311	0.70481	0.223607	0	0.5	0	0	1.21655			229	0	0	0	0	0	0	0	0	0	0
230	0	0	0	0.518174	0.141421	0.538516	0	0.1	0	0.2			230	0	0	0	0	0	0	0	0	0	0
231	0	0	0	0.8	0	0.3	0	0	0	0.3			231	0	0	0	0	0	0	0	0	0	0
232	0.860233	0.1	0	2.10639	0	0.1	0	0	0	0.223607			232	0	0	0	0	0	0	0.53	0	0	0
233	0.2	0.2	0	0.53295	0	0	0	0	0	0.1			233	0.28	0	0	0.1	0	0	0.31	0	0	0
234	0.1	0	0	0.747717	0	0	0	0	0.728011	0.3			234	0.22	0.1	0	0.5	0	0	0	0	0	0
235	0.5	0.223607	0	0.411	0	0	0.1	0	0.2	0.316228			235	0	0	0	0.1	0	0	0	0	0	0
236	0	0.223607	0	0.411	0	0	0	0	0.316228	0.141421			236	0	0.1	0	0	0	0	0.37	0	0	0
237	0	0	0	0	0.447214	0	0	0.1	0	0.538516			237	0	0	0	0	0	0	0	0	0	0
238	0	0	0	0	0	0.2	0	0	0	0.141421			238	0	0	0	0	0	0	0	0	0	0
239	0.1	0	0	0	0	0	0	0	0	0			239	0	0	0	0	0	0	0	0	0	0
240	0.1	0	0.2	0	0	0	0	0	0	0			240	0	0	0	0	0	0	0	0	0	0
