# Supplementary material for: Long-term study of behaviors of two cohabiting sea urchin species, Mesocentrotus nudus and Strongylocentrotus intermedius, under conditions of high food quantity and predation risk in situ
Source: PeerJ. 2019 Nov 22;7:e8087. doi: 10.7717/peerj.8087 (PMC6876488; doi:10.7717/peerj.8087)
Supplement: Supplemental Information 3 — (A) The distances (cm) traveled by sea urchins S. intermedius during 240 min under conditions of calm weather. (B) The distances (cm) traveled by sea urchins S. intermedius during 240 min under conditions of stormy weather. (C) The distances (cm) traveled by sea urchins S. intermedius during escape under conditions of stormy weather. [file peerj-07-8087-s003.xlsx]

## Sheet: Лист1
	(A)														(B)												(C)
Time, min	S. int. 1	S. int. 2	S. int. 3	S. int. 4	S. int. 5	S. int. 6	S. int. 7	S. int. 8	S. int. 9	S. int. 10				Time, min	S. int. 1	S. int. 2	S. int. 3	S. int. 4	S. int. 5	S. int. 6	S. int. 7	S. int. 8	S. int. 9	S. int. 10			Time, min	S. int. 2	Time, min	S. int. 3	Time, min	S. int. 4	Time, min	S. int. 9	Time, min	S. int. 10
1	0.223607	0.447214	0.1	0.223607	0.1	0.1	0	0.9	0.447214	0.412311				1	0	0	0	0.81	0.985	0.224	0	0.316	0.1	0.1			246	0.267402	245	0.824621	374	1.22066	313	0.854	238	2.025
2	0.7	0.360555	0.1	0.223607	0	0.1	0	0.860233	0.1	0.316228				2	0	0	0	0.32	0.224	0.224	0.728	0.141	0.1	0.1			247	0.129958	246	0.2	375	0.5	314	0.1	239	2.202
3	0.6	0.1	0.2	0.509902	0.141421	0.1	0	0.2	0	0.316228				3	0	0	0	0.2	0.2	0	0.2	0	0.1	0			248	0	247	0.3	376	0.223607	315	0	240	2.309
4	1.26491	0.3	0.1	0.424264	0.2	0.223607	0	0	0.1	0.1				4	0	0	0	0	0.1	0.1	0.224	0	0.1	0			249	0	248	1.00499	377	0.806226	316	0.5	241	0.985
5	0.824621	0.4	0.360555	0.223607	0.2	0	0.1	0	0.141421	0				5	0	0	0	0.2	0.922	0.1	0.2	0	0.1	0			250	0	249	0	378	0.538516	317	0.316	242	1.432
6	0.1	0.632456	0.2	0.141421	0.282843	0	0.2	0.632456	0.509902	0.1				6	0	0	0	0.2	0.141	0	0.2	0	0.1	0			251	0	250	1.97231	379	0.4	318	0.316	243	0.943
7	0	0.583095	0.141421	0.412311	0	0	0.7	0	0.2	0				7	0	0	0	0.2	0	0	0.1	0	0	0			252	0	251	0.223607	370	0.412311	319	0.5	244	0.728
8	0.2	0.447214	0	0.3	0	0	0.412311	0	0.1	0.1				8	0	0	0.14	0	0.5	0	0.224	0	0	0			253	0	252	1.48661	381	0.316228	320	0	245	0.825
9	0.2	0.412311	0.223607	0.223607	0	0	0	0	0.1	0.1				9	0	0	0	0	0.2	0	0.1	0	0.1	0			254	0	253	0.806226	382	0.8544	321	0	246	0.1
10	0.316228	0.4	0	0.360555	0.1	0.1	0.360555	0	0	0.1				10	0	0	0	0	0	0.412	0.1	0	0	0			255	0.828807	254	0.424264	383	0.9	322	0.141	247	0.224
11	0.1	0.565685	0.141421	0.141421	0.141421	0.141421	0.141421	0	0.1	0.1				11	0	0	0	0	0.2	0.1	0	0	0.1	0			256	0	255	0.632456	384	1.3	323	0.141	248	0
12	0.4	0.360555	0	0.447214	0.2	0	0.141421	0	0.316228	0.3				12	0.48	0.1	0.14	0	0.2	0.1	0.1	0	0	0			257	0	256	0	385	1.52643	324	0.1	249	0
13	0.424264	0.1	0.141421	0.360555	0.1	0.1	0	0	0	0.1				13	0	0	0	0	0.1	0	0.224	0	0	0			258	0	257	0	386	1.04403	325	0.7	250	0.424
14	0.72111	0.2	0.1	0.1	0.3	0	0.2	0.316228	0	0				14	0	0	0	0	0	0.283	0.1	0	0	0			259	0.083	258	0	387	0.707107	326	0.316	251	0.922
15	0	0.1	0.2	0.538516	0	0	0	0	0	0.282843				15	0	0	0	0	0	0	0.2	0	0	0			260	0	259	0	388	1.34536	327	0.283	252	7.024
16	0.282843	0.141421	0.223607	0	0.316228	0.1	0	0.316228	0	0.1				16	0.38	0	0	0	0.1	0.1	0	0	0	0			261	0	260	0	389	0.640312	328	0	253	1.393
17	0.141421	0.1	0.223607	0.1	0.2	0.1	0.2	0.2	0.412311	0.3				17	0	0	0	0	0.1	0.1	0	0	0	0			262	0	261	0.5	390	4.85077	329	1.5	254	1.217
18	0.447214	0.412311	0	0.316228	0	0.141421	0.2	0.5	0.632456	0.2				18	0	0	0	0	0.2	0.141	0	0	0	0			263	1.05304	262	0.4	391	3.52278	330	0.224	255	0.3
19	0.141421	0.141421	0	0.316228	0.2	0	0.3	0.447214	0	0.223607				19	0	0	0	0	0.224	0.1	0	0	0	0			264	0	263	2.24722	392	3.05287	331	0.424	256	3.324
20	0.4	0.141421	0.538516	0.223607	0.2	0	0.5	0	0	0.223607				20	0	0	0	0	0.424	0.1	0	0	0	0			265	0.2	264	2.46982	393	2.02485	332	0.64	257	1.703
21	0.1	0.2	0.141421	0.223607	0	0	0.141421	0	0	0.360555				21	0	0	0	0	0.1	0.1	0	0	0	0			266	4.10749	265	0.412311	394	1.9799	333	0.283	258	1.118
22	0.316228	0.1	0.223607	0.141421	0.1	0	0	0.1	0	0.1				22	0.55	0	0	0	0.2	0.141	0	0	0	0			267	3.46558			395	2.11713	334	0.141	259	1.217
23	0.1	0.316228	0.1	0.2	0.1	0	0	0.360555	0	0.2				23	0	0	0	0	0.3	0	0.1	0	0	0			268	0.837558			396	2.4157	335	0.2	260	4.13
24	0.4	0	0.141421	0.1	0	0	0.2	0.2	0.1	0.3				24	1.27	0	0	0	0.141	0.141	0	0	0	0			269	1.17498			397	1.15036	336	0.283	261	1.487
25	0.141421	0.1	0.141421	0.360555	0	0	0.3	0	0	0.141421				25	0	0	0	0	0.412	0	0	0	0	0			270	1.02714			398	1.51435	337	1.456	262	3.061
26	0.1	0.1	0	0.223607	0	0.1	0.632456	0	0	0.141421				26	0.35	0	0	0	0.412	0	0	0	0	0			271	1.45737			399	0.450848	338	1.166
27	0.3	0.4	0	0.316228	0	0	0.223607	0	0	0				27	0.2	0	0	0	0.412	0	0	0	0	0.2			272	0.637194			400	0.676734	339	0.6
28	0.1	0.141421	0	0.141421	0	0.1	0.509902	0.141421	0.1	0.1				28	0	0	0	0	0.1	0	0	0.3	0	0			273	0.129321			401	0.707684	340	0.608
29	0.1	0.538516	0	0.223607	0	0	0.583095	0.632456	0.1	0.223607				29	0	0	0	0	0.361	0	0	0	0	0			274	1.00344			402	0.53051	341	1.91
30	0.2	0.1	0.223607	0.1	0	0	0	0	0	0.1				30	0.21	0	0	0	0.1	0.1	0	0.2	0	0			275	0			403	0.959085	342	1.02
31	0.1	0.1	0.2	0.141421	0	0	0	0	0.141421	0.223607				31	0	0	0	0	0.361	0.1	0	0	0	0			276	0.413			404	0.857646	343	0.316
32	0.2	0	0	0.1	0	0	0.424264	0.424264	0.608276	0.141421				32	0	0	0	0	0.1	0	0	0	0	0			277	0.165			405	0.800391	344	0.2
33	0	0.1	0.360555	0.141421	0	0	0.447214	0	0.223607	0.223607				33	0	0	0	0	0.361	0.224	0	0	0	0			278	0.083			406	0.6012	345	2.04
34	0.3	0.2	0	0.223607	0	0	0.141421	0	0.1	0.5				34	0	0	0	0	0.316	0	0	0	0	0.361			279	0			407	1.84023	346	1.921
35	0.223607	0	0.141421	0.2	0	0	0.2	0.761577	0	0.2				35	0	0	0	0	0.707	0	0	0	0	0.224			280	0.446723			408	1.35347	347	1.72
36	0.2	0.223607	0.141421	0.1	0	0	0	0	0.223607	0.3				36	0	0	0	0.1	0.4	0.1	0	0	0	0			281	0			409	3.27723	348	1.803
37	0	0.282843	0	0.223607	0	0	0.424264	0.761577	0	0.360555				37	0	0	0	0.1	0.1	0	0	0	0	0			282	0			410	2.12132	349	1.581
38	0.1	0.1	0.223607	0.2	0	0.1	0.2	0	0	0.1				38	0	0	0	0	0.583	0	0	0	0	0			283	0			411	3.18904	350	1.91
39	0.316228	0.3	0	0.316228	0	0	0	0	0	0.316228				39	0	0	0	0	0.2	0	0	0.1	0.1	0			284	0			412	0.8	351	2.865
40	0.608276	0.1	0	0.2	0	0	0.424264	0.2	0	0.141421				40	0	0	0.2	0	0.3	0	0	0	0	0			285	0.3			413	0.608276	352	2.121
41	0.447214	0.4	0	0.316228	0	0	0.3	1.11803	0	0.223607				41	0	0	0	0	0.2	0	0	0	0.1	0			286	0.216157			414	0.360555	353	1
42	0.4	0.141421	0	0.447214	0	0	0.360555	0	0	0.360555				42	0	0	0	0	1.082	0	0	0	0	0							415	0.223607	354	1.334
43	0	0.1	0	0.2	0.1	0	0.141421	0	0	0.223607				43	0	0	0	0	0.64	0	0	0	0	0							416	0.282843	355	1.3
44	0	0.1	0.2	0.1	0	0.141421	0.360555	0.3	0	0.2				44	0	0	0	0	0	0	0.1	0	0	0							417	0.509902
45	0.3	0.141421	0.1	0.141421	0	0.1	0.447214	0.1	0	0.316228				45	0	0	0	0	0.1	0	0	0.224	0.1	0							418	0.141421
46	0.424264	0.583095	0.141421	0.223607	0	0	0.509902	0	0	0.316228				46	0	0	0	0	0	0	0.1	0	0	0							419	0.3
47	0.1	0	0	0.509902	0	0	0.223607	0.5	0	0.1				47	0	0	0	0	0.224	0.1	0	0	0	0							420	2.14709
48	0.2	0.6	0	0.1	0	0	0.3	0.447214	0	0.2				48	0	0	0	0	0.141	0	0	0	0	0							421	1.43178
49	0.1	0.1	0	0.1	0	0.223607	0.2	0.707107	0	0.141421				49	0	0	0	0	0.1	0	0.1	0	0.1	0							422	0.316228
50	0.3	0.282843	0.223607	0.360555	0.2	0.1	0.282843	0	0	0.1				50	0	0	0	0	0.1	0.141	0	0.283	0	0							423	0.989949
51	0.2	0.1	0	0.223607	0.316228	0	0.424264	0	0	0.360555				51	0.46	0	0	0	0	0.141	0	0	0	0							424	1.13137
52	0.141421	0.412311	0	0.282843	0.316228	0	0.141421	0	0	0.316228				52	0	0	0	0	0.361	0.224	0.707	0	0	0							425	1.26491
53	0.1	0.2	0.1	0.141421	0	0	0.67082	0	0	0.2				53	0	0	0	0	0.1	0	0.141	0	0	0							426	2.11896
54	0.223607	0.282843	0.1	0.447214	0	0.1	0.316228	0.707107	0.1	0.316228				54	0	0	0	0	0.1	0	0	0	0.141	0							427	0.223607
55	0	0.2	0.141421	0.447214	0	0	0.282843	0.360555	0	0.316228				55	0	0	0	0	0.447	0	0.1	0	0.566	0							428	0.2
56	0.1	0.1	0	0.1	0.141421	0.824621	0.330218	0.205915	0	0.538516				56	0	0	0	0	0.4	0	0	0	0.141	0							429	0.5
57	0.1	0.316228	0.1	0	0.2	0.360555	0.330218	0.11136	0	0.447214				57	0	0	0	0	0.4	0	0	0	0.224	0							430	0
58	0.223607	0	0	0	0.282843	0.2	0.293557	0.147	0.2	0.223607				58	0	0.1	0	0	0	0.1	0	0	0	0							431	0
59	0	0.141421	0	0	0.141421	0.608276	0.121495	0.219146	0.223607	0.1				59	0	0	0	0	0.224	0.1	0	0	0	0							432	0
60	0.3	0	0	0	0.141421	0.424264	0.504739	0.097	0	0.223607				60	0	0	0	0	0.224	0.1	0	0	0.141	0							433	1.70294
61	0.141421	0	0	0	0.141421	0.316228	0.2	0.245	0.141421	0.282843				61	0	0	0	0	0.3	0	0	0	0.1	0							434	0
62	0.1	0.1	0	0	0	0.7	0.340846	0.176963	0.316228	0.223607				62	0	0	0	0	0.424	0	0	0	0	0							435	0
63	0.1	0.1	0	0.360555	0.141421	0.3	0.692116	0	0.447214	0.1				63	0	0.1	0	0	0.7	0.1	0	0	0.1	0							436	0
64	0.2	0.1	0.360555	0.223607	0.1	0.1	0	0.2	0.2	0.141421				64	0	0	0.28	0	1	0	0	0	0	0							437	0
65	0.223607	0.2	0.223607	0.141421	0.2	0.141421	0.121495	0.244	0.141421	0.141421				65	0	0	0	0	0.5	0	0	0	0	0							438	0
66	0.2	0.223607	0.141421	0.1	0.1	0.1	0.121495	0.205679	0	0.2				66	0	0	0	0	0.141	0	0	0.1	0	0							439	0
67	0.1	0.1	0.1	0.141421	0.2	0.360555	0.2	0.2	0	0.360555				67	0	0	0.1	0	0.2	0.1	0	0	0	0							430	0
68	0.282843	0.141421	0.141421	0	0.1	0.2	0.307833	0.1	0.141421	0.447214				68	0	0	0.2	0	0.2	0	0	0	0	0							441	0
69	0.1	0.3	0	0.360555	0.7	0.223607	0.170423	0	0.1	0.282843				69	0	0	0.22	0	0	0	0	0	0.141	0							442	0
70	0	0	0.360555	0.5	0.4	0.4	0.1	0.139316	0.223607	0.282843				70	0	0	0	0	0.141	0	0	0.1	0	0							443	0
71	0.141421	0.141421	0.5	0	0.223607	0.223607	0	0	0.282843	0.538516				71	0	0	0.1	0.2	0.224	0	0	0	0.1	0							444	0
72	0	0.141421	0	0.316228	0.4	0.3	0.126823	0.140014	0.141421	0.282843				72	0.75	0	0	0	0.316	0	0.1	0	0.1	0							445	0
73	0	0	0.316228	0.1	0.223607	0	0.1	0.098	0	0.2				73	0	0	0	0	0.283	0	0	0	0.1	0							446	0
74	0	0	0.1	0	0.1	0.282843	0.218257	0.1	0.223607	0.282843				74	0	0	0	0	0.361	0	0	0	0.141	0							447	0
75	0.282843	0.2	0	0	0.223607	0.316228	0.3	0.1	0.223607	0.141421				75	0	0	0	0	0.412	0	0	0	0	0							448	0
76	0	0	0	0	0.1	0.316228	0.12621	0.097	0.223607	0.1				76	0	0	0	0	0.361	0	0	0	0.1	0							449	0
77	0	0	0	0.1	0.1	0.141421	0.184459	0.110923	0	0				77	0	0	0	0	0.2	0	0.361	0	0.1	0							450	0
78	0.1	0	0.1	0.316228	0	0.2	0	0.2	0.2	0.1				78	0	0	0.28	0.1	0.224	0	0	0	0.1	0.316							451	0
79	0.9	0.1	0.316228	0.223607	0.1	0.1	0.153912	0.205915	0.1	0.447214				79	0	0	0	0	0.2	0.1	0.2	0	0.1	0							452	0
80	0.905539	0	0.223607	0.141421	0.1	0	0.126823	0.205915	0.1	0.316228				80	0	0	0	0	0.566	0	0	0	0	0							453	0
81	0	0	0.141421	0	0.1	0.1	0	0.110923	0.1	0.316228				81	0.72	0	0	0	0.5	0	0	0	0.1	0							454	0
82	0	0.1	0	0	0.2	0.1	0.203578	0	0.141421	0				82	0	0	0	0	0.424	0.1	0.3	0	0.224	0							455	0
83	0	0.1	0	0.223607	0	0.141421	0.337676	0	0.1	0.360555				83	0	0	0	0	0.224	0	0.141	0.1	0.224	0							456	0
84	0	0.141421	0.223607	0	0.1	0.1	0.1	0.139316	0.141421	0.2				84	0	0	0	0.1	0.4	0.141	0	0.141	0	0							457	0
85	0	0	0	0.360555	0.141421	0.2	0	0.205915	0	0.412311				85	0	0	0	0	0	0	0	0.1	0.141	0							458	0
86	0	0.1	0.360555	0.4	0	0.2	0.214672	0	0.1	0.360555				86	0	0	0	0	0	0	0.224	0	0.1	0							459	0
87	0	0.1	0.4	0.447214	0.141421	0	0.407534	0.195	0.141421	0.1				87	0	0.1	0	0	0.2	0.1	0	0	0.224	0							460	0
88	0	0.1	0.447214	0.282843	0	0	0.2	0	0.223607	0.141421				88	0	0	0	0.1	0.51	0	0	0	0.1	0							461	0
89	0	0	0.282843	0.1	0.2	0	0	0	0.2	0.1				89	0	0.41	0	0	0.224	0.224	0	0.447	0.2	0							462	0
90	0.1	0.1	0.1	0	0.1	0.1	0.107336	0	0.1	0.2				90	0	0	0	0	0.1	0	0	0.1	0.141	0							463	0
91	0	0.1	0	0.282843	0	0.1	0.321646	0	0.360555	0				91	0	0	0	0	0	0	0	0.1	0.1	0							464	0
92	0	0.1	0.282843	0.223607	0.223607	0.1	0.184459	0	0.412311	0.2				92	0	0	0	0.2	0.2	0	0	0	0	0							465	0
93	0.9	0.1	0.223607	0.223607	0.1	0	0	0	0.141421	0.1				93	0	0	0	0.14	0.361	0.1	0	0	0.141	0							466	0
94	1.47648	0.948683	0.223607	0.282843	0	0.141421	0.184459	0.140014	0.223607	0.223607				94	0	0	0	0	0.1	0.1	0	0	0	0							467	1.2083
95	0.2	0	0.282843	0	0.1	0.141421	0.107336	0.140014	0.1	0.223607				95	0	0	0	0	0.1	0.632	0	0	0.141	0							468	0
96	0.7	0.316228	0	0	0.141421	0	0	0	0.1	0				96	0	0	0	0	0	0.1	0	0	0.224	1.64							469	0
97	0.5	0	0	0.3	0	0.2	0	0.11136	0	0.223607				97	0	0	0	0	0	0	0	0	0.1	0.224							470	0
98	0.1	0	0.3	0.72111	0	0	0.1	0.1	0	0.223607				98	0	0	0	0	0	0	0	0	0.1	0							471	0
99	0	0.2	0.72111	0.141421	0.1	0	0	0.177789	0.1	0.3				99	0	0	0	0	0	0.1	0.1	0	0.1	0							472	0
100	0	0	0.141421	0	0	0	0.126823	0	0.2	0.2				100	0	0.1	0	0	0.1	0.1	0	0	0.1	0							473	0
101	0	0	0	0.141421	0.1	0	0.126823	0.11136	0.141421	0.223607				101	0	0	0	0	0	0	0	0	0	0							474	0
102	0	0	0.141421	0.223607	0.282843	0.141421	0	0.11136	0.223607	0.223607				102	0	0	0.2	0.36	0.1	0	0	0	0.1	0							475	0
103	0.141421	0.2	0.223607	0.141421	0.141421	0.223607	0	0.2	0	0.282843				103	0	0.17	0	0	0	0	0	0	0	0							476	0
104	0.2	0.1	0.141421	0.360555	0.1	0.2	0	0.195	0.223607	0.1				104	0	0.2	0	0	0.141	0.1	0	0.1	0.1	0							477	0
105	0.3	0	0.360555	0	0	0.141421	0	0.176963	0.2	0.1				105	0	0	0	0	0	0	0	0.1	0	0							478	0
106	0.141421	0.1	0	0	0	0.141421	0	0	0	0.223607				106	0	0	0	0.1	0	0.1	0	0.1	0	0							479	0
107	0.1	0	0	0.141421	0.141421	0	0	0	0	0.282843				107	0	0.27	0	0	0	0.141	0	0	0	0							480	0
108	0.141421	0	0.141421	0.1	0.2	0.1	0	0	0	0.509902				108	0	0	0	0	0.316	0.2	0.141	0	0	0							481	0
109	0.141421	0	0.1	0	0.2	0.1	0	0.110923	0	0.223607				109	0	0	0	0.14	0	0.1	0.1	0.1	0	0							482	0
110	0.1	0	0	0	0	0.1	0	0.098	0	0.447214				110	0	0.1	0	0	0	0.1	0	0	0	0							483	0
111	5.46443	0.2	0	0.360555	1.50625	0.2	0.412311	0	0.2	0				111	0	0.1	0	0	0	0	0	0	0	0							484	0.223607
112	1.74642	0	0	0.223607	0.492508	0.3	0	0.1	0.2	0.1				112	0	0	0	0	0	0.1	0	0	0	0							485	0
113	3.4	0.447214	0	0.2	1.0118	0	0.6	0.12037	0.2	0.5				113	0	0	0	0	0.2	0.2	0.1	0	0	0							486	0
114	1.43178	0	0	0.223607	0.413847	0.1	0.509902	0.1	0.3	0.3				114	0	0.13	0	0	0.1	0	0.1	0	0	0							487	0
115	1.40357	0.1	0	0.3	0.450892	0.1	0.1	0	0.223607	0.948683				115	0	0.19	0	0	0.1	0	0.1	0	0	0							488	0
116	1.99249	0.1	0	0.608276	0.675191	0.223607	0.1	0.2	0.4	0.4				116	0	0.33	0	0	0.1	0	0	0	0	0							489	0
117	1.43178	0.223607	0	0.781025	0.609103	0.223607	0.2	0	0.4	0.3				117	0	0	0	0	0	0	0	0.141	0	0							490	0
118	0.141421	0.360555	0	0.1	0.150494	0.223607	0.2	0	0.223607	0				118	0	0.1	0	0	0.1	0	0	0.1	0	0							491	0
119	1.93132	0	0	0.1	0.50783	0.141421	0.282843	0	0.141421	0				119	0	0.17	0	0.1	0	0	0	0.224	0	0							492	0
120	0.8544	0.2	0	0.3	0.3386	0.1	0	0	0.141421	0				120	0	0.1	0	0	0.1	0.1	0	0	0.1	0							493	0
121	0.223607	0.141421	0	1.00499	0.342504	0	0.2	0	0.2	0				121	0	0.1	0	0	0.224	0	0	0.1	0	0							494	0
122	1.4	0.316228	0	0.3	0.504057	0.282843	0.360555	0	0.223607	0.2				122	0	0	0	0	0.141	0	0.1	0	0.1	0							495	0
123	2.6	0.2	0	0.67082	0.867705	0.316228	0.316228	0	0.223607	0				123	0	0	0	0	0.316	0	0.2	0.1	0.141	0							496	0
124	3.82099	0	0	0.412311	1.05833	0.1	0.2	0	0.141421	0				124	0	0	0	0	0.1	0	0	0.1	0.3	0							497	0
125	4.2	0	0	0	1.05	0.223607	0.282843	0	0.141421	0.316228				125	0	0	0	0	0	0	0	0	0.2	0							498	0
126	3.29848	0.1	0	0.141421	0.884976	0.1	0.141421	0	0.2	0.608276				126	0	0.1	0	0	0	0	0	0	0	0							499	0
127	0.806226	0	0	0.2	0.251556	0.3	0.141421	0	0.3	0.223607				127	0	0	0	0	0	0	0.141	0	0.1	0							500	0
128	0.2	0	0	0.894427	0.273607	0.282843	0.2	0	0.2	0.282843				128	0	0	0	0	0	0.1	0	0	0.141	0							501	0
129	0.583095	0.1	0	0.1	0.195774	0.1	0.223607	0	0.1	0.509902				129	0	0	0	0	0.4	0	0	0	0.1	0.224							502	0
130	0.223607	0.3	0	0.608276	0.282971	0.1	0	0	0.223607	0.316228				130	0	0	0	0	0	0	0	0	0	0							503	0
131	0.223607	0.1	0	0.1	0.105902	0.141421	0.2	0	0.6	0				131	0	0	0	0	0	0	0	0	0	0							504	0
132	0.360555	0	0	0.4	0.190139	0.2	0.447214	0	0.3	0.141421				132	0	0	0	0.1	0.361	0	0	0	0.141	0							505	0
133	0.72111	0	0	0.141421	0.215633	0.1	0.2	0	0.2	0.1				133	0	0	0	0.2	0	0	0	0.1	0.2	0							506	0
134	0	0	0	0.6	0.15	0.141421	0	0	0.360555	0.632456				134	0	0	0	0	0.2	0	0.1	0	0.2	0							507	0
135	0.3	0	0.3	0.3	0.225	0.1	0.412311	0	0.2	0.223607				135	0	0	0	0.41	0.2	0	0.1	0	0.4	0							508	0
136	0.2	0	0	0.3	0.125	0.141421	0.223607	0	0	0.223607				136	0	0	0	0	0	0	0.1	0	0.2	0							509	0
137	0.447214	0	0	0.282843	0.182514	0.2	0.1	0	0.6	0				137	0	0	0	0	0	0	0	0	0	0							510	0
138	0.223607	0	0	0.2	0.105902	0.1	0.1	0	0.1	0.824621				138	0	0	0	0.1	0.141	0	0	0	0	0							511	0
139	0.761577	0.728011	0	0.1	0.397397	0.223607	0.282843	0	0.2	0				139	0	0	0	0	0.141	0	0	0	0	0							512	0
140	0.583095	0.538516	0.3	0.141421	0.390758	0.223607	0.223607	0	0.1	0				140	0	0	0	0	0.1	0	0	0	0.1	0							513	0
141	0.3	0.141421	0	0.3	0.185355	0	0.141421	0	0.223607	0				141	0	0	0	0	0.141	0	0	0	0.1	0							514	0.509902
142	0.223607	0	0	0.2	0.105902	0.1	0.1	0	0.1	0.316228				142	0	0.1	0	0	0	0	0	0	0	0							515	0
143	0.223607	0	0.1	0.538516	0.215531	0.141421	0.1	0	0	0.2				143	0	0	0	0	0.1	0	0	0	0.224	0							516	0
144	0.424264	0	0	0.223607	0.161968	0.223607	0.316228	0	0	0				144	0	0	0	0	0.1	0	0	0	0.283	0							517	0
145	0.3	0	0.1	0.4	0.2	0.1	0.2	0	0	0				145	0	0	0	0	0.1	0	0	0	0	0							518	0
146	0.360555	0	0.3	0.1	0.190139	0	0.538516	0.1	0.1	0.1				146	0	0	0	0	0	0	0.1	0	0.2	0							519	0
147	0.141421	0	0.1	0.1	0.1	0.2	0.2	0	0.1	0				147	0	0	0	0	0	0.141	0.1	0.141	0	0							520	0
148	0.509902	0	0	0.860233	0.342534	0	0.316228	0	0	0.1				148	0	0	0	0	0.1	0	0.141	0	0	0							521	0
149	0.806226	0	0	0.447214	0.31336	0.223607	0.223607	0	0.1	0.1				149	0	0	0	0	0	0.1	0.1	0	0	0							522	0
150	0.447214	0	0.447214	0.1	0.248607	0.316228	0.1	0.223607	0	0.141421				150	0	0	0	0	0	0	0.141	0	0	0							523	0
151	0.948683	0	0	0	0.237171	0	0.1	0.210924	0	0.141421				151	0	0.3	0	0	0.1	0	0.1	0	0	0							524	0
152	0.7	0	0	0.5	0.3	0.316228	0	0.1	0.1	0.2				152	0	0.1	0	0	0.2	0.1	0	0	0	0							525	0
153	0.2	0	0	0.894427	0.273607	0.316228	0	0.201	0.2	0				153	0	0	0	0	0.141	0	0	0	0	0							526	0
154	0.806226	0	0	0.4	0.301556	0.282843	0.2	0	0.3	0				154	0	0.25	0	0	0.141	0	0	0	0	0							527	0
155	0.707107	0.4	0	0.509902	0.404252	0.2	0.1	0	0.223607	0				155	0	0	0	0	0.141	0	0	0	0	0							528	0
156	0.3	0	0	0.316228	0.154057	0	0.1	0	0.141421	0				156	0.49	0	0	0	0.141	0	0	0	0.141	0							529	0
157	0.538516	0.6	0	0.412311	0.387707	0.509902	0.1	0	0.1	0				157	0.41	0	0	0	0	0	0.141	0	0.2	0							530	0
158	0.4	0	0	0.1	0.125	0.1	0.223607	0	0.141421	0.2				158	0.51	0	0	0	0.1	0.283	0	0	0	0							531	0
159	0.640312	0	0	0.4	0.260078	0	0.1	0	0.1	0.223607				159	0	0	0	0	0	0.316	0	0.1	0	0							532	0
160	0.424264	0	0	0.412311	0.209144	0.223607	0.316228	0	0.1	0.1				160	0	0	0	0	0	0	0	0	0	0							533	0
161	0.728011	0	0	0.781025	0.377259	0.223607	0.316228	0	0.1	0.1				161	0	0	0	0	0	0	0	0	0	0							534	0
162	0.1	0	0	0.1	0.1	0.1	0.282843	0	0.223607	0.141421				162	0	0	0	0	0	0.1	0	0	0	0							535	0
163	0.3	0	0	0.565685	0.216421	0.1	0.1	0.504337	0.316228	0				163	0	0	0	0	0	0.1	0	0	0	0							536	0
164	0.316228	0	0	0.1	0.104057	0	0.316228	0.2	0.1	0.4				164	0	0	0	0	0.141	0.1	0	0	0	0							537	0
165	0.583095	0	0	0.640312	0.305852	0.360555	0.316228	0.521752	0.141421	0				165	0.57	0	0	0	0	0	0	0	0	0							538	0.1
166	0	0	0.316228	0.141067	0.1	0.223607	0	0.126823	0.205915	0.3				166	0	0	0	0	0.141	0	0	0.1	0	0							539	0
167	0.3	0	0	0.125	0.3	0.1	0.2	0.203767	0.11136	0.2				167	0	0	0	0	0.2	0	0	0.361	0	0							540	0
168	3.68782	0	0.5	0.701024	0	0.1	0.1	0.309974	0.139316	0.223607				168	0	0	0	0	0.3	0	0	0	0	0							541	0
169	2.08087	0	0.6	0.494596	0.2	0	0.282843	0	0.139316	0				169	0	0	0	0	0.141	0	0	0	0.1	0							542	0
170	0.6	0	0.360555	0.291606	0.223607	0.3	0.141421	0	0.11136	0				170	0	0.1	0	0	0.1	0	0	0	0	0							543	0
171	0	0	1.11803	0.305205	0	0.1	0.1	0.184459	0.146	0.223607				171	0	0	0	0	0	0.141	0	0.1	0	0							544	0
172	0.6	0	0.6	0.290451	0.3	0.1	0	0	0.219146	0.2				172	0	0	0	0	0	0.64	0	0	0	0							545	0
173	0	0	0.141421	0.098579	0.412311	0.2	0.141421	0.117	0.11136	0.1				173	0	0.1	0	0	0.1	0.447	0	0.141	0	0							546	0
174	0	0	0	0.1	0	0.141421	0	0.126823	0.11136	0.360555				174	0	0.1	0	0	0	0.1	0	0.1	0	0							547	0
175	0.2	0	0	0.1	0.447214	0.1	0.1	0.116	0.315601	0.1				175	0	0	0	0	0	0.1	0	0	0.1	0							548	0
176	0	0	0	0.1	0.282843	0	0.141421	0.153912	0.11136	0.2				176	0	0	0	0	0	0.1	0	0	0	0							549	0
177	0	0	0	0.133376	0	0.141421	0	0	0.396187	0.1				177	0	0.27	0	0.2	0	0	0	0	0	0							550	0
178	0	0.1	0	0.119508	0.141421	0.1	0.3	0	0.11136	0.141421				178	0.41	0	0	0.1	0	0	0	0	0	0							551	0
179	0.1	0.223607	0.316228	0.135157	0.223607	0.141421	0.223607	0	0.263697	0.1				179	0	0.1	0	0.1	0	0	0	0.1	0	0							552	0
180	0	0	0	0.120512	0.360555	0.1	0	0.184459	0.176963	0.316228				180	0.1	0	0	0.78	0	0.1	0	0.1	0	0							553	0
181	0	0	0.316228	0.170741	0.316228	0.1	0.1	0.1	0.176963	0.223607				181	0.31	0	0	0	0	0	0	0	0.224	0							554	0
182	0	0	0.223607	0.148579	0.141421	0.141421	0	0	0.1	0				182	0.66	0.33	0	0.14	0	0	0	0	0.707	0							555	0
183	0	0	0.223607	0.148662	0.1	0.141421	0.1	0	0.1	0.1				183	0	3.35	0.1	0.1	0.1	0.141	0.1	0.224	0.316	0							556	0
184	0	0	0.447214	0.17259	0.141421	0.141421	0.424264	0	0.1	0				184	0	4.14	0.2	0	0.1	0	0	0	0	0							557	0.509902
185	0	0	0.1	0.1	0.2	0.2	0.3	0	0.1	0.141421				185	0	2.12	0	0.1	0.141	0	0	0.1	0	0							558	0.1
186	0	0	0.141421	0.135355	0.1	0	0.848528	0.217368	0	0.223607				186	0	1.58	0.36	0	0	0.1	0	0	0.1	0							559	0.447214
187	0	0	0.3	0.173579	0	0.141421	1.44222	0.106977	0.177789	0.2				187	0	1.7	0	0	0	0	0	0	0	0							560	0.3
188	0	0	0	0.1	0.223607	0.1	1.83576	0.232	0.196	0.1				188	0	3.2	0.1	0	0.224	0	0	0	0	0							561	0.447214
189	0	0	0	0.141804	0	0.223607	1.2083	0.145726	0.098	0				189	0	2.86	0	0	0.224	0	0	0	0	0							562	0.728011
190	0	0	0	0.11699	0	0.2	0.223607	0.35141	0.1	0				190	0	0.42	0.2	0.1	0.1	0.1	0	0	0	0.224							563	0.2
191	0	0	0	0.1	0.447214	0.3	0.781025	0.346539	0.244	0				191	0	0.54	0	0	0	0	0	0	0.1	0							564	0.223607
192	0	0	0.141421	0.130178	0.223607	0.1	0.447214	0.447214	0.303975	0.1				192	0	1.9	0	0	0	0	0	0	0	0							565	0.4
193	0	0	0	0.140578	0.316228	0.2	0.5	1.11803	0.11136	0				193	0	2.98	0	0	0	0.1	0	0	0	0							566	0.3
194	0	0	0	0.1	0	0.2	0.1	1.28062	0.195	0.1				194	0	2.61	0	0	0	0	0	0	0	0							567	0.412311
195	0	0	0	0.1	0.223607	0.223607	0.316228	0.424264	0	0				195	0	1.8	0	0	0	0.1	0	0	0	0							568	0.223607
196	0	0	0	0.1	0.412311	0.1	0.412311	0.282843	0.334079	0.1				196	0	0.81	0	0	0	0	0	0	0	0.1							569	0.282843
197	0	0	0	0.1	0.141421	0.223607	0.282843	0.6	0	0.141421				197	0	2.31	0	0.1	0	0	0	0.141	0	0							570	0.5
198	0	0	0	0.1	0.2	0.360555	0.1	0.282843	0.22272	0				198	1.21	2.62	0	0.2	0	0	0.1	0.141	0	0.141							571	0.412311
199	0	0	0	0.1	0	0.223607	0.1	0	0.303975	0.141421				199	0.19	1.86	0	0	0	0	0	0.1	0	0							572	0.4
200	0	0	0	0	0	0	0.1	0.141421	0.27933	0.1				200	0.5	0.57	0	0.22	0	0	0.141	0.447	0	0							573	0.412311
201	0	0.1	0	0.11319	0.4	0.1	0.5	0.5	0.1	0				201	0	0	0	0	0	0	0	0.1	0	0.5							574	0.608276
202	0	0	0	0.1	0.316228	0.1	0	0.316228	0.11136	0.1				202	0	0	0	0	0	0	0	0.1	0	0							575	0.4
203	0	0	0.538516	0.119343	0.223607	0.223607	0	0.894427	0.11136	0.141421				203	0	0	0	0.14	0	0	0	0	0.1	0							576	1.76918
204	0	0	0.316228	0.12043	0.447214	0.3	0	0.4	0.4	0.141421				204	0	0	0	0	0	0	0	0	0.1	0							577	2.51794
205	0.3	0	0.316228	0.174685	0	0.1	0.2	0.316228	0.502395	0				205	0	0.13	0	0.32	0	0	0	0	0.1	0							578	1.64924
206	0	0	0	0.1	0.412311	0.1	0.141421	0.360555	0.22272	0				206	0	0.1	0	0	0	0.806	0	0	0.1	0							579	0.984886
207	0	0	0.1	0.097903	0.412311	0.1	0.1	0.447214	0.219146	0.1				207	0	0	0.32	0	0	0	0	0	0.141	0							580	1
208	0.1	0	0.1	0.114653	0.141421	0.141421	0.223607	0.282843	0.140014	0.1				208	0	1.2	0	0.1	0	0	0	0.1	0.1	0							581	1.48661
209	0.1	0	0.1	0.122855	0	0.2	0.1	0.223607	0.219146	0.223607				209	0	0.13	0	0	0	0	0	0.224	0	0							582	0.7
210	0	0	0	0.1	0.412311	0	0	0.1	0	0.141421				210	0	0.53	0	0	0.1	0	0.1	0	0	0							583	1.56205
211	0.447214	0	0.223607	0.11403	0.2	0.223607	0.1	0.2	0.27933	0.1				211	0	0	0	0	0.2	0	0	0.2	0.1	0							584	1.5
212	0.4	0	0	0.138738	0.2	0.1	0.223607	0.2	0	0.141421				212	0	0	0	0	0	0	0	0.424	0	0							585	1.70294
213	0.1	0	0.2	0.120629	0	0.1	0.223607	0.360555	0.22272	0.1				213	0	0.62	0	0	0	0	0	0.1	0.1	0.283							586	1.70294
214	0.1	0	0	0.1	0	0.360555	0.1	0	0.139316	0				214	0	0.76	0	0	0.141	0	0.141	0	0	0							587	0.1
215	0.640312	0	0	0.172518	0.640312	0.509902	0.1	0.2	0.11136	0				215	0	0	0	0	0	0	0	0.141	0	0							588	0.1
216	0	0	0	0.1	0.632456	0.640312	0.1	0.1	0.177789	0.1				216	0	0	0	0.32	0	0	0	0.1	0.141	0							589	1.27279
217	0	0	0	0.1	0	0.7	0.1	0.1	0.315493	0.141421				217	0	0	0	0	0.141	0	0	0.1	0	0							590	0.509902
218	0	0	0	0.127571	0.141421	1.60312	0.141421	0	0.3	0				218	0	0	0	0	0.141	0	0	0.2	0	0							591	0.223607
219	0	0	0	0.127028	0	0.509902	0.141421	0	0.205915	0.1				219	0	0	0	0	0.1	0	0.283	0.1	0	0							592	0.3
220	0	0	0.5	0.229995	0.5	0.282843	0.223607	0.1	0.205915	0.223607				220	0	0	0	0.1	0	0	0	0	0	0							593	0.316228
221	0	0.3	0.1664	0	0.360555	0	0	0	0.103369	0.640312				221	0	0	0.1	0	0	0	0.1	0.1	0.2	0							594	1.4
222	0.141421	0	0.210924	0.2	0	0.141421	0	0.223607	0.114672	0.3				222	0	0.3	0.42	0	0	0	0	0	0	0							595	2.0025
223	0.141421	0	0	0	0	0	0	0.1	0	0				223	0	0	0.14	0	0	0	0	0	0	0							596	0.3
224	0.1	0.2	0	0.141421	0	0	0	0.223607	0.1	0.1				224	0	0.1	0	0	0	0	0	0	0	0							597	0.7
225	0.141421	0.2	0	0.1	0	0	0.316228	0.1	0.107206	0				225	0	0	0	0	0	0	0	0.2	0	0.1							598	1.21655
226	0.1	0.1	0	0.1	0	0	0	0.1	0	0				226	0	0	0	0	0	0	0	0.224	0	0							599	0.3
227	0.1	0.2	0	0.1	0.1	0	0	0	0	0.1				227	0	0	0	0	0	0	0	0	0	0							600	1.04403
228	0.3	0.141421	0.802718	0.2	0.2	0.1	0	0	0.218017	0				228	0	0	0	0	0.3	0	0	0	0	0							601	2.60192
229	0.141421	0.1	0.836794	0.360555	0	0	0	0	0.179846	0.1				229	0	0	0	0	0.906	0	0	0	0	0							602	2.21359
230	0	0.2	0.508944	0.316228	0	0.1	0	0.412311	0.192185	0				230	0	0	0	0	0.1	0	0	0	0	0							603	1.1
231	0.1	0.2	0.348649	0.1	0	0.282843	0	0.2	0.153936	0.3				231	0	0	0	0	0.224	0	0	0	0	0							604	0.806226
232	0.2	0.2	0.307391	0.707107	0.2	0	0	0.1	0.214312	0.223607				232	0	0	0	0	0.728	0	0	0	0	0							605	0.223607
233	0.141421	0	0.224502	0.316228	0.223607	0.2	0	0	0.13822	0				233	0	0	0	0	0.412	0	0	0	0	0							606	0.806226
234	0.223607	0.360555	0.2	0.3	0.1	0.509902	0	0	0.211758	0.141421				234	0	0	0	0	0	0	0	0	0	0							607	1
235	0.360555	0.3	1.17081	0.447214	0.2	0.282843	0	0	0.345178	0.1				235	0	0	0	0	0	0	1.676	0	0.1	0							608	1.06302
236	0.1	1.07703	0.601295	0.761577	0.360555	0.1	0	0	0.375058	0.3				236	0	0	0	0	0	0	0.3	0.1	0.3	0							609	0
237	0.223607	0.894427	0	0.360555	0.608276	0.1	0	0	0.273358	0.1				237	0	0	0	0	0	0	0.1	0.1	0.224	0							610	0.4
238	0.1	1.0198	0.2	0.6	0.412311	0.1	0	0	0.304014	0.141421				238	0	0	0	0	0	0.1	0.316	0.1	0	2.025							611	0.447214
239	0	0.412311	0	0.3	0.2	0	0	0	0.114039	0.3				239	0	0	0	0	0	0	0.316	0	0	2.202							612	1.3
240	0	0	0	0	0	0	0	0	0	0				240	0	0	0	0	0	0	0.283	0	0	2.309							613	1.16619
																															614	0.921954
																															615	1.36015
																															616	1.83576
																															617	2.60768
																															618	1.64012
																															619	2.90689
																															620	2.90172
																															621	1.58114
																															622	1.21655
																															623	6.70075
																															624	2.16333
																															625	3.01496
																															626	2.03961
																															627	1.50333
																															628	1.86815
																															629	3.03339
																															630	2.72556
																															631	2.814
																															632	1.1461
