# Supplementary material for: Long-term study of behaviors of two cohabiting sea urchin species, Mesocentrotus nudus and Strongylocentrotus intermedius, under conditions of high food quantity and predation risk in situ
Source: PeerJ. 2019 Nov 22;7:e8087. doi: 10.7717/peerj.8087 (PMC6876488; doi:10.7717/peerj.8087)
Supplement: Supplemental Information 5 — The data are extracted from Table S1. The stormy periods when M. nudus specimens were absent on the feeders due to their removal or escape response to presentation of crushed conspecifics were excluded from statistical analysis. [file peerj-07-8087-s005.xlsx]

## Sheet: Лист1
										One-way ANOVA followed by Tukey's multiple comparisons test
Date	Before storm (BS)	During storm (DS)	After storm (AS)
						Table Analyzed	Data 14 - M. nudus numbers before, during and after storm (2014-2016)
Storm 1 ( August 04-August 06, 2014)	46	36	18												Number of families	1
	46	3	21			ANOVA summary									Number of comparisons per family	3
	45		22			F	18.2								Alpha	0.05
	43		21			P value	< 0,0001
						P value summary	****								Tukey's multiple comparisons test	Mean Diff,	95% CI of diff,	Significant?	Summary
Storm 2 ( August 22-August 24, 2014)	49	66	48			Are differences among means statistically significant? (P < 0.05)	Yes
	63	34	53			R square	0.4072								M. nudus BS 2014-2016 vs. M. nudus DS 2014-2016	27.76	16,00 to 39,51	Yes	****
	62	44	44												M. nudus BS 2014-2016 vs. M. nudus AS 2014-2016	7.604	-4,686 to 19,89	No	ns
	67	23	65			Brown-Forsythe test									M. nudus DS 2014-2016 vs. M. nudus AS 2014-2016	-20.15	-31,52 to -8,784	Yes	***
		26				F (DFn, DFd)	2,088 (2, 53)
		54				P value	0.1341
						P value summary	ns								Test details	Mean 1	Mean 2	Mean Diff,	SE of diff,	n1	n2	q	DF
						Significantly different standard deviations? (P < 0.05)	No
															M. nudus BS 2014-2016 vs. M. nudus DS 2014-2016	54.94	27.18	27.76	4.874	16	22	8.054	53
Storm 3 (September 09-September 11, 2015)	71	6	68			Bartlett's test									M. nudus BS 2014-2016 vs. M. nudus AS 2014-2016	54.94	47.33	7.604	5.097	16	18	2.11	53
	66	3	74			Bartlett's statistic (corrected)	9.886								M. nudus DS 2014-2016 vs. M. nudus AS 2014-2016	27.18	47.33	-20.15	4.714	22	18	6.045	53
	53	9				P value	0.0071
	32					P value summary	**
						Significantly different standard deviations? (P < 0.05)	Yes
Storm 4 ( August 04-August 06, 2016)	65	26	45
	60	7	52			ANOVA table	SS	DF	MS	F (DFn, DFd)	P value
	61	11	54			Treatment (between columns)	8011	2	4006	F (2, 53) = 18,20	P < 0,0001
	54		52			Residual (within columns)	11662	53	220
						Total	19674	55
Storm 5 ( August 11-August 13, 2016)	53	32	55
	58	33	48			Data summary
	55	23	55			Number of treatments (columns)	3
	52	22	57			Number of values (total)	56
		25
		26
		37
		52
