# Supplementary material for: Long-term study of behaviors of two cohabiting sea urchin species, Mesocentrotus nudus and Strongylocentrotus intermedius, under conditions of high food quantity and predation risk in situ
Source: PeerJ. 2019 Nov 22;7:e8087. doi: 10.7717/peerj.8087 (PMC6876488; doi:10.7717/peerj.8087)
Supplement: Supplemental Information 6 — The data are extracted from Table S1. The stormy periods which directly followed the experiments with application of other disturbing stimuli such as removal of M. nudus from the feeders or presentation of crushed M. nudus specimens were excluded from statistical analysis. [file peerj-07-8087-s006.xlsx]

## Sheet: Лист1
Date	Before storm (BS)	During storm (DS)	After storm (AS)							Kruskal-Wallis test followed by Dunn's multiple comparisons test
Storm 1 ( August 04-August 06, 2014)	60	21	60
	58		59			Table Analyzed	Data 15 - S. intermedius numbers before, during and after storm (2014-2016)
	56		55												Number of families	1
	49		62			Kruskal-Wallis test									Number of comparisons per family	3
						P value	< 0,0001								Alpha	0.05
Storm 2 ( August 10-August 12, 2014)	54	59	41			Exact or approximate P value?	Approximate
	55	59	52			P value summary	****								Dunn's multiple comparisons test	Mean rank diff,	Significant?	Summary
	59	55	55			Do the medians vary signif. (P < 0.05)	Yes
	57	37	58			Number of groups	3								S. intermedius BS 2014-2016 vs. S. intermedius DS 2014-2016	43.37	Yes	****
		27				Kruskal-Wallis statistic	47.22								S. intermedius BS 2014-2016 vs. S. intermedius AS 2014-2016	-5.019	No	ns
		28													S. intermedius DS 2014-2016 vs. S. intermedius AS 2014-2016	-48.39	Yes	****
		49				Data summary
		49				Number of treatments (columns)	3
		45				Number of values (total)	124								Test details	Mean rank 1	Mean rank 2	Mean rank diff,	n1	n2
		40
															S. intermedius BS 2014-2016 vs. S. intermedius DS 2014-2016	77.6	34.23	43.37	44	47
Storm 3 ( August 22-August 24, 2014)	64	40	63												S. intermedius BS 2014-2016 vs. S. intermedius AS 2014-2016	77.6	82.62	-5.019	44	33
	53	43	63												S. intermedius DS 2014-2016 vs. S. intermedius AS 2014-2016	34.23	82.62	-48.39	47	33
	56	39	62
	49	39	66
		41
		62
Storm 4 (September 03-September 06, 2014)	63	55	64
	62	11	63
	57	7	64
	57	5	63
		9
		14
		17
		18
		21
		33
		59
Storm 5 (September 09-September 11, 2015)	113	75	87
	121	46	84
	115	49	126
	133		115
Storm 6 (September 30-October 01, 2015)	144	100	125
	158	35	145
	154	29	147
	142	39	153
		66	160
Storm 7 ( August 04-August 06, 2016)	44	41	36
	50	26	49
	52	19	53
	46		55
Storm 8 ( August 11-August 13, 2016)	67	54	48
	60	45	47
	49	23	52
	50	14	51
		11
		12
		33
		45
