# Supplementary material for: Long-term study of behaviors of two cohabiting sea urchin species, Mesocentrotus nudus and Strongylocentrotus intermedius, under conditions of high food quantity and predation risk in situ
Source: PeerJ. 2019 Nov 22;7:e8087. doi: 10.7717/peerj.8087 (PMC6876488; doi:10.7717/peerj.8087)
Supplement: Supplemental Information 8 — The data of four experiments conducted during long-term recordings of 2014–2016 (Table S1) are presented as the numbers and percentages of sea urchins per 1 h for the period of 11 h after the crushing of conspecifics near the feeders. The average number of sea urchins for 24 h period before the beginning of the experiment is considered to be 100%. The data are extracted from Table S1. Experiment conducted on September 16, 2014 was not included into statistical analysis because it might be influenced by the experiment on storm imitation conducted 3 days earlier, on September 13, 2014. [file peerj-07-8087-s008.xlsx]

## Sheet: Лист1
		Time after crushing, h
Experiment No. and date	24 h before crushing		1		2		3		4		5		6		7		8		9		10		11
	Number	%	Number	%	Number	%	Number	%	Number	%	Number	%	Number	%	Number	%	Number	%	Number	%	Number	%	Number	%
Experiment 1 (August 28, 2014)	61	100	45	74	24	39	9	15	4	7	4	7	4	7	1	2	2	3	0	0	0	0	0	0
Experiment 2 (September 08, 2014)	58	100	60	103	22	40	17	29	5	9	3	5	4	7	1	2	1	2	0	0	0	0	0	0
Experiment 3 (September 11, 2015)	71	100	50	70	45	63	29	41	11	15	4	6	2	3	4	6	1	1	0	0	0	0	0	0
Experiment 4 (August 26, 2016)	73	100	42	58	17	23	17	23	4	5	4	5	4	5	9	12	3	4	0	0	0	0	0	0
		Nonlinear regression (curve fit) of data on the absolute numbers of M. nudus per 1 h after crushing of conspecifics											Nonlinear regression (curve fit) of data on the relative numbers of M. nudus per 1 h after crushing of conspecifics
		Sigmoidal, 4PL, X is log(concentration)											Sigmoidal, 4PL, X is log(concentration)
		Best-fit values											Best-fit values
		Top	92.28										Top	134.8
		Bottom	0.9679										Bottom	1.584
		LogIC50	1.065										LogIC50	1.189
		HillSlope	-0.3722										HillSlope	-0.3899
		IC50	11.62										IC50	15.47
		Span	91.31										Span	133.2
		Std. Error											Std. Error
		Top	18.56										Top	23.29
		Bottom	1.175										Bottom	1.712
		LogIC50	0.5412										LogIC50	0.4574
		HillSlope	0.07397										HillSlope	0.07377
		Span	19.05										Span	23.97
		95% Confidence Intervals											95% Confidence Intervals
		Top	54,85 to 129,7										Top	87,83 to 181,8
		Bottom	-1,401 to 3,337										Bottom	-1,869 to 5,038
		LogIC50	-0,02619 to 2,157			Nonlinear regression of data on the absolute numbers of M. nudus.							LogIC50	0,2669 to 2,112			Nonlinear regression of data on the relative numbers of M. nudus.
		HillSlope	-0,5213 to -0,2230			Data are presented as median and range.							HillSlope	-0,5387 to -0,2411			Data are presented as median and range.
		IC50	0,9415 to 143,5										IC50	1,849 to 129,4
		Span	52,90 to 129,7										Span	84,87 to 181,6
		Goodness of Fit											Goodness of Fit
		Degrees of Freedom	44										Degrees of Freedom	44
		R square	0.9454										R square	0.9482
		Absolute Sum of Squares	1199										Absolute Sum of Squares	2655
		Sy.x	5.22										Sy.x	7.769
		Number of points											Number of points
		Analyzed	48										Analyzed	48
