# Supplementary material for: Long-term study of behaviors of two cohabiting sea urchin species, Mesocentrotus nudus and Strongylocentrotus intermedius, under conditions of high food quantity and predation risk in situ
Source: PeerJ. 2019 Nov 22;7:e8087. doi: 10.7717/peerj.8087 (PMC6876488; doi:10.7717/peerj.8087)
Supplement: Supplemental Information 9 — The data from four experiments conducted during long-term recordings of 2014–2016 (Table S1) are presented as the average numbers and percentages of sea urchins per 6 h for the period of 60 h after their removal from the feeder. The average number of sea urchins for 24 h period before the removal is considered to be 100%. The data are extracted from Table S1. The experiments conducted on August 09, 2014, August 14, 2014 and August 20, 2016 were not included into statistical analysis because they might be influenced by the previous or next storm. [file peerj-07-8087-s009.xlsx]

## Sheet: Лист1
			Time after removal, h
Experiment No. and date	24 h before removal		0		6		12		18		24		30		36		42		48		54		60
	Number	%	Number	%	Number	%	Number	%	Number	%	Number	%	Number	%	Number	%	Number	%	Number	%	Number	%	Number	%
Experiment 1 (August 19, 2014)	54	100	0	0	24	44	38	70	46	85	51	94	54	100	57	106	66	122	63	117	53	98	60	111
Experiment 2 (August 25, 2014)	59	100	0	0	0	0	8	14	17	29	19	32	23	39	26	44	28	47	39	66	45	76	49	83
Experiment 3 (September 01, 2015)	40	100	0	0	7	18	31	78	33	83	34	85	43	108	47	118	44	110	47	118	47	118	49	122
Experiment 4 (September 06, 2015)	56	100	0	0	7	18	14	25	26	46	47	84	50	89	55	98	53	97	71	127	66	118	53	95
	Nonlinear regression (curve fit) of data on the absolute numbers of M. nudus per 6 h after their removal from the feeders.									Nonlinear regression (curve fit) of data on the relative numbers of M. nudus per 6 h after their removal from the feeders.
	Sigmoidal, 4PL, X is log(concentration)									Sigmoidal, 4PL, X is log(concentration)
	Best-fit values									Best-fit values
	Top	55.57								Top	108.2
	Bottom	-57.98								Bottom	-134.6
	LogIC50	-0.3816								LogIC50	-3.062
	HillSlope	0.02967								HillSlope	0.02928
	IC50	0.4153								IC50	0.0008672
	Span	113.6								Span	242.7
	Std. Error									Std. Error
	Top	7.444								Top	15.83
	Bottom	164.3								Bottom	463.4
	LogIC50	39.19								LogIC50	51.05
	HillSlope	0.02466								HillSlope	0.02767
	Span	170.1								Span	475.7
	95% Confidence Intervals									95% Confidence Intervals
	Top	40,53 to 70,62								Top	76,16 to 140,2
	Bottom	-390,0 to 274,0								Bottom	-1071 to 801,9
	LogIC50	-79,58 to 78,82								LogIC50	-106,2 to 100,1
	HillSlope	-0,02017 to 0,07952								HillSlope	-0,02664 to 0,08519
	IC50	0,0 to +infinity								IC50	0,0 to +infinity
	Span	-230,2 to 457,3								Span	-718,7 to 1204
	Goodness of Fit									Goodness of Fit				Nonlinear regression of data on the relative numbers of M. nudus.
	Degrees of Freedom	40		Nonlinear regression of data on the absolute numbers of M. nudus.						Degrees of Freedom	40			Data are presented as median and range.
	R square	0.731		Data are presented as median and range.						R square	0.6902
	Absolute Sum of Squares	4994								Absolute Sum of Squares	22778
	Sy.x	11.17								Sy.x	23.86
	Number of points									Number of points
	Analyzed	44								Analyzed	44
