# Supplementary material for: Long-term study of behaviors of two cohabiting sea urchin species, Mesocentrotus nudus and Strongylocentrotus intermedius, under conditions of high food quantity and predation risk in situ
Source: PeerJ. 2019 Nov 22;7:e8087. doi: 10.7717/peerj.8087 (PMC6876488; doi:10.7717/peerj.8087)
Supplement: Supplemental Information 11 — The data are presented as the numbers of sea urchins on the feeder and their percentages from the average number calculated as the mean of sea urchins which were present on the feeder during 21 h before the beginning of the treatment (indicated by red color). Nonlinear regression of data on the numbers of sea urchins during the period from 22 h (the moment of treatment) to 45 h was performed. [file peerj-07-8087-s011.xlsx]

## Sheet: Лист1
Experiment No.	Mean number for 0-21 h	0 h		4 h		8 h		12 h		16 h		20 h		21 h		22 h		23 h		24 h		25 h		26 h		27 h		28 h		29 h		30 h		31 h		32 h		33 h		37 h		41 h		45 h		49 h		53 h
		Number	%	Number	%	Number	%	Number	%	Number	%	Number	%	Number	%	Number	%	Number	%	Number	%	Number	%	Number	%	Number	%	Number	%	Number	%	Number	%	Number	%	Number	%	Number	%	Number	%	Number	%	Number	%	Number	%	Number	%
Experiment 1	37	39	105	37	100	40	108	35	95	37	100	34	92	36	97	36	97	27	73	17	46	9	24	2	5	7	19	1	2.77	0	0	0	0	0	0	0	0	0	0	0	0	0	0	0	0	0	0	0	0
Experiment 2	34	33	97	34	100	36	106	32	94	35	103	36	106	34	100	36	106	29	86	17	50	12	35	2	6	5	15	3	9	0	0	0	0	0	0	0	0	0	0	0	0	0	0	0	0	0	0	0	0
Experiment 3	39	39	100	40	103	40	103	41	105	38	97	39	100	39	100	35	90	25	64	21	54	8	21	4	10	7	18	4	10	0	0	0	0	0	0	0	0	0	0	0	0	0	0	0	0	0	0	0	0
Experiment 4	32	34	106	35	109	31	97	32	100	30	94	32	100	32	100	32	100	25	78	19	59	10	31	3	9	3	9	0	0	0	0	0	0	0	0	0	0	0	0	0	0	0	0	0	0	0	0	0	0
	Nonlinear regression (curve fit) of data on the absolute numbers of M. nudus after crushing of conspecifics										Nonlinear regression (curve fit) of data on the relative numbers of M. nudus after crushing of conspecifics
	Sigmoidal, 4PL, X is log(concentration)										Sigmoidal, 4PL, X is log(concentration)
	Best-fit values										Best-fit values
	Top	47.95									Top	128.3
	Bottom	0.06219									Bottom	0.2484
	LogIC50	2.3									LogIC50	2.448
	HillSlope	-0.34									HillSlope	-0.3545
	IC50	199.5									IC50	280.5
	Span	47.89									Span	128.1
	Std. Error										Std. Error
	Top	4.92									Top	12.15
	Bottom	0.3029									Bottom	0.8762
	LogIC50	0.3049									LogIC50	0.2783
	HillSlope	0.03535									HillSlope	0.03778
	Span	5.03									Span	12.46
	95% Confidence Intervals										95% Confidence Intervals
	Top	38,09 to 57,81									Top	104,0 to 152,7
	Bottom	-0,5448 to 0,6692									Bottom	-1,508 to 2,004
	LogIC50	1,689 to 2,911									LogIC50	1,890 to 3,006
	HillSlope	-0,4108 to -0,2691									HillSlope	-0,4302 to -0,2788
	IC50	48,84 to 814,8		Nonlinear regression of data on the absolute numbers of M. nudus							IC50	77,66 to 1013			Nonlinear regression of data on the relative numbers of M. nudus
	Span	37,80 to 57,97		after crushing of conspecifics. Data are presented as median and range.							Span	103,1 to 153,1			after crushing of conspecifics. Data are presented as median and range.
	Goodness of Fit										Goodness of Fit
	Degrees of Freedom	56									Degrees of Freedom	56
	R square	0.9791									R square	0.9773
	Absolute Sum of Squares	148.5									Absolute Sum of Squares	1276
	Sy.x	1.629									Sy.x	4.774
	Number of points										Number of points
	Analyzed	60									Analyzed	60
[truncated: 12 more columns]
