# Supplementary material for: Long-term study of behaviors of two cohabiting sea urchin species, Mesocentrotus nudus and Strongylocentrotus intermedius, under conditions of high food quantity and predation risk in situ
Source: PeerJ. 2019 Nov 22;7:e8087. doi: 10.7717/peerj.8087 (PMC6876488; doi:10.7717/peerj.8087)
Supplement: Supplemental Information 12 — The data are presented as the numbers of sea urchins on the feeder and their percentages from the average number calculated as the mean of sea urchins which were present on the feeder during 21 h before the beginning of the treatment (indicated by red color). [file peerj-07-8087-s012.xlsx]

## Sheet: Лист1
Experiment No.	Mean number for 0-21 h	0 h		4 h		8 h		12 h		16 h		20 h		21 h		22 h		23 h		24 h		25 h		26 h		27 h		28 h		29 h		30 h		31 h		32 h		33 h		37 h		41 h		45 h		49 h		53 h
		Number	%	Number	%	Number	%	Number	%	Number	%	Number	%	Number	%	Number	%	Number	%	Number	%	Number	%	Number	%	Number	%	Number	%	Number	%	Number	%	Number	%	Number	%	Number	%	Number	%	Number	%	Number	%	Number	%	Number	%
Experiment 1	29.5	27	90	32	107	37	123	25	83	28	93	29	97	27	90	31	103	32	107	31	103	34	113	39	130	38	127	39	130	37	123	37	123	37	123	35	117	34	113	31	103	33	111	31	103	29	97	28	93
Experiment 2	33.25	28	85	35	106	35	106	26	79	36	109	34	103	35	106	37	112	38	115	39	118	37	112	36	109	38	115	37	112	35	106	38	115	40	121	39	118	37	112	39	118	36	109	34	103	35	106	35	106
Experiment 3	33.25	34	103	34	103	37	112	27	82	26	79	36	109	34	103	38	115	34	103	38	115	35	106	37	112	37	112	34	103	31	94	32	97	34	103	31	94	34	103	28	85	34	103	33	100	34	103	37	112
Experiment 4	36.375	35	97	38	106	40	111	37	103	30	83	36	100	37	103	38	106	35	97	38	106	35	97	32	89	31	86	30	83	34	94	35	97	34	94	36	100	35	97	34	94	36	100	34	94	31	86	32	89
	Linear regression of data on the absolute numbers of M. nudus after crushing of heterospecifics											Linear regression of data on the relative numbers of M. nudus after crushing of heterospecifics
	Best-fit values											Best-fit values
	Slope	0,02262 ± 0,01615										Slope	0,08259 ± 0,05753
	Y-intercept when X=0.0	33,59 ± 0,6744										Y-intercept when X=0.0	101,6 ± 2,402
	X-intercept when Y=0.0	-1485										X-intercept when Y=0.0	-1230
	1/slope	44.2										1/slope	12.11
	95% Confidence Intervals											95% Confidence Intervals
	Slope	-0,009365 to 0,05461										Slope	-0,03135 to 0,1965
	Y-intercept when X=0.0	32,25 to 34,92										Y-intercept when X=0.0	96,87 to 106,4
	X-intercept when Y=0.0	-infinity to -593,5										X-intercept when Y=0.0	-infinity to -495,6
	Goodness of Fit											Goodness of Fit
	R square	0.01636					Time (h)					R square	0.01717					Time (h)
	Sy.x	3.556										Sy.x	12.67
	Is slope significantly non-zero?			Linear regression of data on the absolute numbers of M. nudus. Upside down triangle denotes								Is slope significantly non-zero?			Linear regression of data on the relative numbers (%) of M. nudus. Upside down triangle denotes
	F	1.962		the moment of treatment. Data are presented as median and range.								F	2.061		the moment of treatment. Data are presented as median and range.
	DFn, DFd	1,000, 118,0										DFn, DFd	1,000, 118,0
	P value	0.1639										P value	0.1537
	Deviation from zero?	Not Significant										Deviation from zero?	Not Significant
	Data											Data
	Number of X values	30										Number of X values	30
	Maximum number of Y replicates	4										Maximum number of Y replicates	4
	Total number of values	120										Total number of values	120
	Number of missing values	196										Number of missing values	196
	Equation	Y = 0,02262*X + 33,59										Equation	Y = 0,08259*X + 101,6
[truncated: 12 more columns]
