# Supplementary material for: Long-term study of behaviors of two cohabiting sea urchin species, Mesocentrotus nudus and Strongylocentrotus intermedius, under conditions of high food quantity and predation risk in situ
Source: PeerJ. 2019 Nov 22;7:e8087. doi: 10.7717/peerj.8087 (PMC6876488; doi:10.7717/peerj.8087)
Supplement: Supplemental Information 13 — The time of treatment is indicated by red color. [file peerj-07-8087-s013.xlsx]

## Sheet: Лист1
Experiment No.	0 h	4 h	8 h	12 h	16 h	20 h	21 h	22 h	23 h	24 h	25 h	26 h	27 h	28 h	29 h	30 h	31 h	32 h	33 h	37 h	41 h	45 h	49 h	53 h	57 h	61 h	65 h	69 h	73 h	77 h
Experiment 1	1.4	1.6	1.16	1	1.33	1.12	0.96	1.03	1.19	1.29	1.21	1.77	1.81	1.39	1.42	1.42	1.61	1.4	1.31	1.63	1.1	1.11	1.53	1.04	1.54	1.56	1.31	1.6	1.38	1.46
Experiment 2	1.12	1.46	1.75	1.08	1.71	2	1.17	1.48	2.24	1.34	1.48	1.57	1.46	1.54	1.46	1.41	1.9	1.5	1.32	1.39	1.5	1.31	1.75	1.59	1.63	1.5	1.95	1.42	1.3	1.37
Experiment 3	1.26	1.31	1.37	1.42	1.04	1.38	1.36	1.46	1.7	1.65	1.35	1.95	1.85	1.55	0.94	1.07	1.31	1.29	1.55	1.33	1.26	1.27	1.21	1.68	1.35	1.33	1.46	1.79	1.14	1.28
Experiment 4	1.35	1.31	1.33	1.76	1.3	1.33	2.18	2.11	1.35	1.27	1.46	1.14	1.24	1.76	1.55	1.07	1.26	1.8	1.52	1.26	1.89	1.26	1.55	1.23	1.57	1.29	1.3	1.15	1.53	1.47
	Comparison of the mean group size before (0-21 h) and after (22-33 h and 37-77h) treatment
									Kruskal-Wallis test followed by Dunn's multiple comparisons test
	0-21 h	22-33 h	37-77 h
	1.4	1.19	1.63
	1.12	2.24	1.39				Table Analyzed	Data 34 - Comparison of the mean group size before (0-21 h) and after (22-33 h and 37-77h) treatment						Number of families	1
	1.26	1.7	1.33											Number of comparisons per family	3
	1.35	1.35	1.26				Kruskal-Wallis test							Alpha	0.05
	1.6	1.29	1.1				P value	0.2799
	1.46	1.34	1.5				Exact or approximate P value?	Approximate						Dunn's multiple comparisons test	Mean rank diff,	Significant?	Summary
	1.31	1.65	1.26				P value summary	ns
	1.31	1.27	1.89				Do the medians vary signif. (P < 0.05)	No						0-21 h vs. 22-33 h	-12.88	No	ns
	1.16	1.21	1.11				Number of groups	3						0-21 h vs. 37-77 h	-6.898	No	ns
	1.75	1.48	1.31				Kruskal-Wallis statistic	2.547						22-33 h vs. 37-77 h	5.977	No	ns
	1.37	1.35	1.27
	1.33	1.46	1.26				Data summary
	1	1.77	1.53				Number of treatments (columns)	3						Test details	Mean rank 1	Mean rank 2	Mean rank diff,	n1	n2
	1.08	1.57	1.75				Number of values (total)	120
	1.42	1.95	1.21											0-21 h vs. 22-33 h	53.25	66.13	-12.88	32	44
	1.76	1.14	1.55											0-21 h vs. 37-77 h	53.25	60.15	-6.898	32	44
	1.33	1.81	1.04											22-33 h vs. 37-77 h	66.13	60.15	5.977	44	44
	1.71	1.46	1.59
	1.04	1.85	1.68
	1.3	1.24	1.23
	1.12	1.39	1.54
	2	1.54	1.63
	1.38	1.55	1.35
	1.33	1.76	1.57
	0.96	1.42	1.56
	1.17	1.46	1.5
	1.36	0.94	1.33
	2.18	1.55	1.29
	1.03	1.42	1.31
	1.48	1.41	1.95
	1.46	1.07	1.46
	2.11	1.07	1.3
		1.61	1.6
		1.9	1.42
		1.31	1.79
		1.26	1.15
		1.4	1.38
		1.5	1.3
		1.29	1.14
		1.8	1.53
		1.31	1.46
		1.32	1.37
		1.55	1.28
		1.52	1.47
