# Supplementary material for: Long-term study of behaviors of two cohabiting sea urchin species, Mesocentrotus nudus and Strongylocentrotus intermedius, under conditions of high food quantity and predation risk in situ
Source: PeerJ. 2019 Nov 22;7:e8087. doi: 10.7717/peerj.8087 (PMC6876488; doi:10.7717/peerj.8087)
Supplement: Supplemental Information 14 — The time of treatment is indicated by red color. [file peerj-07-8087-s014.xlsx]

## Sheet: Лист1
Experiment No.	0 h	4 h	8 h	12 h	16 h	20 h	21 h	22 h	23 h	24 h	25 h	26 h	27 h	28 h	29 h	30 h	31 h	32 h	33 h	37 h	41 h	45 h	49 h	53 h	57 h	61 h	65 h	69 h	73 h	77 h
Experiment 1	2.06	2.92	2.83	2	2.13	2.33	2.69	1.94	3.27	8.25	7	7.4	5.83	6.33	5.43	3.27	4.88	5.88	6.8	4.63	2.53	2.69	1.68	2.14	2.43	2.58	2.54	3	3.11	2.43
Experiment 2	1.04	1.4	1.6	1.69	1.4	2	1.69	1.87	1.93	6.75	9	9.67	7	7	7	6.76	7.25	6.25	6.5	4.14	2.6	3.7	1.63	1.8	1.56	1.63	1.93	2.4	2.3	1.87
Experiment 3	3.18	3.17	3	4.75	2.75	1.67	2.36	2	3	5.67	5.14	7	4.25	5.83	3.89	5.67	5.83	6.83	4.23	3.89	1.38	1.7	2.13	1.67	1.82	2.73	1.68	2.55	1.07	2.21
Experiment 4	2.5	2.13	1.65	1.76	1.78	2.43	2.13	2.29	2	7	9.33	10.67	8	8.25	5.67	6.4	6.6	5.6	7.5	4.57	1.52	2.75	2.8	3	2.33	2.08	1.65	1.24	2.56	1.4
	Comparison of the mean group size before (0-21 h) and after (22-33 h and 37-77h) treatment
											Kruskal-Wallis test followed by Dunn's multiple comparisons test
	0-21 h	22-33 h	37-77 h
	2.06	1.94	4.63			Table Analyzed	Data 24 - Comparison of the mean group size before (0-21 h) and after (22-33 h and 37-77h) treatment							Number of families	1
	1.04	1.87	4.14											Number of comparisons per family	3
	3.18	2	3.89			Kruskal-Wallis test								Alpha	0.05
	2.5	2.29	4.57			P value	< 0,0001
	2.92	3.27	2.53			Exact or approximate P value?	Approximate							Dunn's multiple comparisons test	Mean rank diff,	Significant?	Summary	Adjusted P Value
	1.4	1.93	2.6			P value summary	****
	3.17	3	1.38			Do the medians vary signif. (P < 0.05)	Yes							22-33 vs. 0-21	50.24	Yes	****	< 0,0001
	2.13	2	1.52			Number of groups	3							37-77 vs. 0-21	2.321	No	ns	> 0,9999
	2.83	8.25	2.69			Kruskal-Wallis statistic	56.82							37-77 vs. 22-33	-47.92	Yes	****	< 0,0001
	1.6	6.75	3.7
	3	5.67	1.7			Data summary
	1.65	7	2.75			Number of treatments (columns)	3							Test details	Mean rank 1	Mean rank 2	Mean rank diff,	n1	n2
	2	7	1.68			Number of values (total)	120
	1.69	9	1.63											22-33 vs. 0-21	89.79	39.55	50.24	48	28
	4.75	5.14	2.13											37-77 vs. 0-21	41.88	39.55	2.321	44	28
	1.76	9.33	2.8											37-77 vs. 22-33	41.88	89.79	-47.92	44	48
	2.13	7.4	2.14
	1.4	9.67	1.8
	2.75	7	1.67
	1.78	10.67	3
	2.33	5.83	2.43
	2	7	1.56
	1.67	4.25	1.82
	2.43	8	2.33
	2.69	6.33	2.58
	1.69	7	1.63
	2.36	5.83	2.73
	2.13	8.25	2.08
		5.43	2.54
		7	1.93
		3.89	1.68
		5.67	1.65
		3.27	3
		6.76	2.4
		5.67	2.55
		6.4	1.24
		4.88	3.11
		7.25	2.3
		5.83	1.07
		6.6	2.56
		5.88	2.43
		6.25	1.87
		6.83	2.21
		5.6	1.4
		6.8
		6.5
		4.23
		7.5
