# Supplementary material for: Long-term study of behaviors of two cohabiting sea urchin species, Mesocentrotus nudus and Strongylocentrotus intermedius, under conditions of high food quantity and predation risk in situ
Source: PeerJ. 2019 Nov 22;7:e8087. doi: 10.7717/peerj.8087 (PMC6876488; doi:10.7717/peerj.8087)
Supplement: Supplemental Information 15 — The data are presented as the numbers of sea urchins on the feeder and their percentages from the average number calculated as the mean of sea urchins which were present on the feeder during 21 h before the beginning of the treatment (indicated by red color). [file peerj-07-8087-s015.xlsx]

## Sheet: Лист1
Experiment No.	Mean number for 0-21 h	0 h		4 h		8 h		12 h		16 h		20 h		21 h		22 h		23 h		24 h		25 h		26 h		27 h		28 h		29 h		30 h		31 h		32 h		33 h		37 h		41 h		45 h		49 h		53 h
		Number	%	Number	%	Number	%	Number	%	Number	%	Number	%	Number	%	Number	%	Number	%	Number	%	Number	%	Number	%	Number	%	Number	%	Number	%	Number	%	Number	%	Number	%	Number	%	Number	%	Number	%	Number	%	Number	%	Number	%
Experiment 1	35	37	106	38	109	34	97	32	91	34	97	35	100	35	100	33	94	34	97	33	94	35	100	37	106	35	100	38	109	38	109	36	103	39	111	39	111	34	97	37	106	38	109	35	100	32	91	30	86
Experiment 2	28.2857	26	92	28	100	32	113	27	96	28	100	30	106	27	96	28	100	27	96	27	96	27	96	29	103	28	100	28	100	28	100	27	96	29	103	29	103	26	92	25	88	26	92	26	92	26	92	27	96
Experiment 3	35.4286	35	100	38	107	36	102	38	107	33	93	35	100	33	93	32	90	36	102	34	96	36	102	35	100	34	97	35	100	35	100	34	96	35	100	35	100	31	88	35	100	36	102	34	96	32	90	30	85
Experiment 4	32.8571	35	107	34	103	33	100	30	91	32	97	34	103	32	97	32	97	32	97	28	85	28	85	32	97	32	97	33	100	34	103	32	97	33	100	33	100	30	91	32	97	35	107	33	100	28	85	27	82
		Linear regression of data on the absolute numbers of S. intermedius after crushing of conspecifics										Linear regression of data on the relative numbers of S. intermedius after crushing of conspecifics
											Best-fit values
	Best-fit values										Slope	-0,2440 ± 0,02907
	Slope	-0,08111 ± 0,01588									Y-intercept when X=0.0	104,9 ± 1,214
	Y-intercept when X=0.0	34,50 ± 0,6631									X-intercept when Y=0.0	430
	X-intercept when Y=0.0	425.4									1/slope	-4.098
	1/slope	-12.33									95% Confidence Intervals
	95% Confidence Intervals										Slope	-0,3016 to -0,1864
	Slope	-0,1126 to -0,04966									Y-intercept when X=0.0	102,5 to 107,3
	Y-intercept when X=0.0	33,19 to 35,82									X-intercept when Y=0.0	354,8 to 551,6
	X-intercept when Y=0.0	316,5 to 671,8									Goodness of Fit
	Goodness of Fit										R square	0.3739
	R square	0.1811				Time (h)					Sy.x	6.401				Time (h)
	Sy.x	3.497									Is slope significantly non-zero?
	Is slope significantly non-zero?			Linear regression of data on the absolute numbers of S. intermedius.							F	70.47		Linear regression of data on the relative numbers (%) of S. intermedius.
	F	26.09		Upside down triangle denotes the moment of treatment.							DFn, DFd	1,000, 118,0		Upside down triangle denotes the moment of treatment.
	DFn, DFd	1,000, 118,0		Data are presented as median and range.							P value	< 0,0001		Data are presented as median and range.
	P value	< 0,0001									Deviation from zero?	Significant
	Deviation from zero?	Significant									Data
	Data										Number of X values	30
	Number of X values	30									Maximum number of Y replicates	4
	Maximum number of Y replicates	4									Total number of values	120
	Total number of values	120									Number of missing values	196
	Number of missing values	196
											Equation	Y = -0,2440*X + 104,9
	Equation	Y = -0,08111*X + 34,50
[truncated: 12 more columns]
