# Supplementary material for: Long-term study of behaviors of two cohabiting sea urchin species, Mesocentrotus nudus and Strongylocentrotus intermedius, under conditions of high food quantity and predation risk in situ
Source: PeerJ. 2019 Nov 22;7:e8087. doi: 10.7717/peerj.8087 (PMC6876488; doi:10.7717/peerj.8087)
Supplement: Supplemental Information 16 — (A) The changes in the dinstances (cm) of 10 S. intermedius individuals from the place where conspecifics were crushed. (B) The changes in the step length (cm) of 10 S. intermedius individuals in response to crushed conspecifics. [file peerj-07-8087-s016.xlsx]

## Sheet: Лист1
(A)																(B)
Time, min	S. int. 1	S. int. 2	S. int. 3	S. int. 4	S. int. 5	S. int. 6	S. int. 7	S. int. 8	S. int. 9	S. int. 10						Time, min	S. int. 1	S. int. 2	S. int. 3	S. int. 4	S. int. 5	S. int. 6	S. int. 7	S. int. 8	S. int. 9	S. int. 10
1	15.5586	21.5488	22.7071	29.1731	25.5105	29.1084	26.2747	28.8503	28.8503	32.7393						1	0.282843	0	0.1	0.2	0.1	0	0	0.310227	0	0
2	15.5669	21.5488	22.7071	29.1731	25.5105	29.1084	26.3069	29.1235	29.1235	32.7393						2	0	0	0	0.360555	0	0	0	0.553754	0	0
3	15.5669	21.5488	22.7071	29.1731	25.6835	29.1084	26.3756	29.1389	29.1389	32.7393						3	0	0	0	0.316228	0	0	0	0	0	0
4	15.5669	21.5488	22.7071	29.1731	25.6835	28.9417	26.3756	28.8345	28.8345	32.7393						4	0	0	0	0.316228	0	0	0	0.079	0	0
5	15.5669	21.5488	22.7071	29.1731	25.6835	28.9417	26.3756	29.0024	29.0024	32.7393						5	0	0	0.141421	0.1	0	0	0	0.430443	0	0
6	15.5166	21.5488	22.7071	29.1731	25.6835	28.9417	26.3756	29.2307	29.2307	32.7393						6	0	0.2	0	0.316228	0	0	0	0.506203	0	0
7	15.5166	21.5488	22.7071	29.2831	25.774	28.9417	26.3727	28.8503	28.8503	32.7688						7	0.282843	0	0	0.141421	0	0.079	0	0	0	0
8	15.5166	21.5488	22.7071	29.3231	25.774	28.9417	26.4444	29.1704	29.1704	32.7688						8	0	0	0	0.316228	0	0.08	0	0.079	0	0
9	15.5166	21.5488	22.7071	29.3845	25.8804	28.9417	26.3756	29.0944	29.0944	32.7688						9	0	0.2	0	0.2	0	0.187832	0	0	0	0.1
10	15.5166	21.5488	22.7071	29.4594	26.035	28.9417	26.2382	29.0944	29.0944	32.7688						10	0	0	0	0.223607	0	0	0	0	0	0
11	15.5166	21.5488	22.7071	29.5012	25.8962	28.9417	26.3433	29.0944	29.0944	32.7688						11	0	0	0	0.2	0.565685	0	0	0.2	0	0
12	15.5166	21.5215	22.7071	29.5012	26.7711	28.9417	26.2382	29.0944	29.0944	32.7688						12	0	0	0	0.412311	0	0	0	0	0	0
13	15.5166	21.4216	22.7071	29.5012	26.8658	28.8888	26.3113	29.1704	29.1704	32.7354						13	0	0	0	0.447214	0.1	0	0	0	0	0
14	15.5166	21.2584	22.7071	29.5012	26.8658	28.8888	26.4119	29.1704	29.1704	32.7354						14	0	0	0	0.1	0	0	0	0.215407	0	0
15	15.5166	21.1859	22.7071	29.5012	26.943	28.8888	26.2061	29.1704	29.1704	32.7354						15	0	0	0	0.223607	0	0.2	0	0	0	0
16	15.5166	21.1859	23.4963	29.5012	26.8749	28.8888	26.3481	29.1704	29.1704	32.7354						16	0	0	0.632456	0.223607	0	0	0	0	0	0
17	15.5166	21.2139	23.8135	29.5012	26.943	28.8888	26.4165	29.1704	29.1704	32.7354						17	0	0	0.1	0.3	0	0	0	0	0	0
18	15.5166	21.0543	23.7149	29.5012	26.943	28.8888	26.2114	29.1704	29.1704	32.7354						18	0	0	0.1	0.2	0	0	0	0	0	0
19	15.5166	21.0543	23.7149	29.5012	26.943	28.8888	26.2797	29.1704	29.1704	32.7354						19	0	0	0	0.2	0.2	0	0	0.717831	0	0
20	15.5166	21.0543	23.7149	29.5012	26.9089	28.8888	26.5169	29.1704	29.1704	32.7354						20	0	0	0	0.316228	0	0	0.4	0.258155	0	0
21	15.5166	21.0543	23.4361	29.5012	26.7711	28.8888	26.485	29.1704	29.1704	32.8025						21	0	0	0.447214	0.1	0	0	0	0.258	0	0
22	15.4414	21.0543	23.316	29.5012	26.7711	28.8888	26.3481	29.1704	29.1704	32.8362						22	0	0	0.583095	0.1	0	0	0	0	0	0
23	15.4414	21.0543	23.316	29.5012	26.7026	28.8888	26.3481	29.1704	29.1704	32.8362						23	0	0	0.360555	0.141421	0	0	0	0	0	0
24	15.4414	21.0543	23.316	29.5012	26.6343	28.8888	26.3481	29.1704	29.1704	32.8362						24	0	0	0.282843	0.509902	0	0	0	0	0	0.316228
25	15.4414	21.0543	23.8135	29.3845	26.6343	28.8888	26.4806	29.1704	29.1704	32.8362						25	0	0	0.67082	0.141421	0	0	0	0	0	0
26	15.4927	21.0543	24.9778	29.5653	26.6343	28.9417	26.6491	29.1704	29.1704	32.8362						26	0	0	0.1	0.282843	0	0	0.3	0.141421	0	0
27	15.4927	21.0543	25.1966	29.5653	26.6343	28.9417	26.5108	29.1704	29.1704	32.8362						27	0	0	0.447214	0.316228	0	0	0	0	0	0
28	15.4927	21.0543	25.413	29.5653	26.5664	28.8815	26.5464	29.3225	29.3225	32.8362						28	0	0	1.96977	0.141421	0	0	0	0.223607	0	0
29	15.4927	20.9532	26.9299	29.5653	26.5664	28.8815	26.5446	29.3225	29.3225	32.8362						29	0	0	0	0.223607	0.316228	0	0	0.223607	0	0
30	15.4927	20.9532	28.9494	29.5653	26.5664	28.8815	26.6831	29.3225	29.3225	32.8362						30	0	0	0.6	0.360555	0	0	0	0	0	0
31	15.4927	21.0254	30.1376	29.587	26.471	28.8815	26.6138	29.3225	29.3225	32.8362						31	0	0	0.509902	0.1	0	0	0	0	0	0
32	15.4927	21.0254	31.6329	29.587	26.471	28.8815	26.7525	29.3225	29.3225	32.8362						32	0	0	0.583095	0.4	0	0	0	0	0	0
33	15.4927	21.0254	33.4744	29.5124	26.471	28.8815	26.8219	29.3225	29.3225	32.946						33	0	0	0.781025	0	0	0	0	0.572087	0	0
34	15.4927	21.0254	34.552	29.5124	26.4622	28.9381	26.5799	29.3225	29.3225	33.1356						34	0.3	0	0.412311	0.1	0	0	0.1	0	0	0
35	15.4927	21.0254	34.6612	29.5124	26.4622	28.9381	26.7183	29.3225	29.3225	32.9375						35	1.40357	0	1.61555	0	0	0	0	0.524672	0	0
36	15.6384	21.0254	34.6839	29.5124	26.4622	28.9381	26.7525	29.3225	29.3225	32.9375						36	1.80278	0	0.948683	0.1	0	0	0	0.1	0	0
37	15.7446	21.0254	34.987	29.5124	26.4622	28.9381	26.6838	29.3068	29.3068	32.9375						37	0.943398	0	0.5	0.223607	0	0	0	0.1	0	0
38	15.7446	21.0254	34.5061	29.5124	26.4622	28.9947	26.5799	29.3068	29.3068	32.9375						38	0.728011	0	0.412311	0.3	0	0	0	0.2	0	0
39	15.6856	21.0254	36.1202	29.416	26.4622	28.9947	26.4774	29.3068	29.3068	32.9375						39	0.728011	0	0.360555	0.223607	0	0	1.83848	0.602967	0	0
40	15.6856	21.0254	36.1202	29.1489	26.4622	28.9947	26.4417	29.2759	29.2759	32.9375						40	3.38378	0	0.7	0.447214	0	0	0.894427	0.905539	0	0
41	15.6856	21.0254	36.0616	28.9996	26.4622	28.9947	26.3037	29.2759	29.2759	32.9375						41	5.14198	0	0.948683	0.223607	0	0	2	0.282843	0	0
42	15.6856	21.0254	36.6295	28.9996	25.9218	28.9947	26.13	29.2759	29.2759	32.9375						42	3.13847	0	0.223607	0.360555	0	0	0.412311	0.412311	0	0
43	15.6856	21.0254	37.417	28.9996	25.9218	28.9947	26.268	29.2759	29.2759	33.0883						43	2.44131	0.806226	0.2	0.1	0	0	0.3	0.640312	0	0
44	15.6319	21.0254	37.417	28.9996	25.75	28.9947	26.4119	29.2759	29.2759	33.0674						44	0	1.80278	1.47648	1.96431	0.823235	1.48661	0.30555	1.52315	0.948683	0.316228
45	15.4684	21.0254	37.8994	28.9996	24.8322	28.9947	26.5535	29.2759	29.2759	33.1085						45	0	0.316228	1.1	0.692417	2.03343	1.0198	0.503353	0.707107	0.360555	1.21655
46	15.4684	21.0254	38.204	28.9996	24.4651	28.9947	26.622	29.2759	29.2759	33.12						46	0	2.1095	6.33877	0.489327	2.63059	0.509902	0.20824	0.1	0.1	0.447214
47	15.4684	21.0254	38.2172	28.9844	24.4651	28.9947	26.5217	29.2759	29.2759	33.12						47	0	2.5318	5.88727	6.0164	2.5318	0.761577	0.611101	0.1	1.72627	0.509902
48	15.4684	21.0254	38.2307	28.9844	24.4651	28.9947	26.4904	28.8989	28.8989	33.12						48	0	0.707107	0.6	4.67364	1.92354	0.447214	0.400511	0.2	1.52971	1.11803
49	15.4684	21.0254	38.2307	28.8943	24.4651	28.9947	26.7013	28.8989	28.8989	33.0605						49	0	0.848528	0.948683	4.87647	1.92354	0.72111	1.10153	1.39284	2.11896	2.88444
50	12.8661	22.2122	40.619	27.4845	24.3846	33.4481	26.6744	27.9885	27.9885	33.6553						50	0	1.31529	1.55563	4.20476	3.37343	0.4	0.709384	0.943398	1.26491	1.58114
51	12.4655	24.1264	40.8266	28.5441	25.0248	33.5114	27.997	28.0142	28.0142	35.1013						51	0.352341	0.1	1.99249	3.49857	1.42127	0	0.808223	0.509902	2.62488	1.11803
52	13.2803	25.9719	41.7842	29.4583	26.4214	34.0005	28.9723	30.2799	30.2799	37.7344						52	0	1.07703	1.52315	3.3121	2.20227	2.05183	1.90464	0.1	1.5	2.05183
53	13.6582	27.3581	41.7842	30.9178	28.98	34.7464	29.9079	31.4504	31.4504	39.4768						53	0	1.58114	0.1	1.92354	1.93132	0.316228	0.806226	0.4	1.23693	2.72947
54	14.239	27.6617	41.7694	32.4483	31.6563	35.3924	30.5865	32.2777	32.2777	41.2843						54	0	1.40357	0.948683	1.36015	0.5	2.33452	0.632456	1.9	1.30384	0.943398
55	14.7491	29.5563	41.7694	34.1251	33.6375	35.9099	32.6679	33.2949	33.2949	43.4244						55	0	1.26491	1.22066	0.424264	0.5	2.91204	0.632456	1.23693	0.447214	0.223607
56	15.186	32.8468	42.4561	34.538	35.6075	36.9017	34.1405	34.1807	34.1807	43.701						56	0	0.141421	0.894427	0.583095	0.316228	2.15407	0.781025	2.43311	0.2	0.1
57	15.7345	35.3762	42.4899	35.0419	36.5987	38.2807	34.9557	35.2362	35.2362	43.701						57	0	1.13137	0.1	0.583095	0.1	1.92354	0.1	1.81108	0.447214	0
58	15.9857	35.898	42.5036	35.8719	37.309	40.2097	35.7713	35.5044	35.5044	43.701						58	0	0.632456	0.72111	0.1	0.824621	2.86356	0.894427	3.245	0.943398	0
59	16.4703	36.1838	42.4422	36.0838	38.111	40.5176	36.2998	35.5996	35.5996	43.4382						59	0	0.1	0.4	0	0.1	1.47648	0.141421	3.67151	0.141421	1
60	16.1313	36.245	41.4619	36.2671	38.815	40.5956	36.8302	35.8601	35.8601	43.4382						60	0	0	1.34164	0	0.67082	1.62788	0.1	3.40147	1.2083	0.3
61	16.3404	36.0465	41.6113	36.2387	39.0452	40.7134	37.421	36.5262	36.5262	43.4382						61	0	0	0.5	0	0.583095	1.90263	2.1095	3.94081	0.67082	0
62	16.5345	36.2567	41.6612	36.2081	39.1661	40.7134	37.421	36.9214	36.9214	43.4382						62	0	1.20416	0.761577	0	2.15407	2.6	1.9105	4.03113	0.7	0
63	16.4866	36.6411	41.6113	36.2081	39.0295	40.7134	37.3624	38.8	38.8	43.3835						63	0	0.4	1.43178	0	0.316228	1.11803	1.78885	3.61248	1.04403	0
64	16.4151	36.6314	41.5116	36.7154	40.076	40.7529	37.3624	39.8004	39.8004	43.3524						64	0	0	0.707107	0	0.538516	0.806226	1.93132	4.54533	1.07703	0
65	16.6198	37.3307	41.5116	37.2348	40.3959	40.7529	37.1287	40.9222	40.9222	43.3524						65	0	0.1	2.64764	0	0.447214	0.412311	1.58114	1.94165	0.1	0
66	16.8431	37.8756	41.5116	37.3158	40.4665	41.071	37.1287	41.1402	41.1402	43.3214						66	0	0.583095	0.921954	0	0.608276	0.509902	0	3.53553	0.412311	0
67	16.9472	38.9634	41.5116	37.9138	40.6786	40.9525	37.1287	41.3455	41.3455	43.3214						67	0	0.1	1.30384	0.1	0.1	1.70294	0	2.06155	0.608276	0
68	16.9203	39.7394	41.5116	38.1511	40.5757	41.1463	37.1287	41.5087	41.5087	43.3214						68	0	0.282843	3.4	1.10454	0.1	1.0198	0.1	2.78568	0.707107	0
69	18.1755	39.6633	41.5116	38.5618	40.5757	40.7803	37.1287	41.8379	41.8379	43.3214						69	0.162619	0.894427	1.99249	0.2	0.806226	0.509902	0.1	1.78885	0.67082	0
70	18.7464	39.8503	41.5116	38.8897	40.402	40.9344	37.0191	42.1968	42.1968	43.3214						70	0.162619	0.1	0.538516	0.1	0	0.141421	0.5	1.0198	0.583095	0
71	19.72	39.9581	41.5116	39.5903	40.402	41.6438	37.0191	42.3484	42.3484	43.3214						71	0	0.412311	0	0	0.5	0.360555	0.316228	0.9	0.316228	0.141421
72	22.3992	39.9672	41.5116	39.2779	40.82	41.8166	37.0191	42.5116	42.5116	43.2905						72	0	0	0	0.608276	0.583095	0.1	0.412311	1.11803	0.1	0
73	23.9916	39.9211	41.4444	38.4313	40.907	42.1015	37.0191	42.5927	42.5927	43.2905						73	0	0	0	0	0.316228	0.3	0.5	1.7	0.223607	0
74	24.255	40.0292	41.2854	37.7631	41.0067	42.5856	37.0191	42.7025	42.7025	43.2905						74	0	0.447214	0	0	0	0.141421	0	3.21403	0.2	0
75	24.3552	40.2343	41.8022	37.9355	40.9298	43.1668	36.6972	42.871	42.871	43.2905						75	0	0.2	0	0	0.5	0.223607	0	3.2573	0.447214	0
76	24.4976	40.4442	41.9401	37.9355	40.9298	43.1939	36.5365	42.9281	42.9281	43.2598						76	0	0	0	0	0.1	0.8544	0.1	2.20227	0.223607	0.3
77	24.5997	40.5051	41.9876	37.9355	40.7908	43.3033	36.5365	43.0579	43.0579	43.2598						77	0	0.806226	0	0	0.223607	0.3	0.2	1.23693	0.223607	3.7108
78	24.5997	40.4944	41.9876	37.9355	40.7908	43.4234	36.4345	43.1879	43.1879	43.2598						78	0	0.412311	0	0	0	0	0.1	4.49222	0.1	1.21655
79	24.5997	40.4892	42.0214	37.7632	41.1036	43.4234	36.4345	43.1879	43.1879	43.2598						79	0	0	0.894427	0	0	0.223607	0	3.37343	0.1	1
80	24.5997	40.3068	41.9478	37.7427	41.3469	43.4234	36.4345	43.1879	43.1879	43.2905						80	0	1.36015	0.583095	0	0	0.1	0.1	1.22066	0.141421	1.48661
81	24.5997	40.3068	41.9206	37.5081	41.66	43.4234	36.4345	43.1879	43.1879	43.2905						81	0	0.565685	0.72111	0	0	0.2	0.223607	0.1	0.1	0.3
82	57.6619	38.3507	22.9234	47.4086	36.5993	44.0406	31.6555	36.2765	46.7838	44.9455						82	0	1.07703	0.223607	0	0.894427	0.1	0.1	0.2	0.1	0
83	57.7447	38.8052	23.8068	47.4086	36.9442	44.4047	31.6555	39.1749	47.083	44.9455						83	0	0.4	0.1	0	0	0.728011	0	0	0	0
84	57.961	38.8404	25.1106	47.4941	37.0142	46.0497	31.6555	40.3757	47.493	44.9455						84	0	2.68328	0.360555	0	0	0.4	0	0	0	0
85	60.6517	38.7247	28.4992	47.0193	36.9442	46.793	31.5826	41.3561	47.0291	44.9455						85	0	1.02956	0	0	0.1	0.509902	0.1	0	0	0
86	61.4065	38.6487	30.4286	47.1197	37.7203	47.1685	31.5142	42.2241	46.4547	44.9455						86	0	1.04403	0.282843	0	0.1	0.141421	0	0	0	0
87	63.7129	38.5563	30.7535	47.0334	37.7203	47.1474	31.1745	42.0982	45.9355	44.9455						87	0.176171	0.223607	0.538516	0	0	0.2	0.1	0	0	0
88	64.9302	38.9642	30.7535	47.0334	38.2157	47.1664	31.4512	41.2016	46.1385	44.8048						88	0	0.141421	0	0	0	0.1	0.1	0	0	0
89	65.0048	38.9642	30.7535	46.5675	38.7807	47.2266	31.1071	40.6273	46.0532	44.8048						89	0	0	0	0	0	0.1	0.1	0	0.1	0
90	65.7146	38.9642	30.7535	46.5675	38.6411	46.9875	30.6094	40.554	46.0343	44.8048						90	0	0	0	0	0	0.141421	0.2	0	0	0
91	66.3391	38.6716	30.7535	46.5675	38.6411	46.9686	30.6094	40.9087	45.8635	44.8048						91	0	1.70294	0	0	0	0.1	0	0	0	0.1
92	66.3391	38.7496	30.7535	46.5675	38.5787	46.871	30.6094	42.191	45.485	44.8048						92	0	1.07703	0.424264	0.223607	0	0.141421	0	0	0	1.07703
93	68.9173	38.7496	30.7535	46.5675	38.651	47.5995	30.6769	44.0718	45.2621	44.5729						93	0	1.40357	0	0.1	0	0	0.728011	0.447214	0.3	1.2
94	69.0082	38.268	30.7535	46.5675	38.5862	47.7856	30.542	44.5679	45.0733	42.4718						94	0	1.34164	0.1	0	0	0	0.223607	0	0	1.772
95	68.6932	37.8621	30.7535	46.5675	38.5862	47.7856	30.6094	44.2864	45.0219	41.7506						95	0	0	2.24722	0.72111	0	0.5	0.1	0	0	2.34307
96	68.6932	37.8621	31.6456	46.5675	38.5862	47.8323	30.6094	44.6574	45.0733	40.7605						96	0	0	0	0.1	0	0.1	0.2	0	0	1.70294
97	68.6932	38.1649	31.9276	46.5675	38.5862	47.7698	30.542	44.3665	44.9361	39.4226						97	0	0	0.1	0	0.447214	0	0.141421	0	0	0.5
98	68.6932	38.3879	32.2574	46.5675	38.5862	47.6451	30.7574	44.2738	45.0219	39.6317						98	0	0.509902	0.282843	0	0.640312	0	0.1	0	0	1.47648
99	68.6932	39.1801	32.0743	46.5675	38.3388	47.583	30.8246	44.0885	44.9361	39.6317						99	0	0.141421	0	0	0	0.141421	0.1	0.1	0	1.14018
100	68.6932	38.8052	32.1219	46.5675	38.3388	46.9935	30.8246	44.0885	44.9361	39.6317						100	0	0.72111	0	0.360555	0	0.1	0.1	0.1	0	0.447214
101	68.6932	36.8855	32.4809	46.5675	38.3388	46.749	30.8246	44.0885	44.9361	39.6317						101	0	0	0	0.141421	0.1	0.1	0	0.1	0	0.1
102	68.6932	37.1024	32.4809	46.5675	38.4132	46.3667	30.8919	44.0885	44.9361	39.6317						102	0	0	0	0.1	0	0.1	0.1	0	0	0.943398
103	68.6932	37.1276	32.5624	46.5675	38.48	46.5067	30.8919	44.0885	44.9361	39.6317						103	0	0	0	0	0	0	0	0.632456	0	0.583095
104	68.6932	36.9811	32.2176	46.5675	38.48	46.6276	30.8246	44.0885	44.9361	39.6317						104	0	0	0	0	0	0	0	0	0	2.64764
105	68.6932	37.0536	32.2176	46.5675	38.48	46.6882	30.7574	44.0885	44.9361	39.6317						105	0	0.8544	0	0	0	0	0	0.1	0	2.5
106	68.6932	37.0536	32.2176	46.5675	38.48	46.7677	30.6903	44.0885	45.0219	39.6317						106	0	0	0	0	0	0	0	0.4	0	3.41321
107	68.6932	37.0536	32.2176	46.5675	38.48	46.749	30.8246	44.0885	45.0219	39.6317						107	0	0.921954	0	0	0	0	0	0	0.1	2.28035
108	68.6932	38.7283	32.2176	46.5675	38.48	46.6697	30.8246	44.0885	45.0219	39.5619						108	1.64443	0.1	0	0	0	0	0	0	0.1	2.502
109	68.6932	39.6112	32.3388	46.4473	38.48	46.6882	30.8246	44.0885	45.0219	39.1635						109	1.49635	0	0	0	0	0.1	0	0	0	2.96142
110	68.6932	40.9995	32.3388	46.3959	38.48	46.6882	31.1545	44.5343	44.8687	38.3585						110	0	1.10454	0	0	0	0.1	0	0	0	2.5318
111	68.875	41.8561	32.2506	46.3959	38.48	46.6882	31.079	44.5343	44.8687	37.6418						111	0	0.412311	0	0	0	0	0	0	0	3.21403
112	68.875	41.8561	33.7683	45.7454	38.48	46.555	31.007	44.5343	44.8687	37.7466						112	0	0.538516	0	0	0	0	0	0	0	1.45602
113	68.875	41.8561	33.7683	45.7963	38.48	46.6166	30.8635	44.5343	44.8687	38.2029						113	0	0	0.3	0	0	0	0	0	0	2.12603
114	68.875	41.8561	33.7257	45.7963	38.6458	46.6166	30.862	44.5343	44.8687	38.24						114	0	0	0	0	0	0	0	0	0	0.806226
115	68.875	42.3183	33.8231	45.7963	38.7617	46.6166	30.7908	44.5343	44.8687	38.9873						115	0	0	0	0	0	0	0	0	0	0.223607
116	68.875	42.439	33.8231	45.7963	38.7617	46.6339	30.7197	44.4417	44.8687	39.1529						116	0	0	0	0	0	0	0	0	0	0.1
117	68.875	43.1171	33.8231	45.4363	38.7617	46.7128	30.6489	44.5343	44.8687	39.1388						117	0	0	0	0	0	0	0	0	0	0.905539
118	68.875	43.1171	33.8231	45.2993	38.8379	46.6516	30.6489	44.4417	44.8687	39.0919						118	0	0	0	0	0.223607	0	0	0.2	0	0.707107
119	68.875	43.1171	33.8231	45.3502	38.8379	46.5905	30.5781	44.4417	44.8687	39.5732						119	0	0	0	0	0	0	0	0.1	0	1.74929
120	68.875	43.1171	33.8231	45.3502	38.8379	46.5905	30.5781	44.9235	44.8687	39.6205						120	0	0	0	0	0	0	0	0	0	3.41321
121	68.875	43.1171	33.8231	45.3502	38.8379	46.5905	30.5781	44.9235	44.8687	39.019						121	0	0	0	0	0.141421	0	0	0.1	0	2.41661
122	68.875	43.0272	33.8231	45.3502	38.8379	46.5905	30.5781	44.8306	44.8687	39.7286						122	0	0.1	0	0	0.1	0.2	0	0.2	0	1.34164
123	68.875	43.0272	33.8231	45.3502	38.8379	46.5905	30.5781	45.2024	44.8687	40.6432						123	0	0	0	0	0.1	0	0.2	0.781025	0	0.67082
124	68.875	43.9483	33.8231	45.3502	38.8379	46.5905	30.5781	45.2024	44.7826	41.6201						124	0	0	0	0	0.141421	0	0.141421	0.282843	0	2.98329
125	68.875	43.8517	33.8231	45.3502	38.8379	46.5905	30.5781	45.2024	44.8687	41.3118						125	0	0	0	0	0	0	0.141421	0.1	0	2.64008
126	68.875	43.8517	33.8231	45.3502	38.8379	46.5295	30.5781	45.2024	44.8687	40.4277						126	0	0	0	0	0	0	0	0.1	0	1
127	68.875	44.8895	33.8231	45.3502	38.8379	46.4686	30.5781	45.2024	44.8687	39.9441						127	0	0	0	0	0.141421	0	0	0.1	0	0
128	68.875	45.3018	33.8231	45.3502	38.8379	46.4686	30.5781	45.2024	44.8687	40.3632						128	0	0	0	0	0	0	0	0.1	0	0
129	68.9593	44.9845	33.8231	45.3502	38.8379	46.4686	30.5781	45.2024	44.8687	41.7908						129	0	0	0	0	0	0	0	0	0	0.2
130	68.875	44.9845	34.096	45.3502	38.8379	46.4686	30.5781	45.2024	44.8687	43.3451						130	0	0	0	0	0	0	0	0.223607	0	0
131	68.875	44.9845	34.096	45.3502	38.8379	46.4686	30.5781	45.2024	44.8687	44.1513						131	0	0	0	0	0.282843	0	0	0	0	0
132	68.875	44.9845	34.096	45.3502	38.8379	46.4686	30.5781	45.2024	44.8687	44.3617						132	0.176171	0	0	0	0.1	0	0	0.1	0	0
133	68.875	44.9845	34.096	45.3502	38.8379	46.4686	30.5781	45.2024	44.8687	44.3738						133	0.162619	0	0	0	0.1	0	0	0.2	0	0.2
134	68.875	44.9845	34.096	45.3502	38.8379	46.4686	30.5781	45.2024	44.8687	44.5913						134	0.162619	0	0	0	0.1	0.1	0	0.1	0	0
135	68.875	44.9845	34.096	45.3502	38.7507	46.4686	30.5781	45.0164	44.8687	45.2706						135	0	0	0	0	0	0.1	0	0	0	0.316228
136	68.875	44.9845	34.096	45.3502	38.7507	46.4686	30.5781	45.1094	44.8687	46.3875						136	0	0	0	0	0	0.141421	0	0	0	0
137	68.875	44.9845	34.096	45.3502	38.7507	46.4686	30.5781	45.1094	44.8687	46.78						137	0	0.2	0	0	0	0	0	0.2	0	0
138	68.875	44.9845	34.096	45.3502	38.7403	46.4686	30.5781	45.2024	44.8687	46.3914						138	0	0	0	0	0.1	0.141421	0	0	0.447214	0
139	68.875	44.8875	34.096	45.3502	38.6749	46.5905	30.5781	45.0164	44.8687	46.1795						139	0	0	0	0	0.1	0	0	0	0	0
140	68.875	44.8875	34.096	45.3502	38.5992	46.5905	30.4369	45.704	44.8687	46.0879						140	0	0	0	0	0	0.1	0	0.1	0	0
141	68.875	44.8875	34.096	45.3502	38.5892	46.5905	30.4377	45.4436	44.8687	46.4716						141	0	0	0	0.1	0	0	0.1	0	0	0
142	68.875	44.8875	34.096	45.3502	38.5892	46.5905	30.5792	45.4062	44.8687	46.462						142	0	0	0	0.5	0	0	0.1	0.141421	0	0
143	68.875	44.8875	34.096	45.3502	38.5892	46.5905	30.5792	45.3134	44.8687	46.9097						143	0	0.1	0	0	0	0	0.1	0.1	0	0.223607
144	68.875	44.8875	34.096	45.3502	38.5798	46.5905	30.5792	45.4062	44.8687	46.9097						144	0	0.223607	0	0	0	0	0	0.1	0	0
145	68.875	44.8875	34.096	45.3502	38.5798	46.5905	30.5792	45.4436	44.8687	46.9097						145	0	0	0	0.1	0	0	0	0	0	0
146	68.875	44.8875	34.096	45.3502	38.5798	46.5905	30.5792	45.4436	44.8687	47.0013						146	0.176171	0.2	0	0.1	0	0	0	0	0	0
147	68.7839	44.8875	34.096	45.3502	38.5798	46.5905	30.5792	45.6114	44.8687	47.0013						147	0	0.2	0	0.223607	0	0	0	0.1	0	0
148	68.7839	44.8875	34.096	45.3502	38.5623	46.5905	30.5792	45.6114	44.8687	47.0013						148	0	0.223607	0	0	0	0	0	0	0	0
149	68.7839	44.8875	34.096	45.3502	38.6289	46.5905	30.5792	45.704	44.8687	47.0013						149	0	0.1	0	0.1	0	0	0.1	0	0	0
150	68.7839	44.8875	34.096	45.3502	38.5544	46.5905	30.5792	45.5188	44.8687	46.8238						150	0.358891	0	0	0	0	0	0	0	0	0
151	68.7839	44.8875	34.096	45.3502	38.6213	46.6516	30.5792	45.6114	44.8687	46.8238						151	0.176171	0	0	0	0	0.141421	0.1	0	0	0
152	68.7839	44.8875	34.096	45.3502	38.6213	46.7128	30.5792	45.6114	44.8687	46.8745						152	0.176171	0.2	0	0	0.223607	0	0.141421	0	0	0
153	68.7839	44.8875	34.096	45.3502	38.6213	46.6954	30.5792	45.6114	44.8687	46.8745						153	0	0.1	0	0.2	0	0	0	0	0	0
154	68.7839	44.6935	34.096	45.3502	38.6213	46.6954	30.5792	45.4262	44.8687	46.8745						154	0	0.1	0	0	0	0	0	0	0	0
155	68.7839	44.6935	34.096	45.3502	38.547	46.6783	30.5792	45.4262	45.3148	46.8745						155	0	0	0	0	0	0	0	0	0	0
156	68.7839	44.6935	34.096	45.3502	38.48	46.6783	30.5792	45.4262	45.3148	46.8745						156	0	0	0	0.1	0	0	0	0	0	0
157	68.7839	44.6935	34.096	45.3502	38.48	46.6166	30.5792	45.3336	45.3148	46.8745						157	0	0	0	0	0.583095	0	0	0	0	0
158	68.7839	44.6935	34.096	45.2993	38.48	46.6166	30.5091	45.3336	45.3148	46.8745						158	0	0	0	0	0	0.1	0	0	0	0
159	68.7839	44.6935	34.096	44.8379	38.48	46.6166	30.5792	45.4641	45.3148	46.8745						159	0	0	0.447214	0	0.2	0	0	0	0	0
160	68.7839	44.7905	34.096	44.8379	38.48	46.6166	30.5091	45.5566	45.3148	47.0565						160	0.176171	0	0.282843	0.2	0.141421	0	0	0	0	0
161	68.7839	44.7427	34.096	44.8379	38.48	46.6166	30.5091	45.4641	45.3148	47.0565						161	0	0	0	0	0	0	0	0	0	0
162	68.7839	44.7427	34.096	44.8885	38.48	46.6166	30.5091	45.4641	45.3148	47.0565						162	0	0	0	0.1	0	0	0	0	0.1	0
163	68.7839	44.549	34.096	44.8379	38.48	46.6166	30.5091	45.4641	45.3148	47.0565						163	0	0	0	0	0.141421	0	0	0	0	0
164	68.7839	44.3554	34.096	44.8238	38.48	46.6166	30.5091	45.5566	45.3148	47.0565						164	0	0	0	0.223607	0	0	0	0	0.141421	0
165	68.7839	44.2088	34.096	44.8238	38.48	46.6166	30.5091	45.5566	45.3148	47.0565						165	0.235701	0	0	0	0	0	0	0	0	0
166	68.7839	44.1119	34.096	44.9104	38.48	46.6166	30.5792	45.5566	45.3148	47.0565						166	0.162619	0	0	0.141421	0	0	0	0	0	0
167	68.7839	44.1119	34.096	44.9104	38.48	46.6166	30.5792	45.5566	45.3148	47.0565						167	0	0	0	0.141421	0.282843	0.141421	0	0	0	0.583095
168	67.1395	44.1119	34.096	44.9104	38.48	46.757	30.5091	45.5566	45.3148	47.0565						168	0	0	0	0.223607	0	0.1	0	0	0	0.316228
169	65.6709	44.1617	34.096	44.9104	38.6883	46.757	30.5109	45.5566	45.3148	47.0565						169	0	0	0	0	0	0	0	0	0	0.316228
170	65.6709	44.065	34.096	44.7373	38.6883	46.757	30.5109	45.5566	45.3148	47.0565						170	0	0.1	0	0	0.1	0.1	0	0.4	0	0.141421
171	65.6709	44.1617	34.096	44.7373	38.6883	46.757	30.5109	45.5566	45.3148	47.0565						171	0	0	0	0	0	0	0.8	0	0.141421	0
172	65.6709	44.1617	34.096	44.7373	38.6883	46.757	30.5109	45.5566	45.3148	47.0565						172	0	0.1	0	0	0	0	0.2	0.1	0	0.141421
173	65.8025	44.2933	34.3108	44.3724	38.5612	46.8099	30.6425	45.6882	45.3957	47.1881						173	0.97374	0.2	0	0	0	0	0.141421	0	0.1	0
174	65.8025	44.2933	34.3108	44.2358	38.5612	46.8099	30.6425	45.6882	45.3957	47.1881						174	0.51496	0	0	0	0	0	0	0	0	0
175	65.8025	44.2933	34.3108	44.0992	38.2789	46.6695	30.6425	45.6882	45.3957	47.1617						175	0.176171	0	0	0	0	0	0	0.1	0.141421	0
176	65.8025	44.2933	34.3108	43.9129	38.2789	46.5909	30.6425	45.6882	45.3957	47.394						176	0	0.1	0	0	0	0	0	0.1	0	0
177	65.8025	44.2933	34.3108	43.9129	38.2789	46.5909	30.6425	45.6882	45.3957	47.4529						177	0	0.1	0	0	0	0	0.2	0	0.2	0
178	65.8025	44.3186	34.3108	43.9129	38.3539	46.5291	30.6425	45.3184	45.3957	47.5891						178	0.51496	0	0	0	0	0	0.4	0	0.1	0
179	65.8025	44.3186	34.3108	43.9129	38.3539	46.5291	31.2217	45.3184	45.4316	47.5891						179	0	0	0	0	0	0	0.223607	0	0	0
180	65.6709	44.1617	34.096	44.6508	38.6883	46.757	30.5109	45.5566	45.3148	47.0565						180	0.358461	0	0	0	0	0	2.20227	0	0.223607	0
181	65.6709	44.1617	34.096	44.6508	38.5798	46.757	30.5109	45.5566	45.3148	47.0565						181	0	0.806226	0	0	0	0	1.52971	0	0.2	0
182	65.6709	44.1617	34.096	44.6508	38.5798	46.6783	30.5109	45.5566	45.3148	47.0565						182	0	1.06301	0	0	0	0	2.54951	0	0	0
183	65.6709	44.1617	34.0823	44.6508	38.4296	46.6783	30.5109	45.5566	45.3148	47.0565						183	0	0	0	0	0	0	1.52971	0	0	0
184	65.6709	44.1617	34.1792	44.478	38.4212	46.6783	30.5109	45.5566	45.3148	47.0565						184	0	0	0	0	0	0	0.1	0.1	0	0
185	65.6709	44.1617	34.1792	44.478	38.4212	46.6783	30.5109	45.5566	45.3148	47.0565						185	0	1.33417	0	0	0	0	0.3	0	0.1	0
186	65.6709	44.1617	34.1792	44.4276	38.4212	46.6783	30.5109	45.5566	45.401	47.0565						186	0	0.1	0	0	0	0	0.3	0	0	0
187	65.6709	44.1617	34.1792	44.4276	38.4296	46.6783	30.5109	45.5566	45.401	47.0565						187	0	0.1	0	0	0	0	0.1	0	0	0
188	65.6709	44.1617	34.1792	44.2408	38.4296	46.6783	30.5109	45.5566	45.2642	47.0565						188	0	1.44222	0	0	0	0	0.1	0	0	0
189	65.6709	44.1617	34.1792	44.2408	38.4296	46.6783	30.5109	45.5566	45.2642	47.0565						189	0	0.360555	0.5	0	0	0	0.1	0	0.1	0
190	65.6709	44.1617	34.1792	44.1042	38.4296	46.6783	30.5109	45.5566	45.2642	47.0565						190	0	0.360555	0.141421	0	0	0	0.1	0	0	0
191	65.6709	44.1617	34.1792	43.9676	38.1473	46.5379	30.5109	45.5566	45.2642	47.0301						191	0	1.11803	0.1	0	0	0	0.2	0	0	0.2
192	65.6709	44.1617	34.1792	43.7813	38.1473	46.4593	30.5109	45.5566	45.2642	47.2624						192	0	0	0.1	0	0	0	0.223607	0	0	0.1
193	65.6709	44.1617	34.1792	43.7813	38.1473	46.4593	30.5109	45.5566	45.2642	47.3213						193	0	0.447214	0.223607	0	0.1	0.1	0.1	0	0	0.141421
194	65.6709	44.187	34.1792	43.7813	38.2224	46.3975	30.5109	45.1869	45.2642	47.4575						194	0	0.3	0	0	0	0	0.223607	0	0	0.1
195	65.6709	44.187	34.1792	43.7813	38.2224	46.3975	31.0902	45.1869	45.3	47.4575						195	0	0.223607	0	0.1	0	0	0.316228	0	0	0
196	65.6709	44.0903	34.1792	43.7813	38.2224	46.3975	31.2365	45.0945	45.3	47.4197						196	0	0	0	0	0	0	0.141421	0	0	0
197	65.6709	44.1415	34.1792	43.7813	38.2224	46.3975	31.3778	45.0945	45.3865	47.4197						197	0	0.282843	0	0	0	0	0.640312	0	0	0
198	65.6709	44.1415	34.1792	43.7813	38.2224	46.3975	31.3778	45.0945	45.3865	47.4197						198	0	0.447214	0	0	0	0.1	0.223607	0	0.1	0
199	65.7626	44.1415	34.1792	43.7813	38.2224	46.3975	31.3778	45.1869	45.4229	47.4197						199	0	0.1	0	0	0	0	0.1	0	0.1	0
200	65.8475	44.0449	34.1792	43.7813	38.2224	46.3975	31.3778	45.0945	45.4229	47.4197						200	0	0	0	0	0	0	0	0.1	0	0
201	65.7626	44.1415	34.1792	43.7813	38.2224	46.3975	31.5247	45.0945	45.2498	47.4197						201	0	0	0	0	0	0	0	1.31529	0	0
202	65.7626	44.1415	34.1792	43.7813	38.2224	46.3975	31.7969	45.0945	45.1633	47.4197						202	0	0	0	0	0	0	0	0	0	0
203	65.7626	44.1415	34.1792	43.7813	38.2224	46.3975	31.5826	45.0945	45.1633	47.4197						203	0	0.583095	0	0	0	0	0	0.2	0	0
204	65.7626	44.1415	34.1792	43.7813	38.2224	46.3975	33.1986	45.0945	45.0411	47.4197						204	0	0.4	0	0	0	0	0	0	0	0
205	65.7626	43.9428	34.1792	43.7813	38.2224	46.3975	34.0904	45.0945	45.2136	47.4197						205	0	0	0	0	0.316228	0	0	0	0	0.1
206	65.7626	44.4058	34.1792	43.7813	38.2224	46.3975	36.5431	45.0945	45.2136	47.4197						206	0	0.1	0	0	0.223607	0.141421	0	0	0.1	0.1
207	65.7626	44.4058	34.1792	43.7813	38.2224	46.3975	37.5011	45.0945	45.2136	47.4197						207	0	0	0	0	0	0	0.223607	0.223607	0.2	0
208	65.7626	44.4058	34.1792	43.7813	38.2224	46.3975	37.5641	45.1869	45.2136	47.4197						208	0	0	0	0	0	0	0.948683	0.3	0.1	0.1
209	65.7626	45.7394	34.1792	43.7813	38.2224	46.3975	37.3318	45.1869	45.3	47.4197						209	0	0	0	0	0	0	0.1	0	0.1	0
210	65.7626	45.8361	34.1792	43.7813	38.2224	46.3975	37.5641	45.1869	45.3	47.4197						210	0	1.72627	0	0	0	0	0	0.412311	0.1	0
211	65.7626	45.8615	34.1792	43.7813	38.2224	46.3975	37.4866	45.1869	45.3	47.4197						211	0	0	0	0	0	0	0	0	0	0
212	65.7626	47.2282	34.1792	43.7813	38.2224	46.3975	37.4092	45.1869	45.3	47.4197						212	0	0.2	0	0	0	0	0.2	0	0.223607	0
213	65.6709	47.5011	34.4198	43.7813	38.2224	46.3975	37.4866	45.1869	45.2136	47.4197						213	0	0	0	0.1	0	0	0	0.824621	0	0
214	65.6709	47.844	34.3694	43.7813	38.2224	46.3975	37.4092	45.1869	45.2136	47.4197						214	0	0	0	0	0	0	0.1	0.728011	0	0
215	65.6709	48.9571	34.4606	43.7813	38.2224	46.3975	37.2546	45.1869	45.2136	47.5938						215	0	0	0	0	0.2	0	0.141421	0.1	0	0.2
216	65.6709	48.9571	34.3694	43.7813	38.2224	46.3975	37.3459	45.1869	45.2136	47.6809						216	0	0	0.447214	0	0	0	0.141421	0	0	0.1
217	65.496	49.3963	34.5429	43.7813	38.2885	46.3358	37.4234	45.1869	45.2136	47.7191						217	0	0	0	0.509902	0	0	0	0.1	0	0
218	65.4039	49.4785	34.5429	43.7813	38.2885	46.3358	37.2052	45.1869	45.2136	47.6704						218	0	0	0	0	0	0	0.3	0.1	0	0
219	65.496	49.4383	34.5429	43.6945	38.2885	46.3358	36.9386	45.1869	45.2136	47.6704						219	0	0	0	0	0	0	0	0.1	0	0
220	65.496	49.4383	34.5429	43.6945	38.2885	46.3358	37.0792	45.1869	45.2136	47.6704						220	0	0	0	0	0	0	0.3	0.1	0	0.1
221	65.496	49.3032	34.5429	43.6945	38.2885	46.3358	37.0877	45.1869	45.2136	47.6704						221	0.602197	0	0	0	0	0	0.1	0.1	0	0
222	65.496	48.9781	34.5429	43.6945	38.2885	46.3975	36.8828	45.1869	45.3	47.6704						222	0.235373	1.61245	0.1	0	0	0	0.3	0	0	0
223	65.496	48.8824	34.5429	43.6945	38.2885	46.3975	36.8189	45.1869	45.2136	47.6704						223	0	0.984886	0.1	0	0	0	0.223607	0	0	0
224	65.496	48.8824	34.5429	43.6945	38.2885	46.3975	36.8189	45.1487	45.2136	47.6704						224	0	0.3	0	0	0	0	0	0	0	0
225	65.496	48.8824	34.5429	43.6945	38.2885	46.3975	36.8189	46.4279	45.2136	47.6704						225	0	0.1	0	0	0.282843	0	0	0.1	0	0
226	65.496	48.8824	34.5429	43.6945	38.2885	46.3975	36.8189	46.4279	45.2136	47.6704						226	0	0.2	0	0	0	0	0	0.2	0	0
227	65.4039	49.3171	34.5429	43.6945	38.2885	46.3975	36.8189	46.6133	45.2136	47.6704						227	0.338789	0	0	0	0.1	0	0	0.2	0	0.1
228	65.4039	49.4386	34.5429	43.6945	38.2885	46.3975	36.8189	46.6133	45.2136	47.6704						228	0.162619	0.412311	0	0	0	0	0	0.1	0	0
229	65.4039	49.4386	34.5429	43.6945	38.4481	46.3975	36.8189	46.6133	45.2136	47.583						229	0.162619	0.412311	0	0	0	0.141421	0	0.3	0	0
230	65.4039	49.4695	34.5429	43.6945	38.5046	46.2571	36.8189	46.6133	45.1633	47.6704						230	0	0.447214	0	0	0	0	0	0.2	0	0
231	65.4039	49.4695	34.5429	43.6945	38.5046	46.2571	37.0237	46.3905	45.0631	47.6704						231	0.176171	0.1	0	0	0	0	0	0.1	0	0
232	65.6294	49.4695	34.5429	43.6945	38.5046	46.2571	37.3797	46.2794	44.9765	47.583						232	0	0	0	0	0	0	0.316228	0.1	0.4	0.1
233	65.7146	49.4695	34.5429	43.6945	38.5046	46.2571	37.3045	46.2794	44.8899	47.583						233	0	0	0.1	0	0.1	0	0	0	0.1	0
234	65.7146	50.3036	34.5429	43.6945	38.5046	46.2571	37.3045	45.8707	44.9765	47.583						234	0	0	0	0	0	0	0	0	0	0
235	65.7146	50.3036	34.5429	43.6945	38.5046	46.2571	37.3045	45.8707	44.9765	47.583						235	0	0.608276	0	0	0	0	0	0	0	0
236	65.7146	50.1154	34.5429	43.6945	38.5046	46.2571	37.4367	45.8707	45.1633	47.583						236	0	0	0	0	0	0	0	0	0.1	0.316228
237	65.7146	50.1154	34.5429	43.7444	38.5046	46.2571	37.4367	46.6882	45.1633	47.583						237	0	0	0	0	0	0	0	0	0.1	0
238	65.7146	50.1154	34.5429	43.7444	38.5046	46.2571	37.3618	45.9637	45.1633	47.583						238	0	0	0	0	0	0	0	0	0	0
239	65.7146	50.1154	34.5429	43.7444	38.3548	46.2571	37.503	46.0567	45.1633	47.4085						239	0	0.1	0	0.3	0	0	0	0	0	0
240	66.5627	50.1154	34.5294	43.7444	38.3548	46.2571	37.6442	46.0567	45.1633	47.3213						240	0	0	0	0	0	0	0	0	0.1	0
241	66.8373	50.1154	34.5294	43.2615	38.3548	46.2571	37.6442	46.1497	45.1633	47.3213						241	0	0.3	0	0	0	0	0.316228	0	0.282843	0
242	66.9319	50.1154	34.5294	43.2615	38.3548	46.2571	37.8441	46.0567	45.1633	47.3213						242	0.338789	0.316228	0	0	0	0	0.1	0	0.1	0
243	66.9319	50.1154	34.5294	43.2615	38.3548	46.2571	37.8441	46.1497	45.1633	47.3213						243	0	0.3	0	0	0	0	0	0	0	0
244	66.9319	50.1154	34.5294	43.2615	38.3548	46.2571	38.0453	46.0567	45.1633	47.4085						244	0.338789	0	0	0	0	0	0	0.3	0	0
245	66.6564	50.1154	34.5294	43.2615	38.3548	46.2571	38.1193	46.1497	45.1633	47.4085						245	0.156091	0	0	0	0	0	0	0.2	0.2	0
246	66.6564	49.8631	34.5721	43.2615	38.3548	46.2571	37.9185	46.1497	45.1633	47.4085						246	0	0	0.316228	0	0.1	0	0	0	0	0.1
247	66.2983	49.8331	34.4817	43.2615	38.3548	46.2571	38.1343	46.1497	45.1633	47.4085						247	0	0	0.447214	0	0.2	0	0	0	0	0.282843
248	66.2983	50.1099	34.4817	43.2615	38.3548	46.2571	38.1343	46.1497	45.1633	47.4085						248	0	0	0.223607	0	0	0	0	0	0	0.282843
249	66.2983	50.1485	34.4817	43.2615	38.0724	46.2571	38.1343	46.2428	45.1633	47.4085						249	0	0	0	0	0.1	0	0	0.4	0	0
250	66.2983	50.2262	34.4817	43.2615	38.0724	46.2571	38.1343	46.0567	45.1633	47.4085						250	0.358461	0.538516	0	0	0	0	0	0.5	0	0
251	66.2983	50.2262	34.4817	43.2615	37.9976	46.2571	38.1343	46.2428	45.1633	47.4575						251	0	0.1	0	0	0	0	0	0.1	0.2	0
252	66.2983	50.4754	34.4817	43.2615	37.9976	46.2571	38.1343	46.1497	45.1633	47.4575						252	0	0.1	0	0	0	0	0	0.1	0	0
253	66.2983	50.4104	34.4817	43.2615	37.9976	46.3975	38.1343	45.8707	45.1633	47.4575						253	0	0	0	0	0	0	0.316228	1.71172	0	0
254	66.2983	50.4411	34.4817	43.2615	37.9976	46.3975	38.1343	45.6848	45.1633	47.4575						254	0	0	0	0	0	0.223607	0	0.1	0.1	0
255	66.2983	50.3486	34.4817	43.2615	37.9976	46.3975	38.1343	45.5919	45.1633	47.4575						255	0	0	0	0	0	0	0	1.83576	0	0
256	66.2983	50.3486	34.4817	43.2615	37.9976	46.3975	38.2606	45.6848	45.5095	47.3704						256	0	0	0	0	0	0	0	0.282843	0	0
257	66.2983	50.3486	34.5721	43.2615	38.0641	46.3975	38.2606	45.6848	45.4229	47.3704						257	0	0	0.1	0	0	0	0	1.14018	0	0
258	66.2983	50.3486	34.5721	43.2615	38.0641	46.3975	38.2606	45.6848	45.4229	47.3704						258	0	0	0	0	0	0	0	0.781025	0	0
259	66.2983	50.9416	34.5721	43.2615	38.0641	46.3975	38.2606	45.6848	45.4229	47.3704						259	0	0	0	0	0	0	0	0.632456	0	0
260	66.2983	50.9416	34.5721	43.2615	38.0641	46.3975	38.2606	45.6848	45.3363	47.1363						260	0	0	0	0	0	0	0	0.282843	0	0
261	66.2983	50.9416	34.5721	43.2615	38.0641	46.3975	38.2606	45.6848	45.4229	47.1363						261	0	0	0	0	0	0	0	0	0.2	0
262	66.2983	50.9416	34.5721	43.2615	38.0641	46.3975	38.2606	45.6848	45.4229	47.1363						262	0	0	0	0	0	0.223607	0	0	0.806226	0
263	66.2983	51.0342	34.5721	43.1115	38.0641	46.3975	38.2606	45.6848	45.4229	47.1363						263	0	0	0	0	0	0	0	0.1	0	0
264	66.2983	51.0342	34.5721	43.1115	38.0641	46.3975	38.2606	45.6848	45.3363	47.1363						264	0	0	0	0	0	0	0	0	0	0
265	66.2983	51.312	34.5721	43.1115	38.0641	46.3975	38.5365	45.6848	45.2642	47.1363						265	0	0	0	0	0.2	0	0	0	0	0
266	66.2983	51.6276	34.5721	43.1115	38.0641	46.3975	38.4627	45.6848	45.3504	47.1363						266	0	0	0	0	0	0	0	0.360555	0	0
267	66.2983	51.9057	34.5721	43.1115	38.0641	46.3975	38.4627	45.6848	45.3504	47.1363						267	0	0	0	0.4	0	0	0	0	0	0
268	66.2983	51.9057	34.5721	43.1115	38.0641	46.3975	38.4627	45.4062	45.3504	47.1363						268	0	0	0	0	0	0	0	0.316228	0.223607	0
269	66.2983	51.9057	34.5721	43.1115	38.0641	46.3975	38.4627	45.5919	45.2498	47.1363						269	0	0	0	0	0	0	0	0.1	0.1	0
270	66.2983	51.9057	34.2582	43.1115	37.9896	46.3975	38.4627	45.5919	45.2498	47.2236						270	0	0	0	0	0.1	0.141421	0.4	0.1	0	0
271	66.2983	51.9057	34.5354	43.1115	38.1233	46.3975	38.4627	45.5919	45.2498	47.1471						271	0	0	0	0	0.1	0	0	0	0	0
272	66.2983	51.9057	34.361	43.1115	38.1233	46.3975	38.4627	45.5919	45.2498	47.4197						272	0	0	0	0	0	0	0	0	0.2	0
273	66.2983	51.9057	34.361	43.1115	38.0564	46.3975	38.4627	45.9637	45.2498	47.4197						273	0	0	0	0	0	0	0	0.1	0.223607	0
274	66.2983	51.9072	34.361	43.1115	38.0564	46.3975	38.4627	45.4991	45.2498	47.4197						274	0	0.223607	0	0	0	0.1	0.282843	0.141421	0.608276	0
275	66.2983	51.814	34.361	43.1115	38.0564	46.3975	38.4627	45.5919	45.1498	47.4197						275	0	0	0	0.1	0.141421	0.1	0.360555	0	1.00499	0
276	66.2983	51.7776	34.361	43.1115	38.0564	46.3975	38.4627	45.4991	45.1498	47.4197						276	0	0	0	0	0	0	0	0	0.316228	0
277	66.2983	51.7776	34.361	43.1115	38.0564	46.3975	38.3347	47.1538	45.1498	47.4197						277	0	0	0	0.1	0.1	0	0	0.1	0.5	0
278	66.2983	51.7776	34.361	43.1115	38.0564	46.1785	38.3347	47.2471	45.1	47.4197						278	0	0	0	0	0.447214	0	0	0	0.412311	0
279	66.2983	51.7776	34.361	43.1115	38.0564	46.1785	38.3347	48.4336	45.1	47.4197						279	0	0	0	0.1	0	0	0	0	1.47648	0
280	66.2983	51.7776	34.361	43.1115	38.0564	46.1785	38.3347	48.5559	45.1	47.4197						280	0	0	0	0.72111	0	0	0	0	0.424264	0
281	66.2983	51.7776	34.2701	43.1115	38.0564	46.1785	38.3347	48.9321	45.1	47.4197						281	0	0	0	0.141421	0.1	0	0	0	1.34536	0
282	66.2983	51.7776	34.2701	43.1115	38.0564	46.1785	38.3347	49.2279	45.1	47.4197						282	0	0	0	0	0.1	0.141421	0	0.5	0.72111	0
283	66.2983	51.7776	34.2701	43.1115	38.0564	46.1785	38.3347	49.2464	45.1	47.4197						283	0	0	0	0.1	0.2	0	0	0	0.640312	0
284	66.2983	51.7776	34.2701	43.1115	38.0564	46.1785	38.3347	49.3824	45.1	47.4197						284	0	0	0	0.1	0	0	0	0	0.538516	0
285	66.2983	51.7776	34.2701	43.1115	38.0564	46.1785	38.3347	49.3824	44.9266	47.4197						285	0	0	0	0.1	0	0	0	0.1	0.1	0
286	66.2983	51.7776	34.2701	43.1115	38.0564	45.9595	38.3347	49.3824	45.4167	47.4197						286	0	0	0	0	0	0	0	0.1	0	0
287	66.2983	51.7776	34.2701	43.1115	38.0564	45.9595	38.3347	49.2864	45.4167	47.4197						287	0	0	0.282843	0	0.316228	0	0	0.2	0	0
288	66.8373	51.7776	34.2701	43.1115	38.0564	45.9595	38.3347	49.2864	45.4167	47.4197						288	0	0	0.141421	0	0.141421	0	0.223607	0	0	0
289	67.0636	51.7776	34.2701	43.1115	38.2053	45.9595	38.3347	49.2864	45.4167	47.4197						289	0	0	0.360555	0	0.1	0	0.316228	0	0	0
290	67.0636	51.7776	34.2701	43.1115	38.2053	45.9595	38.3347	49.0114	45.4167	47.4197						290	0	0	0	0	0.1	0	0.1	0	0.424264	0
291	67.0636	51.7776	34.2701	42.914	38.2053	45.9595	38.3347	49.0114	45.4167	47.4197						291	0	0	0.1	0	0	0.1	0.1	0	0.1	0
292	67.0636	51.7776	34.2701	42.914	38.2053	45.9595	38.3347	49.0266	45.4334	47.4197						292	0	0	0	0	0	0	0.2	0	0.583095	0
293	67.0636	51.7776	34.2701	42.914	38.2053	45.9595	38.3347	49	45.5192	47.4197						293	0	0	0	0	0	0	0	0	0.141421	0
294	67.2461	51.7776	34.2701	42.914	38.28	45.819	38.6325	48.9035	45.5192	47.4197						294	0	0.223607	0	0	0	0.3	0.316228	0	0	0
295	67.1583	51.7776	34.2701	42.914	38.3548	45.819	38.6325	48.9035	45.5192	47.4197						295	0	0	0	0	0	0	0.1	0	0.1	0
296	67.2461	51.7776	34.2701	42.914	38.3548	45.819	38.6325	48.9035	45.4167	47.4197						296	0	0	0	0	0	0.223607	0	0	0	0
297	67.2461	51.7776	34.2701	42.914	38.3548	45.819	38.6325	49	45.1937	47.4197						297	0	0	0	0	0.141421	0	0	0	0	0
298	67.3414	51.6121	34.2701	42.914	38.3548	45.7572	38.6498	48.8771	44.9765	47.4197						298	0	0	0	0	0	0	0.1	0	0	0
299	67.3414	51.6121	34.2701	42.9631	38.3635	45.819	38.6038	48.8771	44.3971	47.4197						299	0	0	0	0	0.282843	0	0	0	0	0
300	67.3414	51.6121	34.2701	42.9631	38.3635	45.819	38.6038	48.8771	44.6118	47.4197						300	0	0	0	0	0	0	0	0.1	0.5	0
301	67.3414	51.6121	34.2701	42.914	38.4386	45.819	38.6038	48.7806	44.6859	47.4197						301	0	0	0	0.1	0.3	0	0	0	0.1	0
302	67.3414	51.6121	34.2701	42.914	38.6097	45.819	38.6038	48.7806	44.9928	47.4197						302	0	0	0.3	0.360555	0	0	0	0.2	0.1	0
303	67.3414	51.6121	34.2701	42.865	38.6097	45.819	38.6038	48.7806	45.0331	47.4197						303	0	0	0	0.1	0	0	0	0.4	0.1	0.1
304	67.3414	51.6121	34.2701	43.584	38.6097	45.819	38.6038	48.7806	45.1744	47.4197						304	0	0	0	0.1	0	0	0	0.1	0.424264	0
305	67.3414	51.6121	34.2701	43.546	38.6749	45.819	38.6038	48.7806	45.5791	47.4197						305	0	0	0.1	0	0	0	0	0	0	0
306	67.3414	51.6121	34.2701	43.546	38.6097	45.9595	38.6038	49.263	45.71	47.4197						306	0	0	0	0	0	0	0	0.3	0	0.3
307	67.3414	51.6121	34.2701	43.459	38.7617	45.9595	38.6038	49.263	45.8893	47.4197						307	0	0	0	0	0	0	0.1	0.1	0	0
308	67.3414	51.6121	34.2701	43.3721	38.7617	45.9595	38.6038	49.263	46.2794	47.4197						308	0	0	0	0	0	0	0.565685	0	0.223607	0
309	67.5258	51.6121	34.2701	43.2852	38.7617	45.9595	38.6038	49.3595	46.1864	47.4197						309	0	0	0.1	0	0	0	0	0	0.1	0
310	67.5258	51.6121	34.2701	43.2852	38.7617	45.9595	38.6038	49.263	46.1864	47.4197						310	0	0	0	0	0	0	0	0	0	0
311	67.7113	51.6121	34.1728	43.2852	38.6443	45.9595	38.6038	49.07	46.1864	47.4197						311	0	0	0	0	0	0	0.223607	0	0	0
312	67.5809	51.6121	34.2212	43.2852	38.6569	45.9595	38.8102	49.07	46.1864	47.4197						312	0	0	0	0	0	0	0	0	0	0
313	67.5809	51.6121	34.0346	43.2852	38.7338	45.9595	39.0825	49.07	46.1864	47.4197						313	0	0	0	0	0	0	1.47648	0	0	0
314	67.5809	51.6121	34.0346	43.2852	38.7977	45.9595	39.1483	49.07	45.7974	47.4197						314	0	0	0	0	0	0	1.20416	0	0	0
315	67.5809	51.6121	33.9443	43.2852	38.7977	45.8976	39.2143	49.07	45.761	47.4197						315	0	0	0.1	0	0	0	0.223607	0	0	0
316	67.5809	51.6121	33.9443	43.2852	38.7977	45.8976	39.3467	49.07	45.3015	47.4197						316	0	0	0	0	0	0	0.1	0.608276	0.141421	0
317	67.418	51.6121	33.9443	43.2852	38.7977	45.8976	39.3467	49.07	45.1725	47.4197						317	0	0	0	0	0.1	0	0.360555	0.5	0	0
318	67.418	51.8347	33.9443	43.2852	38.7977	45.662	39.6208	49.07	45.1725	47.4197						318	0	0	0	0	0	0	0.1	0	0.1	0
319	67.418	51.8347	33.9443	43.2852	38.7977	45.662	39.5463	49.07	45.079	47.4197						319	0	0	0	0	0	0	0	0	0	0
320	67.418	51.8347	33.9443	43.2852	38.7977	45.4432	39.5463	49.07	45.079	47.4197						320	0	0	0	0	0	0	0.1	0	0	0
321	67.418	51.8347	33.9443	43.2852	38.7852	45.4432	39.5463	49.07	45.079	47.4197						321	0	0	0	0	0	0	0.2	0	0	0.1
322	67.418	51.8347	33.9443	43.2852	38.7852	45.4432	39.4719	49.07	45.079	47.4197						322	0	0	0	0.1	0	0	0.1	0	0	0
323	67.418	51.8347	33.9443	43.2852	38.7617	45.4432	39.4719	49.07	45.079	47.4197						323	0	0	0	0	0	0	0.360555	0	0	0
324	67.418	51.8347	33.9443	43.2852	38.7617	45.4432	39.4719	48.9735	44.8135	47.4197						324	0	0	0	0	0	0	0.2	0.2	0.1	0
325	67.418	51.8347	33.9443	43.2357	38.9905	45.4432	39.4719	48.9735	44.9067	47.4197						325	0	0	0	0	0.141421	0	0.2	0.1	0	0
326	67.418	51.8347	34.2154	43.263	38.9905	45.4432	39.4719	48.7806	44.8135	47.4197						326	0	0	0	0	0.1	0	0.360555	0	0	0
327	67.418	51.8347	34.2154	43.3118	38.9905	45.4432	39.4719	49.1665	44.9067	47.5067						327	0	0	0	0	0	0	0.1	0	0	0
328	67.418	51.8347	34.2154	43.3607	38.9905	45.4432	39.4719	49.263	45.2954	47.5067						328	0	0	2.14009	0	0	0	0.360555	0	0	0
329	67.418	51.8347	34.3058	43.3607	38.9905	45.4432	39.4719	49.263	45.2954	47.5067						329	0	0	0.583095	0	0	0	0.1	0	0	0
330	67.418	51.8347	34.3058	43.3607	38.9905	45.4432	39.4719	48.9735	45.2954	47.768						330	0	0	0.424264	0	0	0	0	0	0	0
331	67.418	51.8347	34.3058	43.3607	38.9905	45.4432	39.3976	48.8771	45.2954	47.768						331	0	0	0.282843	0	0.412311	0	0	0	0	0
332	67.418	51.8347	34.3058	43.3607	38.9905	45.4432	39.3728	48.8771	45.462	47.768						332	0	0	0	0	0	0	0	0	0	0
333	67.418	51.8347	34.2154	43.3607	38.9905	45.4432	39.3728	48.8771	45.4991	47.768						333	0	0	0	0.360555	0	0	0	0	0	0
334	67.418	51.8347	34.2154	43.3607	38.9905	45.4432	39.3728	48.8771	45.4991	47.768						334	0	0	0.2	0.1	0	0	0.412311	0.8	0	0
335	67.418	51.8347	34.2154	43.3607	38.9905	45.4432	39.4518	48.8771	45.4991	47.768						335	0	0	0	0	0	0	0.360555	0.412311	0	0
336	67.418	51.8347	34.2154	43.3607	38.9905	45.4432	39.4518	48.8771	45.4991	47.768						336	0	0	0	0.412311	0	0	0.1	0.4	0	0
337	67.418	51.8347	34.2154	43.3607	38.9905	45.4432	40.8842	48.8771	45.4991	47.768						337	0	0	0	0.1	0	0	0.1	0	0	0
338	67.418	51.8347	34.2154	43.3607	38.9905	45.4432	39.6801	48.8771	45.4991	47.768						338	0	0	0	0	0	0	0.1	0	0	0
339	67.418	51.8347	34.3058	43.3607	38.9905	45.4432	39.4719	48.8771	45.4991	47.768						339	0	0	0	0	0	0	0	0.1	0	0
340	67.418	51.8347	34.3058	43.3607	38.9905	45.4432	39.4051	48.3254	45.6291	47.768						340	0	0	0	0	0.1	0	0.1	0.141421	0	0
341	67.418	51.8347	34.3058	43.3607	39.067	45.4432	39.3167	48.8072	45.6291	47.768						341	0	0	0	0	0.1	0	0	0.3	0.2	0
342	67.418	51.8347	34.3058	43.3607	39.067	45.4432	39.2494	48.8072	45.5363	47.768						342	0	0	0	0	0.1	0	0	0.2	0	0
343	67.418	51.8347	34.3058	43.3607	39.067	45.4432	39.2494	48.8072	45.5363	47.768						343	0	0	0	0	0.1	0.141421	0.1	0.1	0	0.223607
344	67.418	51.8347	34.3058	43.3607	39.067	45.4432	39.1822	48.8072	45.5363	47.768						344	0	0	0	0	0.1	0	0.1	0	0.223607	0
345	67.418	51.8347	34.3058	43.3607	39.067	45.4432	39.3307	48.8072	45.5363	47.6809						345	0	0	0	0	0	0	0.1	0	0	0
346	67.418	51.8347	34.3058	43.4097	39.067	45.4432	39.2564	48.8072	45.5363	47.6809						346	0	0	0	0	0	0	0.1	0.3	0.2	0
347	67.418	51.8347	34.3058	43.4097	39.067	45.4432	39.3467	48.8072	45.5363	47.6809						347	0	0	0	0	0	0	0	0	0.1	0
348	67.418	51.8347	34.3058	43.4097	39.067	45.4432	39.1972	48.6144	45.4436	47.6809						348	0	0	0	0	0	0	0.1	0	0.1	0
349	67.418	51.8347	34.3058	43.4097	39.0551	45.4432	39.3307	48.7108	45.4436	47.6809						349	0	0	0	0.1	0.1	0	0.1	0	0.1	0
350	67.418	51.8347	34.3058	43.4097	39.1198	45.4432	39.3842	48.7108	45.4436	47.6809						350	0	0	0.447214	0.2	0.2	0	0.1	0.4	0	0
351	67.418	51.8347	34.3058	43.4097	39.1198	45.4432	39.3105	48.7108	45.4436	47.6809						351	0	0	0	0.1	0.1	0	0.1	0	0.1	0
352	67.418	51.8347	33.3748	43.4097	39.1198	45.4432	39.6668	48.7108	45.4436	47.6809						352	0	0	0	0.360555	0	0	0	0	0.1	0
353	67.418	51.8347	33.3544	43.4097	39.1198	45.4432	39.5993	48.7108	45.4436	47.6809						353	0	0	0	0.1	0	0.2	0.3	0	0.141421	0
354	67.418	51.8347	33.4706	43.4097	39.1198	45.4432	39.5993	48.7108	45.4436	47.6809						354	0	0	0	0	0	0	0.141421	0.1	0	0
355	67.418	51.8347	33.3926	43.4097	39.4558	45.4432	39.5993	48.7108	45.4436	47.6809						355	0	0	0	0	0	0	0	0	0.1	0
356	67.418	51.8347	33.3926	43.4097	39.4558	45.4432	39.5993	48.7108	45.4436	47.6809						356	0	0	0.447214	0	0.223607	0	0	0	0	0
357	67.418	51.8347	33.3926	43.0884	39.4558	45.4432	39.5993	48.7108	45.4436	47.6809						357	0	0	0.806226	0	0	0	0.3	0	0	0
358	67.418	51.8347	33.5673	43.0396	39.4558	45.4432	39.2369	48.5034	45.4436	47.6809						358	0	0	0.223607	0	0	0	0.141421	0	0	0
359	67.418	51.8347	33.5673	43.0396	39.4558	45.4432	39.5931	48.5013	45.4436	47.6809						359	0	0	0.223607	0	0.640312	0	0.2	0	0	0
360	67.418	51.8347	33.5673	42.9342	39.4558	45.4432	39.5195	48.4056	45.4436	47.6809						360	0	0	0.2	0.1	0	0.1	0.223607	0	0	0
361	67.418	51.8347	33.5673	42.9821	39.4558	45.4432	39.4461	48.4056	45.4436	47.6809						361	0	0	0	0	0	0.2	0.1	0	0	0
362	67.418	51.8347	33.5673	42.9821	39.4558	45.4432	39.5195	48.4056	45.4436	47.6809						362	0	0	0	0	0.223607	0.141421	0.2	0	0.4	0
363	67.418	51.8347	33.5673	42.9821	39.4558	45.4432	39.5195	48.3084	45.4436	47.6809						363	0	0	0.4	0	0.1	0	0.1	0	0	0
364	67.418	51.8347	33.5673	42.9821	39.3907	45.4432	39.5931	48.1877	45.4436	47.6809						364	0	0	0.223607	0	0.223607	0	0.1	0.2	0	0
365	67.418	51.8347	33.5673	42.9821	39.3256	45.4432	39.5931	47.8961	45.2581	47.6809						365	0	0	0	0.860233	0	0	0.5	0.282843	0	0
366	67.418	51.8347	33.5673	42.9821	39.3907	45.4432	39.5931	47.7017	45.2581	47.6809						366	0	0	0.2	0.141421	0	0	0.316228	0	0.2	0
367	67.418	51.8347	33.5673	42.9821	39.3256	45.5837	39.5195	47.7989	45.2581	47.8663						367	0	0	0.608276	0	0	0	0.1	0.1	0.1	0
368	67.418	51.8347	33.5673	42.9821	39.2608	45.5837	39.5931	47.7989	45.1107	47.8663						368	0	0	0	0	0	0	0	0	0.1	0
369	67.418	51.8347	33.5673	42.9821	39.2608	45.5837	39.5195	47.7989	45.1107	47.8663						369	0	0	0	0.640312	0	0	0.4	0	0	0
370	67.418	51.8347	33.5673	42.9821	39.2608	45.5837	39.5931	47.5075	45.2958	47.8663						370	0	0	0	0	0.141421	0	0.538516	0	0	0
371	67.418	51.8347	33.5673	42.9821	39.2608	45.5837	39.5931	47.5075	45.3884	47.8663						371	0	0	0.223607	2.41661	0	0.1	0	0	0.1	0
372	67.418	51.8347	33.5673	42.9821	39.2608	45.5837	39.5255	47.5075	45.4811	47.8663						372	0	0	0	0.1	0.141421	0	0.141421	0	0.1	0.1
373	67.418	51.8347	33.5673	43.0699	39.3256	45.5837	39.5993	47.5075	45.3884	47.8663						373	0	0	0	0.412311	0	0	0	0	0	0
374	67.418	51.8347	33.5508	42.9744	39.4779	45.5837	39.5255	47.119	45.3884	47.8663						374	0	0	0	0.1	0	0	0	0	0	0
375	67.418	51.8347	33.5508	43.022	39.4017	45.5837	39.458	47.119	45.4811	47.8663						375	0	0	0	0.412311	0	0	0	0	0.1	0
376	67.418	51.8347	33.5508	43.056	39.4017	45.5837	39.458	47.119	45.4436	47.8663						376	0	0	0	0	0	0	0.1	0	0	0.3
377	67.418	51.8347	33.5508	43.0091	39.4017	45.4596	39.2564	47.119	45.4991	47.8663						377	0	0	0	0.3	0	0	0	0	0	0.360555
378	67.418	51.8347	33.5508	43.0091	39.4017	45.4596	39.3976	47.2161	45.4991	47.8663						378	0	0	0.5	0.141421	0.2	0	0.1	0	0.223607	0
379	67.418	51.8347	33.5508	43.0091	39.4017	45.4596	39.3976	47.2161	45.4062	47.8663						379	0	0	0	0	0.1	0	0	0	0.1	0
380	67.418	51.8347	33.5404	43.0091	39.6189	45.4596	39.3976	47.2161	45.4062	47.8663						380	0	0	0	0.583095	0	0	0.1	0	0.1	0
381	67.418	51.8347	33.5813	43.0091	39.6189	45.4596	39.6208	47.2161	45.4062	47.8663						381	0	0	0	0	0	0	0.5	0	0.1	0
382	67.418	51.8347	33.7172	43.0091	39.6189	45.4596	39.4796	47.2161	45.4062	47.8663						382	0	0	0	0.2	0	0	0.565685	0.223607	0	0
383	67.418	51.8347	33.5403	43.0091	40.2476	45.4596	39.3467	47.2161	45.4062	47.8663						383	0	0	0	0.1	0	0	0.583095	0	0.1	0
384	67.418	51.8347	33.7207	43.056	40.2476	45.3978	39.4051	47.2161	45.4062	47.8663						384	0	0	0	0.1	0	0	0.141421	0	0	0.509902
385	67.418	51.8347	33.7207	43.056	40.2476	45.2406	39.3307	47.2161	45.4062	47.8663						385	0	0	0	0.1	0	0	0.412311	0	0	0
386	67.418	51.8347	33.7207	43.056	40.4536	45.1002	39.4796	47.2161	45.0352	47.8663						386	0	0	0	0	0	0	0.2	0	0	0
387	67.418	51.8347	33.36	43.056	40.3886	45.1002	39.4051	47.2161	45.0352	47.8663						387	0	0	0	0.316228	0	0	0	0	0.141421	0
388	67.418	51.8347	33.2239	43.056	40.1827	45.1002	39.3307	47.2644	45.0352	47.8663						388	0	0	0	1.31529	0	0.1	0	0	0	0.3
389	67.418	51.8347	33.2239	42.2873	40.1827	45.1002	38.8403	47.5073	45.0352	47.8663						389	0	0	0	0	0	0	0	0	0	0.316228
390	67.418	51.8347	33.3122	42.2451	40.1827	45.1002	39.1307	47.5073	45.2207	47.8663						390	0	0	0	0.1	0	0	0.141421	0	0	0
391	67.418	51.8347	33.8072	42.2451	40.1827	45.1002	39.2055	47.6042	45.3134	47.8663						391	0	0	0	0	0	0.141421	0	0	0.1	0
392	67.418	51.8347	33.8072	42.2451	40.1827	45.1002	39.2055	47.6042	45.2207	47.8663						392	0.312677	0	0.640312	0.141421	0	0	0	0	0	0
393	67.418	51.8347	33.8072	42.3714	40.1827	45.1002	38.907	47.6042	45.2207	47.8663						393	0	0	0.1	0.1	0	0.141421	0	0	0.1	0.1
394	67.418	51.8347	33.8072	42.3714	40.0417	45.1002	39.4131	47.6042	45.2207	47.8663						394	0	0	0	0.5	0.2	0.424264	0	0	0	0
395	67.418	51.8347	34.0308	42.3384	40.0417	45.0217	39.4131	47.6042	45.1279	47.8663						395	0	0	0	0	0	0.1	0	0.2	0.141421	0
396	67.418	51.8347	34.0308	42.3785	39.9008	45.0217	39.4051	47.6042	45.2207	47.7793						396	0	0	0	0.1	0	0.316228	0	0	0	0
397	67.418	51.8347	34.0308	42.6322	39.9008	45.0217	39.4051	47.6042	45.2207	47.7793						397	0	0	0	0.447214	0	0	0	0	0	0
398	67.418	51.8347	34.0308	42.6732	39.9008	45.0217	39.4051	47.6042	45.2207	47.7793						398	0	0	0.2	0.360555	0	0.1	0	0	0	0
399	67.418	51.8347	34.0308	42.3505	39.9008	45.0217	39.4051	47.6042	45.3134	47.7793						399	0	0	0	0.141421	0	0	0	0	0.1	0
400	67.418	51.8347	34.0308	42.3505	39.9008	45.0217	39.4796	47.6042	45.3134	47.9282						400	0	0	0	0	0	0	0	0.1	0.3	0
401	67.418	51.8347	34.0308	42.2263	39.9008	45.0217	39.4796	47.6042	45.3134	47.9058						401	0	0	0	0.640312	0.141421	0	0	0	0	0
402	67.418	51.8347	34.5216	42.2767	39.7715	45.0217	39.4051	47.6042	45.3322	47.9058						402	0	0	0	0.632456	0.509902	0	0	0.1	0.1	0
403	67.418	51.8347	34.5216	42.2767	39.7071	45.0217	39.4051	47.6042	45.2392	47.9058						403	0.601813	0	0	0.1	0	0	0	0.1	0.1	0
404	67.418	51.8347	34.5216	42.7558	39.7071	45.0217	39.4796	47.6042	45.3322	47.9058						404	0.235948	0	0	0.806226	0	0.1	0	0	0.1	0
405	67.418	51.8347	34.5216	42.7558	39.7071	45.0217	39.1081	47.6042	45.2392	47.9058						405	0	0	0.2	0.316228	0	0.2	0	0	0	0
406	67.418	51.8347	34.5216	42.8392	39.7071	45.0217	39.6732	47.7737	45.2392	47.9058						406	0	0	0	0.223607	0	0.141421	0	0.1	0.1	0
407	67.418	51.8347	34.5216	42.7974	39.7071	45.0217	40.2451	47.7737	45.2024	47.9058						407	0	0	0	0.141421	0	0.223607	0	0.1	0	0
408	67.418	51.8347	34.5216	42.7065	39.7071	45.0217	40.1038	47.7737	45.2024	47.526						408	0	0	0	0	0	0	0	0.1	0	0
409	67.418	51.8347	34.5216	42.7484	39.7071	45.0217	39.762	47.7737	45.2024	47.526						409	0	0	0	0	0	0.141421	0	0.1	0	0.3
410	67.418	51.8347	34.5216	42.7484	39.7071	45.0217	39.6131	47.7737	45.2024	47.526						410	0	0	0.141421	0	0.2	0.1	0	0.2	0	0
411	67.418	51.8347	34.5216	42.7847	39.7071	45.0217	39.6131	47.7737	45.0727	47.526						411	0	0	0	0.5	0.282843	0.360555	0.412311	0.2	0	0
412	67.418	51.8347	34.5216	43.1766	39.7071	44.9597	39.6131	47.7737	45.0727	47.6801						412	0.155721	0	0	0.1	0.4	0	0	0	0.1	0
413	67.418	51.8347	34.5216	43.1766	39.7071	44.9597	39.6131	47.7737	45.0727	47.921						413	0	0.282843	0	0	0	0.1	0.1	0	0.141421	0
414	67.418	51.8347	34.5216	43.2219	39.7071	44.9597	39.6059	47.7737	45.0727	47.921						414	0	0	0	0	0	0.141421	0.223607	0	0	0
415	67.418	51.8347	34.5216	43.2219	39.7071	44.8193	39.6059	47.7737	45.1658	47.921						415	0	0	0	0.223607	0	0	0	0.1	0.761577	0.5
416	67.418	51.8347	35.1465	43.3565	39.7071	44.8193	39.6059	47.7737	45.1658	47.921						416	0	0	0	0.141421	0	0	0	0.1	0.223607	0.2
417	67.418	51.8347	35.0567	43.4455	39.7071	44.6789	39.6059	47.7737	45.0727	47.973						417	0	0	0	0.1	0.632456	0	0.412311	0	0.1	0.5
418	67.418	51.8347	35.0567	43.9383	39.8361	44.2576	39.6059	47.7737	45.0727	47.973						418	0	0	0.2	0	0	0	0.1	0	0.141421	0
419	67.418	51.8347	35.0567	43.9383	39.8361	44.3194	39.6059	47.9677	45.2024	47.973						419	0	0.3	0.360555	0.223607	0	0.360555	0	0	0.2	0
420	67.418	51.8347	35.0567	43.8493	39.8361	44.0221	39.6059	47.9677	45.2024	47.973						420	0	0	0.223607	0	0	0	0	0	0.223607	0.2
421	67.418	51.8347	35.0567	43.4894	39.8361	44.0221	39.6059	47.9677	45.2024	47.973						421	0	0	0	0	0	0	0	0.4	0.412311	0.1
422	67.418	51.8347	34.8775	43.3132	39.8361	43.9438	39.6059	47.9677	45.2024	47.973						422	0	0	0	0	0	0	0.1	0	0	0
423	67.418	51.8347	34.8775	43.1785	39.8361	43.9438	39.6059	47.9677	45.2954	47.973						423	0	0	0.223607	0	0.806226	0	0	0.1	0.1	0.141421
424	67.418	51.8347	34.8775	43.1785	39.8361	43.9438	39.6059	48.0648	45.0164	47.973						424	0	0	0	0	0	0	0	0	0.141421	0.1
425	67.418	51.8347	34.8775	43.3102	39.977	43.9438	39.6059	48.0648	45.0164	47.973						425	0	0	0	0	0.141421	0.1	0	0	0.316228	0.728011
426	67.418	51.8347	34.8775	42.8668	40.3778	43.9438	39.6059	47.9677	45.1094	47.973						426	0.352341	0	0	0	0	0	0	0	0.1	0.509902
427	67.418	51.8347	34.8775	42.8234	40.3778	43.9438	39.6059	48.0648	45.0164	47.973						427	0	0	0.1	0	0	0	0.3	0.1	0	0.412311
428	67.418	51.8347	34.8775	42.3922	40.3778	44.0061	39.6059	48.0648	45.1094	47.973						428	0	0	0	0	0	0	0.2	0	0	0.3
429	67.418	51.8347	34.789	42.6234	40.3778	44.1311	39.6059	48.0648	45.1094	47.973						429	0.162619	0	0.1	0	0	0	0	0	0.1	0.412311
430	67.418	51.8347	34.789	42.6322	40.3778	43.9905	39.6059	47.9677	45.0164	47.973						430	0	0	0.447214	0	0.2	0.1	0	0	0.282843	0.1
431	67.418	51.8347	34.789	42.6827	40.3778	43.8976	39.6059	48.0648	45.0164	47.973						431	0	0	0	0	0.1	0	0	0.4	0.424264	0.4
432	67.418	51.8347	34.789	42.6827	40.3778	43.8976	39.6059	47.9677	45.0164	47.973						432	0	0	0	0	0.316228	0.1	0	0.1	0.806226	0
433	67.418	51.8347	34.789	42.6827	40.3778	43.757	39.6059	48.0648	45.0164	48.2293						433	0	0	0	0	0	0	0	0	0.1	0
434	67.418	51.8347	34.6553	42.6827	40.2476	43.8347	39.6059	47.8707	45.0164	48.2293						434	0	0	0	0	0.1	0	0.1	0	0	0
435	67.418	51.8347	34.6553	42.8883	39.9656	44.1938	39.9699	48.0648	45.0164	48.2293						435	0	0	0	0	0	0	0.223607	0	0	0
436	67.418	51.8347	34.6553	42.93	40.2264	44.1938	39.9699	48.0648	45.0534	48.2293						436	0	0	0	0.4	0	0	0	0	0	0.316228
437	67.418	51.9497	34.6553	42.93	40.2264	44.116	40.0368	48.0648	44.9978	48.2293						437	0	0	0.424264	0.2	0.1	0	0	0	0	0
438	67.418	51.9497	34.6553	42.93	40.2264	44.1311	39.9557	48.0648	44.9978	48.2293						438	0	0	0	0	0	0	0.1	0	0	0
439	67.418	51.9497	34.6553	42.7558	40.2264	44.1311	39.9557	47.9677	44.4614	47.972						439	0	0	0	0.141421	0	0	0.1	0	0	0
440	67.418	51.9497	34.6553	42.8055	40.2264	44.1311	39.9557	48.0648	44.6119	47.8702						440	0.696118	0	0	0.1	0	0	0	0	0	0
441	67.418	51.9497	34.6553	42.7644	40.7718	44.1311	39.7287	48.0648	44.7053	47.9282						441	0	0	0	0.223607	0.1	0	0	0	0	0
442	67.418	51.9497	34.4757	42.7644	40.7718	44.1311	39.8022	48.0648	44.763	47.9282						442	0	0	0	0.141421	0.412311	0	0	0	0	0
443	67.418	51.8436	34.296	42.6234	40.7718	43.7719	39.8022	48.0648	44.6924	47.9282						443	0	0	0	0.141421	0.1	0	0	0	0	0
444	67.418	51.8436	34.1171	42.6234	40.7718	43.7719	39.8022	48.0648	44.8448	47.8288						444	0	0	0.316228	0	0.1	0	0	0	0	0
445	67.418	51.8436	34.1171	42.6234	40.7718	43.7719	39.8022	47.9698	44.8013	47.7793						445	0	0	0	0	0.1	0	0	0	0	0
446	67.418	51.8436	34.1171	42.6234	40.7718	43.7719	39.8757	47.9698	44.8013	47.7793						446	0	0	0.1	0.707107	0	0	0	0	0	0
447	67.418	51.8436	33.9387	42.6234	41.5618	43.7719	39.8757	48.0671	44.7675	47.8171						447	0	0	0	0.1	0.141421	0.141421	0.1	0	0	0
448	67.418	51.8436	33.9387	42.6234	41.5618	43.7719	39.8757	48.0671	44.7072	47.73						448	0	0	0	0	0.223607	0.141421	0.1	0	0	0
449	67.418	51.8436	33.9387	42.6234	41.7029	43.8347	39.8757	48.0671	44.904	47.5647						449	0	0	0	0	0.608276	0	0.1	0	0	0
450	67.418	51.8436	33.9387	42.6234	41.7029	43.8347	39.8757	48.0671	44.9386	47.4153						450	0	0	0	0.1	0.3	0	0.1	0	0	0
451	67.418	51.8436	34.0285	42.6234	41.7029	43.8347	39.6554	47.9698	44.9386	47.3171						451	0	0	0	0	0	0	0	0	0	0
452	67.418	51.8436	34.0285	42.6234	41.7029	43.8347	39.8022	47.9698	44.9386	47.179						452	0	0	0	0	0	0	0	0	0	0
453	67.418	51.8436	33.9387	42.6234	41.7029	43.8347	39.8022	47.9698	44.8448	46.908						453	0	0	0	0.1	0	0	0	0	0.1	0
454	67.418	51.8436	33.9391	42.6234	41.8348	43.7719	39.8022	47.9698	44.5879	46.8188						454	0	0	0	0	0	0.1	0	0	0.1	0
455	67.418	51.8436	33.9391	42.6234	41.7688	43.7719	39.8022	47.878	44.7675	46.6391						455	0	0	0	0	0.223607	0	0	0	0.1	0
456	67.418	51.8436	33.9391	42.6234	41.4961	43.7093	39.8022	47.8555	44.4093	46.6391						456	0	0	0	0.3	0	0	0	0	0	0
457	67.418	51.8436	33.9391	42.6234	41.4961	43.7093	39.8022	47.8555	44.504	46.6391						457	0	0	0	0	0.1	0	0	0	0	0
458	67.418	51.8436	33.9391	42.6234	41.5618	43.7093	39.7287	47.8555	44.504	46.6391						458	0	0	0.447214	0.1	0.1	0	0	0	0	0.141421
459	67.158	51.8436	33.9391	42.6234	41.5618	43.7093	39.6668	47.8555	44.504	46.6391						459	0	0	0.447214	0.282843	0	0	0.316228	0	0	0.608276
460	67.158	51.8436	33.9391	42.4593	41.5618	43.7093	39.6668	47.8555	44.504	46.4163						460	0	0	0	0	0.141421	0.1	0.141421	0	0.1	0
461	67.158	51.8436	34.3428	42.3785	41.4961	43.7093	39.6668	47.8555	44.504	46.4163						461	0	0	0	0	0	0	0.1	0	0.1	0
462	67.158	51.8436	34.3428	42.3785	41.4961	43.7093	39.7405	47.8555	44.504	46.4163						462	0	0	0	0	0	0.1	0	0	0.1	0.282843
463	67.158	51.8436	34.3428	42.43	41.4961	43.7093	39.8144	47.8555	44.504	46.4163						463	0	0	0	0	0	0.1	0.1	0	0	0
464	67.158	51.8436	34.3428	42.3902	41.4961	43.7093	39.8144	47.8555	44.504	46.4163						464	0	0	0	0	0	0	0.1	0	0	0
465	67.158	51.8436	34.3428	42.4031	41.5618	43.7093	39.8144	47.8555	44.504	46.4163						465	0	0	0.583095	0	0	0	0.1	0	0	0
466	67.158	51.8436	34.3428	42.456	41.9293	43.7093	39.8144	47.8555	44.504	46.4163						466	0	0	0.1	0	0	0	0.1	0	0.2	0
467	67.158	51.8436	34.3428	42.5094	42.0049	43.7093	39.8144	47.8555	44.504	46.4163						467	0	0	0	0	0	0.1	0.1	0	0	0
468	67.158	51.8436	34.5646	42.5094	42.0807	43.7093	39.8144	47.8555	44.504	46.4163						468	0	0.316228	0	0	0	0	0	0	0	0
469	67.158	51.8436	34.5646	42.5094	42.1565	43.7093	39.8144	47.8555	44.504	46.4163						469	0	0.1	0	0	0.141421	0	0	0.1	0	0
470	67.1885	51.8436	34.6539	42.1507	42.1565	43.7093	39.8144	47.8555	44.504	46.4163						470	0	0.1	0	0	0.640312	0	0	0.1	0	0
471	67.1586	51.8436	34.6539	42.2435	42.146	43.6941	39.7472	47.8555	44.504	46.4163						471	0	0	0	0	0.1	0	0	0.3	0.1	0
472	67.1586	51.8436	34.6539	42.2435	42.2325	43.8347	39.8213	47.8555	44.504	46.4163						472	0	0	0.223607	0	0.2	0	0	0.1	0.1	0
473	67.1586	51.8436	34.6539	42.2435	42.6261	43.8347	39.8956	47.8555	44.504	46.4163						473	0	0	0	0.1	0.141421	0	0.1	0	0.1	0
474	67.1586	51.8436	34.6539	42.2809	42.8192	43.8347	39.9699	47.8555	44.504	46.4163						474	0	0	0	0	0.1	0	0	0	0.1	0
475	67.1586	51.8436	34.6539	42.2809	42.8192	43.8347	39.9699	47.8555	44.504	46.4163						475	0	0	0	0	0	0	0.1	0	0	0
476	67.1586	51.8436	34.6539	42.2809	42.8192	43.8347	39.9699	47.8555	44.504	46.4163						476	0	0	0	0	0.2	0.282843	0.447214	0.1	0	0
477	67.1586	51.8436	34.6539	42.3736	42.8192	43.8347	39.9699	47.8555	44.4093	46.4163						477	0	0	0	0.1	0.141421	0	0	0.1	0	0
478	67.1586	51.8436	34.6539	42.3736	42.8192	43.7719	39.9699	47.8555	44.504	46.4163						478	0	0	0	0	0	0	0	0.1	0	0
479	67.0304	51.8436	34.6539	42.3736	42.6138	43.7719	39.9699	47.8555	44.4093	46.4163						479	0	0	0	0	0.223607	0	0	0.1	0	0
480	67.0304	51.8436	34.6539	42.4867	42.6138	43.7719	39.9699	47.8555	44.4093	46.4163						480	0	0	0	0	0.223607	0	0	0	0	0
481	67.0304	51.8436	34.6539	42.4867	42.6782	43.7719	39.9699	47.8555	44.4093	46.4163						481	0	0	0	0	0.141421	0	0.3	0	0.1	0
482	67.0304	51.8436	34.2067	42.4488	42.6138	43.7719	39.9699	47.8555	44.4093	46.3709						482	0	0	0	0	0.141421	0	0	0	0.6	0
483	67.0304	51.8436	33.9414	42.34	42.6138	43.7719	39.6801	47.8555	44.4093	46.5515						483	0	0	0	0	0.3	0	0	0.3	0.1	0
484	67.0304	51.8436	33.9414	42.34	42.6261	43.8499	39.6875	47.8555	44.504	46.5515						484	0	0	0	0	0.1	0	0	0	0	0
485	67.0304	51.8436	33.9414	42.34	42.6261	43.8499	39.762	47.8555	44.4093	46.5515						485	0	0.223607	0	0	0	0	0	0	0.223607	0
486	67.0304	51.8436	33.9414	42.34	42.6261	43.9125	39.762	47.8555	44.3147	46.6393						486	0	0	0.316228	0	0	0	0	0	0.282843	0
487	67.0304	51.8436	33.9414	42.34	42.6261	43.8499	39.6875	47.8555	44.3147	46.6393						487	0	0	0.141421	0	0	0	0	0.3	0.1	0
488	67.0304	51.8436	33.9414	42.34	42.6261	43.8499	39.6131	47.8555	44.3147	46.6393						488	0	0	0.223607	0.447214	0.412311	0	0	0	0	0
489	67.0304	51.8436	33.983	42.34	42.6261	43.8499	39.5388	47.8555	44.3147	46.6393						489	0	0	0	0.905539	0.141421	0	0	0	0	0
490	67.0304	51.8436	33.8935	42.34	42.6261	43.8499	39.6131	47.8555	44.504	46.6393						490	0	0	0.223607	0.223607	0.1	0	0	0	0	0
491	67.0304	51.8436	33.8935	42.34	42.6261	43.9279	39.5388	47.8555	44.504	46.6393						491	0	0	0	0.4	0	0	0	0	0.223607	0
492	67.0304	51.8563	33.8935	42.34	42.6261	43.9279	39.5388	47.8555	44.504	46.6393						492	0	0	0	0.412311	0	0.1	0	0	0	0
493	66.8309	51.9497	33.8935	42.34	42.4852	43.9279	39.5388	47.7581	44.504	46.6393						493	0	0	0	1.8868	0	0.1	0.1	0	0	0
494	66.8309	51.9854	33.8935	42.34	41.8451	43.9279	39.5388	47.8555	44.504	46.6393						494	0	0	0	0.2	0	0.412311	0	0	0	0
495	66.8309	51.9854	33.8935	42.34	41.9093	43.9279	39.5388	48.148	44.5987	46.6393						495	0	0	0	0.424264	0.1	0.360555	0	0	0	0
496	66.7393	51.9854	34.0285	42.34	42.0627	43.9279	39.5388	48.2455	44.504	46.6393						496	0	0	0	0	0	0.1	0.1	0	0.1	0
497	66.7393	51.9854	34.0285	42.3785	42.2035	43.9279	39.6131	48.2455	44.5987	46.6393						497	0	0	0	0.316228	0	0.3	0	0	0.2	0
498	66.7393	51.9854	34.0285	42.3785	42.2677	43.9279	39.6131	48.2455	44.504	46.6393						498	0	0	0	0.1	0	0.761577	0	0	0.2	0
499	66.7393	51.9854	34.0285	42.3785	42.2677	43.9279	39.5388	48.2455	44.504	46.6393						499	0	0	0	0.141421	0	0.3	0	0	0	0
500	66.7393	51.9854	34.0285	42.3785	42.3964	44.2091	39.7038	48.148	44.504	46.6393						500	0	0	0.360555	0	0	0.316228	0	0	0.1	0
501	66.7393	51.9854	34.0285	42.4172	42.4086	44.2091	39.7038	48.2455	44.504	46.6393						501	0	0	0	0.1	0	0.2	0	0	0	0.2
502	66.7393	51.9854	34.0285	42.4172	42.4086	44.2091	39.7038	48.148	44.504	46.6393						502	0	0	0	0.1	0	0.608276	0	0.1	0.1	0.223607
503	66.7393	51.9854	34.0285	42.4172	42.461	44.2091	39.7038	48.2455	44.504	46.6393						503	0	0	0	0	0	0	0.2	0	0.1	0.3
504	66.7393	51.9854	34.0285	42.4172	42.2555	44.2091	39.7038	48.2455	44.504	46.6393						504	0	0	0	0.141421	0	0.223607	0.1	0	0.1	0
505	66.7393	51.9854	34.0285	42.4172	42.2437	44.2091	39.9291	48.2455	44.5362	46.6393						505	0	0	0.141421	0	0	0.1	0	0	0.141421	0.223607
506	66.7393	51.9854	34.0285	42.4172	42.2555	44.2091	39.9291	48.2455	44.7338	46.6393						506	0	0	0.1	0	0	0	0	0	0	0.316228
507	66.6453	51.9854	34.0285	42.4172	42.0627	44.2091	39.9291	48.5381	44.8281	46.6393						507	0	0	0	0.1	0	0.1	0	0.1	0	0
508	66.6453	51.9854	34.0285	42.4172	41.9987	44.2091	39.9291	48.5381	44.8281	46.6393						508	0	0	0	0	0.141421	0.1	0	0	0.1	0
509	66.6453	51.964	34.0285	42.4172	41.9987	44.2091	39.9291	48.5381	44.9834	46.6393						509	0	0	0	0.2	0	0	0	0.1	0.1	0
510	66.6453	51.964	34.2544	42.4172	41.9987	44.2091	39.9291	48.5381	44.7286	46.6393						510	0	0	0	0.1	0.1	0	0	0.1	0	0
511	66.6453	51.964	34.1209	42.4172	41.9987	44.2091	39.9291	48.2455	44.823	46.6393						511	0	0	0.1	0	0	0	0	0.3	0.282843	0
512	66.6453	51.964	33.8973	42.3902	42.1791	44.2091	39.9291	48.2455	44.823	46.6393						512	0	0	0.316228	0	0	0.1	0	0.2	0.640312	0
513	66.6453	51.964	33.8973	42.8468	42.1911	44.2091	39.9291	48.2455	44.823	46.6393						513	0	0	0	0	0	0	0	0	0.707107	0
514	66.6453	51.964	33.7207	43.0209	42.2555	44.2091	39.9291	48.2455	44.823	46.6393						514	0	0	0	0	0	0	0	0.4	1.2	0
515	66.6453	51.964	33.7207	43.1893	42.2555	44.2091	39.9291	48.2455	44.9795	46.6393						515	0	0	0	0.1	0	0	0	0.608276	0.223607	0
516	66.6453	51.964	33.7207	43.2705	42.2555	44.2717	39.9291	48.2455	44.9795	46.6393						516	0	0	0	0	0.1	0	0.1	0.3	0.223607	0.1
517	66.6453	51.964	33.7207	44.8763	42.2555	44.3344	39.8539	48.2455	44.9795	46.6393						517	0	0	0	0	0	0	0.1	0.2	0.6	0.1
518	66.6453	51.964	33.7207	44.9673	42.2555	44.6641	39.8539	48.2455	44.9795	46.6393						518	0	0	0	0	0	0	0.1	0.1	0	0
519	66.6453	51.964	33.7207	44.8393	42.1911	44.7003	39.8539	48.2455	44.9795	46.6393						519	0	0	0	0	0	0	0.1	0.1	0	0
520	66.6453	51.964	33.7207	44.8393	42.1911	44.7643	39.9291	48.2455	45.0741	46.6393						520	0	0	0	0	0	0	0.141421	0	0.3	0
521	66.6453	51.964	33.7207	44.8913	42.1911	44.9568	39.9291	48.2455	44.8849	46.6393						521	0	0	0	0	0	0	0	0	0	0
522	66.6453	51.964	33.7207	44.9795	42.1911	45.1838	39.9291	48.2455	45.0741	46.6393						522	0	0	0	0	0	0	0	0	0	0
523	66.6453	51.964	33.7207	44.9385	42.1911	45.3812	39.9291	48.2455	45.0741	46.6393						523	0	0	0	0	0	0	0.3	0	0	0
524	66.6453	51.964	33.3639	44.9385	42.1911	45.6546	39.9291	48.2455	45.0418	46.6393						524	0	0	0	0	0	0	0.2	0	0.1	0
525	66.6453	51.964	33.3639	44.9858	42.1911	45.8046	39.9291	48.2455	45.0418	46.5496						525	0.677579	0	0	0	0.1	0.1	0.141421	0	0.412311	0
526	66.6453	51.964	33.3639	44.9385	42.1911	46.3223	39.9291	48.343	44.9471	46.5502						526	0	0	0	0	0	0.1	0.538516	0	0.360555	0
527	66.6453	51.964	33.3639	44.9385	42.1911	46.3223	39.7788	48.343	44.8525	46.4182						527	0	0	0	0	0	0.1	0.2	0	0.1	0
528	66.6453	51.964	33.3639	44.8978	42.1911	46.2674	39.7038	48.343	44.9471	46.4182						528	0	0	0	0	0	0	0	0.1	0	0
529	66.6453	51.964	33.2307	44.8978	42.1911	46.2023	39.7038	48.343	45.0097	46.241						529	0	0	0	0.1	0.360555	0.1	0.1	0	0	0
530	66.6453	51.964	33.3212	44.8978	42.1911	46.2023	39.7038	48.343	45.0097	46.0211						530	0	0	0	0.1	0	0	0.2	0	0.4	0.1
531	66.6453	51.964	33.3212	44.8099	42.1911	46.1373	39.7038	48.4405	45.0097	46.0211						531	0	0	0	0.6	0	0	0.360555	0	0.707107	0
532	66.6453	51.964	33.3212	44.8099	42.2035	46.2135	39.7038	48.4405	44.9778	46.0211						532	0	0	0.860233	0.1	0.282843	0.1	0.3	0	0.1	0.1
533	66.6453	51.964	33.3212	44.6341	42.2035	46.2135	39.7038	48.343	45.0726	46.0211						533	0	0	0.538516	0	0	0	0.1	0	0	0.1
534	66.6453	51.964	33.3212	44.682	42.2803	46.2135	39.7038	48.2455	45.0726	46.0211						534	0	0	0.1	0	0	0	0.1	0	0.1	0
535	66.6453	51.964	33.2307	44.682	42.2803	46.2135	39.7038	48.5381	44.8197	46.0211						535	0	0	0	0	0	0	0.2	0	0.1	0
536	66.6453	51.964	33.27	44.682	42.2803	46.2783	39.7038	48.7332	45.1716	46.0211						536	0	0	0.2	0	0	0.2	0.2	0	0	0
537	66.6453	51.964	33.27	44.682	42.2803	46.2783	39.7038	48.7332	45.5008	46.0211						537	0	0	0.316228	0	0	0	0.1	0	0	0
538	66.6453	51.964	33.27	44.682	42.2803	46.2783	39.7038	49.1235	45.1672	46.0211						538	0	0	0.1	0	0.1	0	0.2	0	0.1	0
539	66.6453	51.964	33.27	44.6341	42.2803	46.2783	39.7038	49.0942	45.3337	46.0211						539	0	0	0.509902	0	0	0	0	0	0.1	0
540	66.6453	51.964	33.27	44.6341	42.2035	46.2783	39.7702	49.0333	45.185	46.1114						540	0	0	0	0	0	0.141421	0	0	0	0
541	66.6453	51.964	33.27	44.6341	42.2035	46.2783	39.845	48.9937	44.6058	46.0211						541	0	0	2.7313	0.707107	0.141421	0	0.5	0	0.2	0.1
542	66.6453	51.964	33.27	44.6341	42.2035	46.2783	39.7702	48.9742	44.6058	46.0211						542	0	0	0.509902	0.316228	0.5	0.1	0.282843	0	0.1	0
543	66.6453	51.964	33.27	44.6341	42.2035	46.2783	39.845	48.8761	44.6058	46.0211						543	0	0	0.447214	0.707107	0.282843	0	0.1	0	0	0
544	66.6453	51.964	33.27	44.6341	42.2035	46.2783	39.8366	48.8761	44.6854	46.0211						544	0	0	0.316228	0.538516	0.141421	0	0.316228	0.2	0	0
545	66.6453	51.964	33.27	44.6341	42.2035	46.2783	39.8366	48.8761	44.6854	46.0211						545	0	0	0	0.412311	0.2	0	0.282843	0.1	0	0
546	66.6453	51.964	33.27	44.6341	42.2035	46.2783	39.8366	48.8761	44.6854	46.0211						546	0	0	0	0.141421	0.1	0	0.5	0.316228	0	0.141421
547	66.6453	51.964	33.27	44.6341	42.2035	46.2783	40.0611	48.8761	44.6854	46.0211						547	0	0	0	0.282843	0	0	0.3	0.141421	0.1	0.1
548	66.6453	51.964	33.27	44.6341	42.2035	46.2783	39.9113	48.8761	44.7817	46.0211						548	0	0.1	0.1	0.1	0	0	0.316228	0	0.1	0
549	66.6453	51.964	33.27	44.6341	42.1395	46.2135	40.0525	48.8761	44.4236	46.0211						549	0	0	0	0.5	0	0	0	0	0	0
550	66.6453	51.964	33.27	44.6341	42.1395	46.1487	39.8144	48.8761	44.7669	46.0211						550	0	0	0	0	0.3	0	0.2	0	0	0
551	66.6453	51.964	33.27	44.6341	42.1395	46.225	39.9626	48.8761	44.7945	46.0211						551	0	0	0	0	0	0	0.2	0.1	0	0
552	66.6453	51.964	33.27	44.6341	42.1395	46.225	39.9626	48.8568	44.7945	46.0211						552	0	0	0.565685	0.2	0.223607	0	0.412311	0.141421	0	0
553	66.6453	51.964	33.27	44.682	41.7941	46.3015	40.0297	48.8568	44.7945	46.0211						553	0	0	1.48661	0.223607	0	0	0.538516	0.1	0	0
554	66.6453	51.964	33.27	44.6341	41.7941	46.3015	39.8818	48.8568	45.179	45.9782						554	0	0	0	0	0.1	0	0.1	0	0	0
555	66.6453	51.964	33.27	44.3503	41.7941	46.3015	40.2382	48.8568	44.5343	45.9782						555	0	0	0.806226	0.1	0.2	0	0	0	0	0
556	66.6453	51.964	33.1359	44.3972	41.5125	46.366	40.4605	48.8568	44.6302	45.8879						556	0	0	0.360555	0	0.1	0	0	0	0	0
557	66.6453	51.964	33.1919	44.3972	41.5125	46.366	40.3863	48.8568	44.6302	45.9782						557	0	0	0.141421	0	0.1	0	0	0	0	0
558	66.6453	51.964	33.2393	44.3972	41.5125	46.366	40.3122	48.8568	44.7262	45.9782						558	0	0	0.282843	0	0	0	0	0.1	0	0
559	66.6453	51.964	33.2393	44.3972	41.5125	46.366	40.1644	48.8568	44.8223	45.9782						559	0	0	0	0.3	0	0	0.1	0	0	0
560	66.6453	51.964	33.0635	44.3972	41.5125	46.2135	40.3122	48.8568	44.8223	45.9782						560	0	0	0	0	0	0	0.509902	0.1	0.1	0
561	66.6453	51.964	32.8486	44.3972	41.5125	46.2135	40.2382	48.8568	44.8223	45.9782						561	0	0	0	0	0	0	0	0	0	0
562	66.6453	51.964	32.8971	44.3972	41.4488	46.2135	40.3863	48.8568	44.8503	45.9782						562	0	0	0	0	0.1	0.1	0	0	0	0
563	66.6453	51.964	32.4119	44.3972	41.4488	46.2135	40.3863	48.8568	44.8785	45.9782						563	0	0	0	0	0.2	0	0	0	0	0
564	66.6453	51.964	32.4119	44.3972	41.4488	46.2023	40.3863	48.8568	44.8785	45.9782						564	0	0	0	0	0	0	0	0	0	0
565	66.6453	51.964	32.7926	44.1957	41.4627	46.2023	39.8884	48.8568	45.0703	45.9354						565	0	0	0	0	0	0	0	0	0	0
566	66.6453	51.964	32.9938	43.9819	41.1481	46.2674	40.171	48.8568	45.1663	45.9354						566	0.372864	0	0.509902	0	0.141421	0	0	0	0.2	0
567	66.6453	51.964	33.0619	43.7944	41.1799	46.2674	40.2382	48.8568	45.1663	45.9354						567	0	0	0.141421	0	0	0	0	0	0	0
568	66.6453	51.964	33.3188	43.464	41.1966	46.2674	40.1111	49.0531	45.1663	45.9354						568	0.155721	0	0	0	0	0	0	0	0.1	0
569	66.6453	51.964	33.3188	43.7582	41.354	46.2674	40.097	48.9549	45.1663	45.9354						569	0	0	0	0	0	0	0	0	0	0
570	66.6453	51.964	33.3188	43.895	41.4329	46.2674	39.762	48.9154	45.1663	45.8023						570	0	0	0.1	0	0.223607	0	0	0.1	0	0
571	66.6453	51.964	33.3188	44.1686	41.4329	46.2674	39.9862	49.0333	45.0703	45.845						571	0	0	0.223607	0	0	0	0	0	0	0
572	66.6453	52.0573	33.3777	44.2193	41.4329	46.2674	40.2602	49.0333	45.1663	45.845						572	0	0	0	0	0	0	0.223607	0.424264	0.141421	0
573	66.6453	52.0573	33.3777	44.414	41.4329	46.2674	40.2602	49.0333	45.1663	45.845						573	0	0	0	0.1	0	0	0.1	0.1	0.1	0
574	66.6453	52.0573	33.3777	44.414	41.2494	46.2674	40.1111	49.0333	45.1663	45.845						574	0	0	0	0.141421	0	0	0.1	0.1	0.223607	0
575	66.6453	52.0573	33.3777	44.414	41.2494	46.2674	39.9626	49.0134	45.1663	45.845						575	0	0	0	0.1	0	0	0.223607	0	0	0
576	66.6453	52.0573	33.2956	44.5141	41.2073	46.2674	40.3268	48.8957	45.1663	45.845						576	0	0	0	0.1	0	0	0	0	0.1	0
577	66.6453	52.0573	33.0546	44.5286	41.2073	46.2674	39.8213	48.8761	45.1663	45.845						577	0	0	0	0	0	0	0	0.1	0	0
578	66.6453	52.0573	33.0546	44.5286	41.287	46.2674	39.7472	48.8761	45.1663	45.845						578	0	0	0	0	0	0	0	0	0.1	0
579	66.6453	52.0573	32.9253	44.6148	41.4465	46.2674	39.7472	48.8761	45.1663	45.845						579	0	0	0.3	0	0	0	0	0.1	0	0
580	66.6453	52.0573	32.8155	44.6148	41.5264	46.2674	39.7472	48.8761	45.1663	45.845						580	0	0	0.5	0	0	0	0	0	0	0
581	66.6453	52.0573	32.8007	44.6148	41.6064	46.2674	39.7472	48.8761	45.1663	45.845						581	0	0	0	0	0	0	0	0	0.1	0.1
582	66.6453	52.0573	32.8309	44.6148	41.6064	46.2674	39.7472	48.7781	45.1663	45.845						582	0	0	0	0	0	0	0	0	0.1	0
583	66.6453	52.0573	32.8309	44.464	41.6064	46.2674	39.6801	48.7781	45.1663	45.845						583	0	0	0	0	0	0	0	0	0	0.1
584	66.6453	52.0573	32.8309	44.464	41.6064	46.2674	39.2719	48.8761	45.2622	45.845						584	0	0	0	0	0	0	0	0.1	0	0
585	66.6453	52.0573	32.8309	44.464	41.6064	46.2674	39.2719	48.8761	45.2622	45.845						585	0	0	0	0	0	0	0.1	0.223607	0	0
586	66.6453	52.0573	32.8309	44.464	41.5465	46.2023	39.2719	48.8761	45.2622	45.845						586	0	0	0	0	0	0	0	0.1	0.2	0.223607
587	66.6453	52.0573	32.8309	44.464	41.4272	46.2023	39.2719	48.8761	45.2622	45.845						587	0	0	0	0.1	0	0	0	0	0.1	0
588	66.6453	52.0573	32.8309	44.464	41.4272	46.2023	39.2719	48.8761	45.2622	45.845						588	0	0	0	0	0.223607	0	0	0	0	0
589	66.6453	52.0573	32.8309	44.464	41.4272	46.2023	39.2719	48.8761	45.2622	45.845						589	0	0	0	0	0	0	0.1	0	0	0
590	66.6453	52.0573	33.2847	44.464	41.4066	46.2023	39.2719	48.8761	45.0703	45.845						590	0	0	0	0	0	0	0	0.2	0	0
591	66.6453	52.0573	33.2683	44.464	41.4066	46.2023	39.2719	48.8761	45.0703	45.845						591	0	0	0	0	0	0	0.1	0.141421	0.1	0
592	67.0346	52.0573	33.2683	44.464	41.4066	46.2023	39.2719	48.8761	44.9744	45.845						592	0	0.360555	0	0	0.1	0	0	0.1	0.1	0
593	67.0346	52.0573	33.2683	44.464	41.4066	46.2023	39.2719	48.8761	44.9744	45.845						593	0	0	0	0	0.141421	0.360555	0	0	0.1	0
594	67.0346	52.0573	33.1901	44.464	41.207	46.2023	39.2719	48.7781	44.9744	45.845						594	0	0	0	0	0.1	0.1	0	0.1	0	0
595	67.0346	52.0573	33.0967	44.464	41.207	46.2023	39.2719	48.7781	44.9744	45.845						595	0	0.1	0	0	0	0	0	0	0	0
596	67.0346	52.0573	33.0967	44.464	41.207	46.2023	39.4878	48.5435	44.8503	45.845						596	0	0.1	0	0	0	0	0	0	0.1	0.3
597	67.0346	52.0573	33.0967	44.5506	41.207	46.2023	39.4131	48.6415	44.8223	45.845						597	0	0.989949	0	0	0	0	0	0	0	0
598	67.0346	52.0573	33.0967	44.5875	41.207	46.2023	39.4878	48.7394	44.9867	45.845						598	0	0.360555	0	0.1	0	0	0	0	0.1	0.282843
599	67.0346	52.0573	33.0967	44.6373	41.207	46.2023	39.6954	48.7394	44.9867	45.845						599	0	0.1	0	0.1	0	0	0	0	0	0
600	67.0346	52.0573	33.0967	44.6872	41.207	46.2023	39.6954	48.7394	45.0828	45.845						600	0	0.2	0.1	0	0	0	0.223607	2.43516	0	0
601	67.0346	52.0573	33.0967	44.6872	41.207	46.2023	39.6954	48.8374	45.0828	45.845						601	0	0.282843	0	0	0	0.1	0.1	0.72111	0	0
602	67.0346	52.0573	33.0967	44.6872	41.207	46.2023	39.6954	48.8374	45.179	45.845						602	0	0.424264	0.5	0	0	0.1	0.2	0.1	0	0
603	64.3328	51.6702	34.7053	45.3064	41.523	46.5188	40.093	48.2561	44.4103	45.6909						603	0	0	0.316228	0	0.2	0	0	1.23693	0	0
604	64.3328	51.6702	34.7053	45.3064	41.7104	46.5188	40.093	48.1584	44.4103	45.6909						604	0	0	0.1	0	0	0	0.1	0.141421	0	0
605	64.3328	51.6702	34.7053	45.3064	41.7104	46.4671	40.0148	48.2138	44.4103	45.6909						605	0.162619	0	0	0.2	0.1	0	0	0.447214	0	0
606	64.3328	51.6702	34.7053	45.3064	41.7104	46.4671	40.0148	48.116	44.4103	45.6909						606	0.176171	0	0	0	0	0	0	0.1	0	0
607	64.3328	51.6702	34.7053	45.3064	41.7104	46.4671	40.0148	48.2138	44.4103	45.6909						607	0.176171	0	0	0	0.223607	0	0	0.1	0	0
608	64.3328	51.6702	34.7053	45.3064	41.7104	46.4671	39.9368	48.2138	44.3548	45.6909						608	0.590912	0	0	0	0	0	0	0	0	0.2
609	64.3328	51.6702	34.7053	45.275	41.523	46.4671	39.9368	48.1518	44.2312	45.6909						609	0	0	0	0	0.141421	0	0	0	0	0
610	64.3328	51.6702	34.7053	45.275	41.523	46.4671	39.9368	48.1518	44.2312	45.6909						610	0.351341	0	0	0.1	0	0	0	0	0	0.1
611	64.3328	51.6702	34.7053	45.3284	41.523	46.4671	39.9368	48.2295	44.1077	45.6909						611	0	0	0	0	0	0	0.141421	0	0	0
612	64.3328	51.6702	34.7053	45.3284	41.523	46.4671	39.9368	48.2295	44.0115	45.6909						612	0	0	0	0	0	0	0.1	0	0	0.2
613	64.3328	51.6702	34.7053	45.3284	41.523	46.4671	39.9368	48.2295	44.1077	45.6909						613	0	0	0	0	0.2	0	0	0.1	0	0
614	64.3328	51.6702	34.7053	45.3284	41.6478	46.4671	39.9368	48.2295	44.0115	45.6909						614	0	0	0	0	0	0	0	0.3	0	0
615	64.3328	51.6702	34.7053	45.3284	41.6478	46.4671	39.9368	48.1316	44.0115	45.6909						615	0	0	0	0	0.1	0	0	0.2	0	0.223607
616	64.3328	51.6702	34.7053	45.3284	41.6478	46.4671	39.9368	48.1316	44.0115	45.6909						616	0.644956	0	0	0	0	0	0	0	0	0
617	64.3328	51.6702	34.6095	45.3819	41.6478	46.4671	39.9368	48.2295	44.0115	45.6909						617	0	0	0.223607	0	0	0	0	0	0	0
618	64.2777	51.6702	34.6095	45.3819	41.6478	46.4671	39.9368	48.1316	44.0115	45.6909						618	0	0	0.360555	0	0	0	0	0	0	0.1
619	64.2777	51.6702	34.6095	45.3819	41.6478	46.4671	39.9368	48.1316	44.0115	45.6909						619	0	0	0	0	0	0.223607	0	0	0	0.2
620	64.2777	51.6702	34.6095	45.3755	41.6478	46.4671	39.9368	48.1316	44.0115	45.6909						620	0	0	0	0	0	0.223607	0	0	0	0
621	64.2777	51.6702	34.8326	45.3755	41.7732	46.4671	39.9368	47.6089	44.0115	45.6909						621	0	0	0.316228	0	0	0.141421	0	0.316228	0.2	0.1
622	64.2777	51.6702	34.8775	45.3755	41.7732	46.4671	39.8589	47.4928	44.0115	45.6909						622	0	0	0.223607	0	0.2	0.1	0	0	0	0.360555
623	64.2777	51.6702	34.8775	45.2077	41.7104	46.4671	39.8589	47.2265	44.0115	45.6909						623	0	0	0	0	0	0	0	0.1	0.316228	0
624	64.2777	51.6702	34.8775	45.2077	41.7104	46.4671	39.8589	47.2097	44.0115	45.6909						624	0	0	0	0	0	0	0.2	0	0.141421	0.141421
625	64.2777	51.6702	34.8775	45.2077	41.4919	46.4671	39.8589	47.193	44.0115	45.6909						625	0	0	0	0	0	0	0	0	0.3	0
626	64.2777	51.6702	34.8775	45.2077	41.4919	46.4671	39.8589	47.193	44.0115	45.8733						626	0	0	0	0	0	0	0	0	0.3	0
627	64.2777	51.6702	34.8775	45.2077	41.5072	46.4671	39.8589	47.193	44.0115	45.8733						627	0.176171	0	0	0	0	0	0.2	0	0.2	0
628	64.2777	51.6702	34.8775	45.1533	41.5072	46.4671	39.8589	47.193	44.0115	45.9645						628	0	0	0	0	0	0.1	0.1	0	0.509902	0
629	64.2777	51.6702	34.8775	45.1533	41.5072	46.4671	39.8743	47.193	44.0115	45.9645						629	0	0	0	0.141421	0	0.2	0	0	0	0
630	64.2777	51.6702	34.8775	45.1533	41.5072	46.4671	39.7962	47.193	44.0115	46.0467						630	5.29942	0	0	0	0	0	0	0.1	0.223607	0
631	64.2777	51.6702	34.8775	45.1533	41.6325	46.4671	39.7962	47.2917	44.0115	46.0467						631	0.176171	0	0	0	0	0	0	0	0.447214	0.223607
632	64.2777	51.6702	34.8775	45.1533	41.6325	46.4671	39.7962	46.9958	44.0115	46.0467						632	2.57441	0	0	0	0.2	0	0.3	0	0.282843	0
633	64.2777	51.6702	34.8775	45.1533	41.5698	46.4671	39.7962	47.193	44.0115	46.2205						633	0	0	0	0	0	0.1	0	0	0.223607	0
634	64.0552	51.6702	34.8775	45.1533	41.5698	46.4671	39.7962	47.193	44.0115	46.2205						634	0	0	0	0	0	0	0	0	0.1	0.2
635	64.3584	51.6702	35.0115	45.1533	41.5698	46.4671	39.7962	47.193	44.0115	46.2205						635	0.176171	0	0	0	0	0	0	0	0.360555	0.1
636	64.3584	51.6702	34.968	45.1533	41.5698	46.4671	39.7962	47.193	44.0115	46.3115						636	0	0	0	0	0	0	0	0	0.3	0
637	64.3584	51.6702	34.968	45.1533	41.5698	46.2624	39.7962	47.193	44.0115	46.4936						637	0	0	0	0	0	0	0	0	0.141421	0
638	63.3209	51.6702	34.968	45.1533	41.5698	46.3137	39.7962	47.193	44.0115	46.4936						638	0.311441	0	0	0	0	0	0.1	0	0.141421	0
639	63.3209	51.6702	34.922	45.1533	41.5698	46.3263	39.7962	47.3421	43.8191	46.4025						639	0.235128	0	0	0	0	0	0.360555	0	0.1	0
640	62.839	51.6702	34.7435	45.1533	41.4448	46.4032	39.7962	47.3421	43.8191	46.0967						640	0.358891	0	0.360555	0	0	0.1	0	0	0.2	0
641	62.839	51.6702	34.7435	45.1533	41.4448	46.4032	39.7962	47.4406	43.5032	46.0967						641	0.372864	0	0	0	0	0.1	0	0	0.1	0
642	62.839	51.6702	34.7435	45.1533	41.4448	46.4032	39.9524	47.4406	43.3797	46.229						642	0	0	0	0	0	0	0	0	0.1	0.1
643	62.839	51.6702	34.7435	45.1533	41.4448	46.4032	39.9524	47.4406	43.6685	46.229						643	0.461026	0	0	0	0	0	0	0	0.2	0
644	62.839	51.6702	34.7435	45.1533	41.4448	46.4032	39.9524	47.4406	43.3797	46.229						644	0	0.583095	0	0	0	0	0	0.1	0	0
645	62.839	51.6702	34.7435	45.1533	41.4448	46.4032	39.7962	47.4406	43.1873	46.229						645	0.176171	0	0	0	0	0	0	0.4	0.223607	0
646	62.839	51.6702	34.7435	45.1533	41.4448	46.4671	39.8743	47.4406	43.6956	46.229						646	0	0	0	0	0	0	0	0	0.3	0
647	62.5355	51.6702	34.7435	45.1831	41.4448	46.5954	39.8743	47.4406	43.6956	46.229						647	0	0	0	0.282843	0	0.1	0	0	0	0
648	62.7186	51.6702	34.7435	45.1831	41.4448	46.5954	39.8743	47.5391	43.7379	46.229						648	0	0	0	0	0	0	0	0	0	0
649	63.1009	51.6702	34.7435	45.1831	41.4448	46.5954	39.8743	47.5391	43.2991	46.0558						649	0.646152	0	0.1	0	0	0	0	0.1	0	0
650	63.1009	51.6702	34.7435	45.1831	41.5698	46.5954	40.109	47.5391	43.0534	46.0558						650	0.156956	0	0.141421	0	0	0.1	0	0	0	0
651	63.1009	51.6702	34.7435	45.1831	41.5698	46.5312	40.109	47.5391	42.8869	46.0558						651	0	0	0	0	0	0	0	0	0	0
652	63.1009	51.6702	34.7435	45.1831	41.5698	46.5312	40.109	47.5391	42.9833	46.2385						652	0	0	0	0	0	0	0	0	0	0
653	63.1009	51.6702	34.7435	45.1831	41.5698	46.5312	40.109	47.5391	43.3258	46.1471						653	0.51496	0	0	0	0	0	0	0	0	0
654	63.1009	51.6702	34.7435	45.1831	41.5698	46.5312	40.109	47.5391	43.6149	46.1471						654	0.155721	0	1.45602	3.36155	0	0	0	0	0	0
655	63.1009	51.6702	34.7435	45.1831	41.5698	46.5312	40.109	47.5391	43.7379	46.1471						655	0	0	0.1	0.282843	0	0	0	0.1	0	0
656	63.1009	51.6702	34.7435	45.1831	41.5698	46.5312	40.0307	47.5391	43.6149	46.1471						656	0	0	0	0.141421	0	0	0	0.1	0	0
657	63.1009	51.6702	34.7435	45.1831	41.5698	46.5312	39.9217	47.5391	43.5185	46.1471						657	0	0	0.5	0	0	0.141421	0	0.2	0	0
658	63.1009	51.6702	34.7916	45.1831	41.5698	46.5954	39.9217	47.5391	43.7113	46.1471						658	0.677579	0	0.2	0	0	0	0	0	0	0
659	63.1009	51.6702	34.7916	45.1831	41.5698	46.5312	39.9217	47.5391	43.6849	46.1471						659	0.235128	0	1.52971	0	0	0	0	0	0	0
660	63.8563	51.4469	49.3231	47.213	41.8328	46.4193	38.5992	46.3025	43.1257	46.3613						660	0	0	0	0.2	0	0	0	0.1	0	0
661	63.8563	51.4469	49.3231	47.213	41.8328	46.4193	38.5992	46.3025	43.0301	46.3613						661	0	0	0	0	0.1	0	0	0	0.1	0
662	63.8563	51.4469	49.3231	47.213	42.4493	46.4193	38.5992	46.3025	42.9052	46.444						662	0.525401	0	0.360555	0	0	0	0	0.1	0	0.223607
663	63.8563	51.4469	49.3231	47.213	42.4419	46.4193	38.5992	46.3025	42.9052	46.444						663	0	0	0.3	0	0.2	0	0	0.424264	0	0.2
664	63.8563	51.4469	49.3231	47.213	42.4419	46.4193	38.5992	46.3025	42.8096	46.444						664	0	0	0	0	0	0	0.1	0	0	0.2
665	63.8563	51.4469	49.3231	47.213	42.3006	46.4193	38.5992	46.6136	43.0009	46.346						665	0	0	0	0	0	0	0	0	0	0.1
666	63.8563	51.4469	49.3231	47.213	42.3006	46.4193	38.5992	46.6136	43.4796	46.2622						666	0	0	0	0	0	0	0	0	0.6	0.1
667	63.8563	51.4469	49.3231	47.213	42.3006	46.4193	38.5992	46.6136	43.6331	46.2622						667	0	0	0.360555	0	0	0	0	0.1	0	0.1
668	63.8563	51.4469	49.3231	47.213	43.32	46.4193	38.5992	46.6136	43.6041	46.2132						668	0.338789	0.5	0.1	0	0	0	0	0.1	0	0.223607
669	63.8563	51.4469	49.3231	47.213	43.2512	46.4193	38.5992	46.6136	43.5754	45.8831						669	0	0.1	0	0	0.223607	0	0.316228	0	0	0.1
670	64.6388	51.4469	49.5284	47.213	43.5272	46.4193	38.5992	46.6136	43.5754	46.0558						670	0	0	0	0	0	0	0.141421	0.3	0	0
671	64.3108	51.3757	49.7282	47.213	43.5272	46.4193	38.5992	46.5146	43.317	46.2089						671	0	0	0	0	0	0	0	0	0	0.316228
672	64.4313	51.4693	49.7282	47.213	43.5272	46.4193	38.5992	46.2035	43.317	46.1173						672	0	0	0	0	0	0	0	0	0	0.223607
673	64.3307	51.4693	49.7282	47.213	43.5272	46.4193	38.5992	46.2035	43.317	46.0026						673	0	0	0	0	0.223607	0.141421	0	0	0	0.141421
674	64.3307	51.4693	49.7282	47.213	43.5272	46.4193	38.941	46.0055	43.317	45.9102						674	0	0	0	0	0.1	0.141421	0	0	0	0.1
675	64.3307	51.4693	49.7282	47.213	43.5272	46.4193	38.941	46.1045	43.317	45.9102						675	0.696118	0	0	1.21655	0	0	0	0	0	0.1
676	65.0377	51.4693	49.7282	47.213	43.5272	46.4193	38.941	46.0055	43.317	45.9102						676	0	0	0	0.282843	0	0	0	0.1	0	0
677	65.159	51.4693	49.6448	47.213	43.0411	46.4193	39.2832	46.1045	43.317	45.9102						677	0	0	0	0.223607	0	0	0	0	0	0
678	65.9489	51.4693	49.6448	47.3279	43.0411	46.4193	39.2832	46.0055	43.317	45.9102						678	0	0	0	0	0	0	0	0.412311	0	0
679	65.8279	51.4693	49.6448	47.3279	43.1139	46.4193	39.2832	46.0055	43.2214	45.9102						679	0	0	0	0	0	0	0	0.5	1.04403	0
680	65.8279	51.4693	49.8896	47.3279	43.1139	46.4193	39.2832	46.1045	43.2214	45.7417						680	0	0	0	0.223607	0	0	0	0.141421	0.360555	0.538516
681	65.8279	51.4693	49.9386	47.3279	43.2512	46.4193	39.2832	45.7659	43.2214	45.6664						681	0	0	0	0	0	0	0	0.1	0	0.1
682	65.7853	51.4693	49.9386	47.3279	43.2512	46.4193	39.362	45.7659	43.2214	45.5919						682	0	0	0	0	0	0	0.2	0	1.40357	0
683	65.6649	51.4693	49.9386	47.3279	43.2512	46.4193	39.362	45.7659	43.2214	45.555						683	0	0	0	0	0	0	0	0.1	0	0.1
684	65.6649	51.4693	49.9386	47.3279	43.2512	46.4193	39.362	45.7659	43.0503	45.5182						684	0	0	0	0	0	0	0	0	1.58114	0
685	65.6649	51.4693	49.7923	47.3279	43.2512	46.4193	39.362	45.6668	43.0503	45.4816						685	0	0	0	0	0	0	0	0	0.538516	0.1
686	65.6649	51.0019	49.6938	47.3279	43.2512	46.4193	39.362	45.5678	43.0503	45.5022						686	0	0	0	0	0	0	0	0	0.141421	0
687	65.6649	51.0953	49.6938	47.3279	43.1868	46.4193	39.0641	45.5678	43.0503	45.5955						687	0	0	0	0	0	0	0.509902	0	0	0
688	65.4392	51.0953	49.6938	47.3279	43.1868	46.4193	38.9237	45.865	43.0503	45.5955						688	0	0	0	0	0.360555	0	0.1	0	0	0.1
689	65.4392	51.0953	49.6938	47.3279	43.1868	46.4193	38.9237	45.865	43.0503	45.582						689	0	0	0.2	0	0.282843	0	0	0	0	0.1
690	65.4392	51.0953	49.6938	47.3279	43.1868	46.4193	38.9237	45.865	43.0503	45.4181						690	3.08021	0	0.2	0	0	0	0	0	0	0.1
691	65.4392	51.0953	49.6938	47.3279	43.1234	46.5603	38.9237	45.865	43.0503	45.4769						691	0	0	0	0.2	0.1	0.2	0.1	0	0	0
692	65.4392	51.0953	49.6938	47.3279	43.1915	46.5716	38.9237	45.865	43.0503	45.4423						692	2.25777	0	0	0	0	0.1	0	0	0	0
693	65.4392	51.0953	49.6938	46.4816	43.1915	46.5716	38.9237	45.865	43.0503	45.4769						693	0	0	0	0	0	0	0	0.316228	0	0.141421
694	65.4392	51.0953	49.6938	46.2039	43.1915	46.5716	38.9237	45.7659	43.0503	45.4769						694	3.53954	0.3	0	0	0	0	1.1	0	0.316228	0.1
695	65.4392	51.0953	49.6938	46.0093	43.1915	46.5716	38.9237	45.7659	43.0503	45.4769						695	0.176171	0	0	0	0	0	0.2	0.583095	0	0
696	65.4392	51.0953	49.6938	46.0093	43.1915	46.5716	38.9237	45.6142	43.0503	45.4769						696	0	0	0	0	0	0	0	0.223607	0	0
697	65.4392	51.0953	49.6938	46.0093	43.1915	46.5716	38.9237	45.9742	43.6259	45.4769						697	0	0	0	0	0	0	0.360555	0.141421	0	0
698	65.4392	51.0953	49.6938	46.2039	43.1915	46.5716	38.9237	45.863	43.5258	45.4939						698	0	0	0	0	0	0	0.141421	0	0.1	0
699	65.4392	51.0953	49.6938	46.2039	43.1915	46.5716	38.9237	45.9623	43.5258	45.4604						699	0	0	0	0	0	0	0.141421	0	0.1	0
700	65.4392	51.0953	49.6938	46.2039	43.1915	46.5716	38.7664	45.9623	44.0681	45.4604						700	0	0	0	0	0	0	0.3	0.223607	0	0
701	65.2233	51.0953	49.6938	46.2039	43.1915	46.5716	38.7664	45.9507	44.0681	45.4271						701	0	0	0	0	0	0	0.1	0	0	0
702	65.2233	51.0953	49.6938	46.2039	43.1915	46.5716	38.7664	45.9507	45.3596	45.4271						702	0	0	0	0.3	0	0	0	0	0	0.141421
703	65.2233	51.0953	49.6938	46.2039	43.1915	46.5716	38.7664	45.9507	45.7248	45.3939						703	0	0	0	0	0	0	0	0	0	0
704	65.2233	51.0953	49.6938	46.2039	43.1915	46.5716	38.7664	45.9507	45.5955	45.3939						704	0	0	0	0	0.141421	0	0.141421	0	0	0
705	65.2233	51.0953	49.6938	46.2039	43.1915	46.5716	39.0001	45.9507	45.5955	45.3939						705	0	0	0	0	0.1	0	0.1	0	0.8544	0
706	65.2233	51.0953	49.6938	46.2039	43.2512	46.5716	39.078	45.9507	45.5955	45.2996						706	0	0.608276	0	0	0.4	0	0	0	0.5	0
707	65.2233	51.0953	49.8908	46.2039	43.2598	46.5716	39.078	45.9507	45.5955	45.3328						707	0	0	0	0	0.141421	0	0	0	0	0.3
708	65.2233	51.0953	49.6938	46.2039	43.2598	46.5716	39.078	45.9507	45.5955	45.2996						708	1.98692	0	0	0	0.894427	0	0.1	0	0	0.1
709	65.2233	51.0953	49.6938	46.3161	43.1915	46.4424	39.0001	45.9507	45.5955	45.2996						709	0.155721	0	0	0	1.56205	0	0	0	0	0
710	65.12	51.0953	49.6938	46.3161	43.1915	46.5069	39.0001	45.9507	45.5955	45.2996						710	0	0	0	0	0.1	0	0	0.1	0	0
711	65.12	51.0953	49.6938	46.3161	43.1915	46.5069	39.0001	45.6412	45.5955	45.2385						711	0	0	0	0	0	0	0	0	0	0
712	65.12	51.3757	49.6938	46.3161	43.1915	46.5069	38.1505	45.6412	45.395	45.1442						712	2.90422	0	0	0.3	0.1	0	0.608276	0.1	0	0
713	65.12	51.3757	49.6938	46.3161	43.1915	46.5069	37.9974	45.1109	45.395	45.1442						713	0	0	0	0.7	0.1	0	0	0.1	0	0
714	65.12	51.3757	49.6938	46.3161	43.1915	46.5069	37.9974	45.0337	45.395	45.1442						714	3.4604	0	0	0.7	0.2	0	0.2	0	0.824621	0
715	65.12	51.3757	49.6938	46.3161	43.1915	46.5069	37.8986	45.1445	45.395	45.1442						715	0	0	0	0	0.141421	0	0	0	0.2	0
716	65.12	51.3757	49.6938	46.3161	43.1915	46.5069	37.8882	45.1445	45.4885	45.1442						716	0.823717	0	0	0.282843	0.1	0	0	0	0	0
717	65.12	51.3757	49.6938	46.3161	43.1915	46.5069	37.8784	45.1445	45.395	45.1442						717	0.358891	0	0	0	0	0	0	0.509902	0	0
718	65.12	51.3757	49.6938	46.3161	43.1915	46.5069	37.6528	45.2672	45.395	45.1442						718	1.2078	0	0	0	0	0	0	0.5	0	0
719	65.12	51.3757	49.6938	46.3161	43.1915	46.5069	37.5778	45.2672	45.395	45.1442						719	0.468274	0	0	0	0.2	0	0	0	0.1	0
720	65.12	51.3757	49.6938	46.4854	43.1915	46.5069	37.5778	45.2672	45.395	45.0836						720	0.156215	0	0	0	0	0.1	0.1	0	0.316228	0
721	65.12	51.3757	49.6938	46.4854	43.1915	46.5069	37.5778	45.2672	45.395	45.0836						721	0.468274	0	0	0	0	0.1	0	0	0.1	0
722	65.12	51.3757	49.6938	46.4854	43.1968	46.5069	37.719	45.2672	45.395	45.0836						722	1.39215	0	0.608276	0	0	0	0	0	0	0
723	65.56	51.3757	49.6938	46.4854	43.1289	46.5069	37.6442	45.2672	45.4062	45.0836						723	2.77395	0	0	0	0	0.2	0	0	0	0
724	65.56	51.9023	49.6938	46.4854	43.4011	46.5069	37.6442	45.2672	45.1487	45.0836						724	0.460189	0	0	0	0	0	0.2	0	0.1	0
725	65.56	51.9023	49.6938	46.4854	43.3966	46.5069	37.6442	45.2672	45.1487	45.3662						725	0.471074	0	0	0	0	0	0	0	0	0
726	65.56	51.9023	49.6938	46.4854	43.6621	46.5069	37.719	45.2672	45.1487	45.3328						726	0	0	0	0	0	0	0	0.1	0	0
727	65.56	51.9023	49.6938	46.4854	43.8146	46.5069	37.719	45.2672	45.1487	45.3328						727	0.156956	0	0.3	0	0	0	0	0.2	0.1	0
728	65.56	51.9023	49.6938	46.4854	43.7458	46.5069	37.719	45.168	45.1487	45.3328						728	0	0	0	0.2	0	0	0	0.2	0.223607	0
729	65.3445	51.9023	49.6938	46.4854	43.7458	46.5069	37.719	45.168	45.1487	45.3328						729	0	0	0.141421	0	0	0	0.424264	0.1	0	0
730	65.3445	51.9023	49.6938	46.6561	43.8146	46.5069	38.2359	45.0687	45.1487	45.3328						730	0	0	0.1	0	0	0	0	0.1	0	0
731	65.3445	51.9023	49.6938	47.0594	43.7422	46.5069	38.2359	45.168	45.1487	45.3328						731	0	0.141421	0	0	0	0	0	0.360555	0	0
732	65.3445	51.9023	49.6938	47.4695	43.8871	46.5069	38.387	45.168	45.0362	45.3328						732	0	0	0	0	0	0	0	0.1	0	0.141421
733	65.3445	51.9023	49.6938	47.4695	43.8836	46.5069	38.387	45.168	45.2225	45.3328						733	0	0	0	0	0	0.1	0	0	0	0
734	65.3445	51.9023	49.6938	47.7491	43.9527	46.5069	38.387	45.168	45.2225	45.3328						734	0.311441	0	0	0	0	0	0	0.1	0	0
735	65.3445	51.9023	49.6938	47.7491	43.9527	46.5069	38.387	45.1313	45.2225	45.3328						735	0	0	0	0	0	0	0	0.316228	0	0
736	65.3131	51.9023	49.6938	47.7491	43.9527	46.5069	38.387	44.7753	45.2225	45.3328						736	0	0	0	0.223607	0	0	0	0.2	0.2	0
737	65.3131	51.9023	49.6938	47.7491	43.8085	46.5069	38.387	44.7753	45.1293	45.3328						737	0	0	0	0.1	0	0	0	0	0	0
738	65.3131	51.9023	49.6938	47.7491	43.8085	46.5716	38.4627	44.7753	45.1463	45.3328						738	0	0	0	0	0	0	0	0	0	0
739	65.3131	51.9023	49.6938	47.7491	43.8085	46.6364	38.4627	44.7753	45.2392	45.3328						739	0	0	0	0	0	0	0.2	0.1	0	0
740	65.3131	51.9023	49.4948	47.7491	43.8085	46.6364	38.4627	44.7753	45.2392	45.3328						740	0	0	0	0	0	0	0.1	0.1	0.1	0.141421
741	65.3131	51.9023	49.4948	47.7491	43.8085	46.7888	38.4627	44.7753	45.2392	45.3328						741	0	0	0.1	0	0	0	0	0	0	0
742	65.3131	51.9023	49.4948	47.7491	43.8085	46.7888	38.6145	44.7753	45.1463	45.3328						742	0	0	0.1	0.223607	0	0	0	0	0	0.2
743	65.3131	51.9023	49.4948	47.7491	43.8085	46.7888	38.6145	44.7753	45.1463	45.3328						743	0	0	0	0.1	0	0	0	0.4	0	0
744	65.3131	51.9023	49.4948	47.7491	43.8085	46.7888	38.6145	44.7893	45.1463	45.3328						744	0	0	0.1	0	0	0	0	0.2	0	0
745	65.3131	51.9023	49.4472	47.7491	43.8085	46.7888	38.6145	44.9873	45.0534	45.3328						745	0	0	0.2	0.1	0	0	0	0	0	0
746	65.3131	51.9023	49.4472	47.8676	43.8085	46.7888	38.6145	44.7893	45.0352	45.3328						746	0	0	0.2	0	0	0	0	0	0	0
747	65.3131	51.9023	49.3641	47.8676	43.8085	46.7888	39.0375	44.8883	45.0352	45.3328						747	0	0	0	0	0	0	0	0	0	0
748	65.3131	51.9023	49.2654	47.8676	43.8085	46.7888	39.0375	44.7893	45.0352	45.3328						748	0	0	0	0	0	0	0.1	0	0	0
749	65.3131	51.8436	49.2654	47.8676	43.8085	46.7888	39.0375	45.1147	45.0352	45.3328						749	1.13143	0	0	0	0.1	0	0	0	0	0
750	65.3131	51.8436	49.2654	47.8676	43.8085	46.7888	39.0375	45.2137	45.0352	45.272						750	0	0	0	0	0	0	0	0.2	0	0
751	63.2552	51.8436	49.2654	47.8676	43.8085	46.8535	39.0375	45.2137	45.0352	45.272						751	0	0	0	0.223607	0	0	0	0.3	0	0.1
752	63.2552	51.8436	49.2654	47.8676	43.8085	46.8535	39.0375	45.3126	45.0352	45.272						752	0	0	0.412311	0	0	0	0	0.1	0	0
753	62.1568	51.8436	49.2654	47.8676	43.8085	46.8535	39.0375	45.0014	45.0352	45.272						753	0	0	0.141421	0	0	0	0.9	0.1	0	0
754	62.1568	51.8436	49.2654	47.6685	43.8085	46.8535	39.0375	45.1994	44.8499	45.272						754	0	0	0	0	0	0	0	0	0	0
755	62.1844	51.8436	49.2654	47.6093	43.8085	46.8535	39.0375	45.1994	44.8499	45.272						755	0	0	0	0	0	0	0	0	0	0
756	62.0889	51.8436	49.2654	47.6093	43.8085	46.8535	39.0375	45.1994	44.8499	45.272						756	0	0.1	0	0	0	0	0.2	0	0	0
757	62.0889	51.8436	49.2654	47.6093	43.8085	46.8535	38.8858	45.1004	44.8499	45.272						757	0	0	0	0	0	0	0	0.2	0	0
758	62.0889	51.8436	49.2654	47.6093	43.8085	46.8535	38.9616	45.1994	44.9425	45.2115						758	0	0	0.141421	0	0	0	0	0	0	0
759	62.0889	51.8436	49.1667	47.6093	43.8085	46.8535	38.9616	45.1994	44.9425	45.2115						759	0	0	0.141421	0	0	0	0	0.360555	0	0
760	62.0889	51.8436	49.1826	47.7119	43.8085	46.8535	38.9616	45.1994	44.9425	45.2796						760	0	0	0	0	0	0	0	0	0	0
761	62.0889	51.8436	49.1826	47.6532	43.8085	46.8535	38.9616	44.8035	44.9425	45.2796						761	0	0	0	0	0	0	0.1	0	0	0
762	62.0889	51.8436	49.1988	47.6532	43.8085	46.8535	38.9616	45.0014	44.9425	45.2796						762	0	0	0	0	0	0	0	0.1	0.1	0
763	62.0889	51.8436	49.0015	47.5722	43.8085	46.8535	38.9616	45.0014	44.9425	45.2796						763	0	0	0.141421	0	0	0	0.1	0.1	0	0.1
764	62.0889	51.8436	48.8041	47.5722	43.8085	46.8535	38.9616	45.0014	44.9425	45.2796						764	3.09374	0	1.00499	0	0	0	0	0.1	0	0
765	62.0889	51.8436	48.8041	47.5722	43.8085	46.8535	38.9616	45.0014	44.9425	45.2796						765	0	0	0.761577	0	0	0	0	0	0	0
766	62.0889	51.8436	48.8041	47.5722	43.8085	46.8535	39.0375	45.0014	44.9425	45.2796						766	1.37768	0	0.1	0	0	0	0	0	0	0
767	62.0889	51.8436	48.8041	47.5722	43.8806	46.8535	39.0375	45.0014	44.9425	45.2796						767	0	0.9	0.7	0.447214	0	0	0	0	0	0
768	62.0889	51.8436	48.8041	47.5722	43.8806	46.8535	39.0375	44.8035	44.9425	45.2796						768	0	0.3	0.5	0.1	0	0	0	0	0	0
769	62.3347	51.8436	48.8041	47.4695	43.8806	46.8535	39.0375	45.1004	44.9425	45.1857						769	0	0.1	0.223607	0	0	0	1.20416	0	0	0
770	62.4682	51.8436	49.1826	47.4695	43.8806	46.8535	39.0375	45.1994	44.9425	45.1857						770	0	0	0.509902	0	0	0	0	0	0	0
771	62.4682	51.8436	49.1001	47.4695	43.8806	46.8535	39.7253	45.1853	44.9425	45.1857						771	0.867835	0	0	0	0	0	0	0.360555	0	0
772	62.4682	51.8436	49.1001	47.4695	43.8806	46.8535	39.7253	45.1853	44.9425	45.1857						772	0.51496	0	0.447214	0	0	0	0.5	0	0	0
773	61.1675	51.8436	49.1001	47.4695	43.8806	46.8535	39.7253	45.1853	44.9425	45.1857						773	0.155721	0	0	0	0	0	0.1	0.3	0	0
774	61.1675	51.8788	49.1001	47.4695	43.8806	46.8535	39.8792	45.1853	44.9425	45.1857						774	0	0	0	0	0	0.1	0	0	0	0
775	60.0321	51.8788	49.1001	47.4695	43.8806	46.8535	39.8792	44.9873	44.9425	45.1857						775	0	0	0.1	0	0	0	0	0	0	0
776	60.0321	51.8788	49.2151	47.4695	43.8806	46.8535	39.8792	44.9873	44.9425	45.1857						776	0.162619	0	0.1	0.447214	0	0	0	0.1	0	0.223607
777	60.1703	51.8788	49.1331	47.4695	43.8806	46.8535	39.8792	45.3126	44.9425	45.1857						777	0	0	0	0	0	0.1	0	0.1	0	0
778	60.382	51.8788	49.1331	47.4695	43.8806	46.8535	39.8792	45.3126	44.9425	45.1857						778	2.41183	0	0	0	0	0.141421	0	0	0	0
779	61.1722	51.8788	49.1331	47.4695	43.8806	46.8535	39.9564	45.3126	44.9425	45.1857						779	0.810093	0.806226	0.1	0	0	0	0.5	0	0	0
780	61.602	51.8788	49.1331	47.4695	43.8806	46.8535	39.9564	45.2137	44.8499	45.1857						780	0.80914	0	0.806226	0	0	0	0.72111	0.2	0	0
781	61.7455	51.8788	49.0179	47.4695	43.8806	46.8535	40.0336	45.1147	44.8499	45.2796						781	1.90924	0	0	0.223607	0	0	0.4	0.282843	0	0.5
782	62.1761	51.8788	48.9615	47.4695	43.8806	46.8535	40.0336	45.2137	44.8499	45.2796						782	0.781074	0	0.3	0	0	0	0.948683	0.360555	0.1	0.282843
783	62.6481	51.8788	49.3641	47.4695	43.8806	46.8535	40.0336	45.2137	44.8499	45.2796						783	1.26183	0	0.1	0.141421	0	0	0.2	0.1	0.316228	0.282843
784	64.0859	51.8788	49.2654	47.4695	43.8806	46.8535	40.0336	45.2137	44.8499	45.2796						784	1.51572	0	0	0.1	0	0	0.3	0.1	0	0
785	64.2661	51.5682	49.1594	47.3966	43.8806	46.8535	40.0336	45.2137	44.8499	45.2796						785	0	0.3	0	0	0	0	0.565685	0	0.806226	0.1
786	64.4459	51.4678	48.8061	47.455	43.8806	46.8535	40.0336	45.2137	44.8499	45.2796						786	3.26726	1.2	0.412311	0	0	0.583095	0.316228	0.2	0.141421	0.1
787	64.4459	51.3734	48.8781	47.455	43.8806	46.8535	38.8447	45.2137	44.8499	45.2796						787	0.155721	0.3	0	0.223607	0	0	0.824621	0.2	0	0.1
788	64.2975	51.3734	48.7149	47.455	43.8806	46.8535	38.8447	45.2137	44.8499	45.2796						788	1.28558	0.424264	0	0.223607	0	0	0.509902	0.316228	0	0
789	64.2975	51.3734	48.7149	47.455	43.8806	46.8535	38.8447	45.06	44.8499	45.2796						789	1.8902	0.223607	0	0	0	0	0.921954	0.141421	0	0
790	64.2975	51.3734	48.2936	47.455	43.8806	46.8535	38.9689	45.06	44.8499	45.2796						790	0.162619	0.2	0	0.223607	0.223607	0	1.11803	0	0.141421	0
791	64.2975	51.3734	48.2936	47.455	43.8806	46.8535	38.8906	45.1063	44.8499	45.2796						791	0	0.141421	0.4	0	0.1	0	0.8544	0	0.1	0.424264
792	64.2975	51.3734	48.2936	47.455	43.8806	46.9183	38.8906	45.1063	44.8499	45.2796						792	0.155721	0.72111	0	0	0	0	0.583095	0	0	0.360555
793	64.2975	51.3734	48.3928	47.455	43.8806	46.9183	38.8906	45.1063	44.8499	45.2796						793	0.312677	0.2	0	0	0	0	1.17047	0	0.141421	0
794	64.2975	51.3734	48.4921	47.3855	43.8806	46.9183	38.8906	45.0075	44.8499	45.2546						794	0	0	0.1	0	0	0	0	0.1	0.360555	0.921954
795	64.0031	51.3734	48.4921	47.3855	43.8806	46.9833	38.8906	45.1063	44.8499	45.2546						795	0	0.141421	0.412311	0	0	0	0	0.1	0.141421	0.921954
796	64.0031	51.3734	48.4921	47.3855	43.8806	46.9725	38.8906	45.1063	44.8499	45.2546						796	1.28107	0	0	0.1	0	0.1	0	0	0.1	0.223607
797	64.0031	51.2075	48.3928	47.3855	43.8806	46.9725	39.3904	45.1063	44.8499	45.2546						797	0.352437	0	0	0.141421	0	0	0.1	0	0	0.223607
798	64.0031	51.2075	48.4029	47.3855	43.8806	46.9725	39.337	45.0752	44.8499	45.2546						798	0.500496	0	0	0	0.1	0	0.282843	0.538516	0.1	0.223607
799	64.0031	51.2075	48.4029	47.4197	43.8806	46.9725	39.6554	44.8473	44.8499	45.1146						799	0.798285	0	0	0	0.1	0	0.67082	0.824621	0	0.1
800	64.0031	51.2075	48.4349	47.4197	43.8806	46.9725	40.2004	45.0014	44.7573	45.2308						800	0.308969	0.2	1.31529	0	0	0	0.1	0.3	0	0
801	64.0031	51.2075	48.5343	47.3966	43.8806	46.9725	40.3625	45.1004	44.9978	45.1146						801	1.51228	0	1.5	0	0.707107	0	0.223607	0	0.5	0
802	64.0031	51.2075	48.5343	47.3384	43.8806	46.9725	40.1878	45.1994	44.9978	45.1146						802	0.654455	0	1.10454	0	0.2	0.1	0	0.141421	0.1	0
803	64.0031	51.3038	48.5343	47.3384	43.8806	46.9725	39.6301	45.1994	45.7777	45.0212						803	0.148305	0	0.316228	0	0.1	0.1	0	0	0.1	0.141421
804	64.0031	51.7045	48.6789	47.3384	43.8806	46.4193	39.5395	45.0014	45.9076	45.1146						804	0.798285	0	0	0.141421	0	0.1	0	0	0.223607	0
805	64.0031	51.8086	48.6789	47.5592	43.8806	46.4193	38.7699	44.8035	45.9076	45.0212						805	0	0	0.894427	0	0	0	0	0	0	0
806	64.0031	51.6337	48.6789	47.6643	43.8806	46.4193	38.5654	44.9462	45.9076	45.0212						806	0	0	0.2	0	0	0	0	0	0	0
807	64.0031	51.6121	48.6789	47.6643	43.8806	46.4193	38.6727	45.06	45.9076	45.0212						807	0	0	0	0	0	0	0	0	0	0
808	64.0031	51.4255	48.6789	47.5592	44.0941	46.4193	38.5586	45.06	45.852	45.0212						808	0.148305	0	0	0.2	0	0	0	0	0	0
809	64.0031	51.3687	49.0761	47.5592	44.0219	46.4193	39.0887	45.06	45.7592	45.1957						809	0.160664	0	0	0	0	0	0	0	0.412311	0
810	64.7878	51.2194	49.0761	47.5592	44.0219	46.4193	39.3697	45.06	45.7592	45.2796						810	0	0	0	0	0	0	0	0.141421	0.223607	0
811	64.7878	51.2951	49.0761	47.5592	44.0219	46.4193	40.1345	45.06	45.704	45.2796						811	0	0	0	0	0	0	0	0	0	0
812	64.7878	51.2951	48.9768	47.5592	44.0219	46.4193	40.1345	45.1589	45.633	44.8345						812	0	0	0	0	0	0	0.5	0	0	0
813	64.7878	51.2407	48.5914	47.5592	44.0219	46.4193	40.1345	45.06	45.6871	45.2796						813	0	0	0	0	0.2	0.223607	0	0	0	0.316228
814	64.7878	51.2407	48.5914	47.6174	44.0219	46.4843	40.1345	45.06	45.5947	45.2546						814	0	0	0	0	0	0	0	0.1	0	0
815	64.7878	51.2407	48.5914	47.6406	44.0219	46.4843	40.0868	45.06	45.5947	45.2796						815	0	0	0.412311	0.538516	0	0	0	0.1	0	0
816	64.7878	51.2407	48.5914	47.6406	44.0941	46.4843	39.8157	45.1853	45.5023	45.1262						816	0	0	0.141421	0	0	0	0	0.1	0	0
817	64.7878	51.2407	48.5914	47.6406	44.1664	46.4843	40.3664	45.2793	45.5023	45.0917						817	0	0	0	0.2	0	0	0	0	0	0
818	64.7878	51.4256	48.9615	47.6406	44.1664	46.4843	40.2789	45.5771	45.5023	45.0917						818	0	0.316228	0	0.141421	0	0	0	0	0	0.1
819	64.7878	51.4256	49.2014	47.6406	44.6071	46.4843	40.5023	45.5771	45.0407	45.0917						819	0.176171	0	0	0.1	0	0	0	0	0	0.141421
820	64.7878	51.4256	49.3075	47.6406	44.7536	46.5494	40.5023	45.6644	45.0794	45.0917						820	0.82442	0.447214	0	0	0	0	0.316228	0	0	0.141421
821	64.7878	51.4256	49.2695	47.6406	44.6858	46.6147	40.5023	45.6644	44.9873	45.0324						821	0	0.223607	0	0.1	0	0	0.1	0	0.728011	0
822	64.7878	51.4256	49.2695	47.6174	44.6858	46.539	40.5023	45.6644	44.8423	45.0324						822	0	0	0	0	0	0	0	0	0.3	0.223607
823	64.7878	51.4256	49.8285	47.6174	44.6858	46.539	40.5023	45.6644	44.8423	45.0324						823	0	0	0.141421	0	0	0	0	0	0.2	0.2
824	64.7878	51.4256	49.8722	47.6174	44.6858	46.539	40.5023	45.6644	44.8423	45.0324						824	0	0	0.3	0	0	0	0	0	0	0.1
825	65.7543	51.4256	49.8722	47.6174	44.6858	46.539	40.5023	45.6644	44.8423	45.0324						825	0	0	0.223607	0	0.141421	0	0	0	0	0
826	65.7543	51.4256	49.8722	47.7342	44.6858	46.539	40.5023	45.6644	44.8423	45.0324						826	0	0	0.1	0	0	0	0	0	0.360555	0
827	66.4319	51.4256	49.8722	47.7342	44.6858	46.539	40.5023	45.6644	44.9091	45.0324						827	0	0	0.223607	0	0	0	0	0	0	0.1
828	66.4319	51.4256	49.8722	47.7342	44.6858	46.539	40.5023	45.5534	44.6858	45.0324						828	0	0	0	0	0.1	0	0	0	0	0.141421
829	66.4319	51.4256	49.8722	47.7342	44.6858	46.539	40.5023	45.5534	44.6858	45.0324						829	0	0	0.2	0	0.1	0	0	0	0	0.1
830	66.4319	51.4256	49.8722	47.7342	44.6858	46.539	40.0071	45.5534	44.6858	45.0324						830	0	0	0	0	0	0	0	0	0	0
831	66.4319	51.4256	49.8722	47.7342	44.539	46.5947	40.0071	45.5534	44.6858	45.2796						831	0	0	0	0	0	0	0	0	0.1	0
832	66.9182	51.4256	49.8722	47.7342	44.539	46.5947	40.0071	45.4541	44.6858	45.2796						832	0	0	0	0.1	0	0	0	0	0.2	0
833	67.1297	51.4256	50.2844	47.8676	44.539	46.5947	40.0071	45.3547	44.6858	45.2796						833	0.468622	0.3	0	0	0	0	0	0	0	0
834	67.2715	51.4256	50.2091	47.8676	44.539	46.5947	40.0071	45.2554	44.6858	45.2796						834	0	0	0	0.223607	0	0	0	0	0	0
835	67.2715	51.4256	50.2091	47.7491	44.539	46.5947	40.0071	45.2554	44.6858	45.2796						835	0	0.412311	0	0	0	0.1	0	0	0	0
836	67.2715	51.2194	50.2091	47.7708	44.539	46.5947	40.0071	45.2554	44.6858	45.3139						836	0	0.2	0	0	0	0	0	0	0	0
837	67.3389	51.2194	50.2091	47.8297	44.539	46.5947	40.0071	45.2554	44.6858	45.2546						837	0	0	0.223607	0	0	0	0.4	0	0	0
838	67.3389	51.2558	50.2091	47.8297	44.539	46.5947	40.2224	45.2554	44.6858	45.1957						838	0	0	0	0	0	0	0	0	0	0.1
839	69.133	51.1071	50.2091	47.7708	44.539	46.5947	40.1345	45.2554	45.1529	45.1957						839	0	0.223607	0	0	0	0	0	0	0	0.1
840	69.9207	51.1071	50.2091	52.6759	44.539	46.5947	40.1345	45.2554	45.0302	45.0436						840	0	0	0	0	0.3	0	0.2	0	0	0.141421
841	70.7078	51.1071	50.1341	47.7708	44.539	46.5947	40.1345	45.2554	44.9493	44.8565						841	0	0	0	0.2	0.3	0	0	0	0	0
842	71.8354	51.1071	50.2026	47.7708	44.539	46.5947	40.1345	45.2554	44.9493	44.8921						842	0	0	0	0.141421	0	0	0	0	0	0
843	72.5295	51.1071	50.1519	47.7708	44.3977	46.5947	40.1345	45.2554	44.9493	44.8921						843	0	0	0	0	0.223607	0	0	0	0	0
844	73.7229	51.1071	50.1756	47.7708	44.3977	46.5947	40.1345	45.2554	44.5942	44.8921						844	0	0	0.141421	0	0.1	0	0.223607	0	0	0
845	75.0987	51.1071	50.1263	47.7708	44.3977	46.5947	40.1345	45.2554	44.5942	44.7987						845	0	0	0	0	0	0	0	0	0	0
846	75.0987	51.1071	50.1263	47.7708	44.3244	46.5947	40.1345	45.2554	44.5942	44.8565						846	0	0	0	0	0	0	0	0	0.282843	0
847	73.381	51.1071	50.3204	47.7708	44.2513	46.5947	40.1345	45.2554	44.5942	44.8921						847	2.53859	0	0	0	0	0	0	0	0	0.2
848	73.522	51.1071	50.3204	47.7708	44.2513	46.5947	40.1345	45.2554	44.5942	44.8921						848	3.14934	0	0	0	0	0	0	0	0	0
849	74.2314	51.1071	50.3204	47.7708	44.2513	46.5947	40.1345	45.2554	44.6344	44.8921						849	0.176171	0	0	0	0	0	0	0	0	0
850	73.6214	51.1071	50.3204	47.8297	44.2513	46.5947	40.1345	45.2554	44.5542	44.8921						850	0.369828	0	0	0	0	0	0	0	0	0
851	73.6848	51.3857	50.3204	47.8297	44.2513	46.5947	40.1345	45.2554	44.5542	44.8921						851	0.366453	0	0	0	0	0	0	0	0.1	0.2
852	73.6848	51.3857	50.3204	47.8676	44.2513	46.5947	40.1345	45.2554	44.5542	44.8921						852	0.162619	0	0	0	0	0	0	0	0	0.1
853	73.8282	51.7209	50.3204	47.8676	44.2513	46.6605	40.1345	45.2554	44.5542	44.8921						853	0.587111	0	0	0	0	0.1	0	0	0	0.1
854	74.1161	51.5348	50.3204	47.8676	44.2513	46.6605	40.1345	45.2554	44.5542	44.8921						854	1.44704	0	0	0	0.3	0.538516	0	0	0	0
855	74.1161	51.5348	50.3699	47.8676	44.2513	46.6605	40.4862	45.2554	44.5542	44.8921						855	1.06121	0	0	0	0.141421	0	0	0	0	0
856	74.1161	51.5348	50.3699	47.8676	44.2513	46.6605	40.4862	45.2554	44.5542	44.9278						856	0.369828	0	0	0	0	0.1	0	0	0	0
857	74.4499	51.3857	50.3699	47.8676	44.2513	46.6605	40.4862	45.2554	44.5542	44.8345						857	0.693619	0.1	0	0	0	0	0	0	0	0
858	74.8007	51.3857	50.3699	47.8676	44.0325	46.6605	40.3103	45.2554	44.5542	44.7772						858	0	0.2	0	0	0.223607	0	0	0.447214	0	0
859	75.1797	51.3857	50.3699	47.7491	43.8146	46.6605	40.3103	45.2554	44.5542	44.7772						859	0	0	0	0	0	0	0	0.1	0	0
860	75.8394	51.3857	50.3699	47.6093	43.8146	46.6605	40.3103	45.2554	44.5542	44.7772						860	0	0.1	0	0	0.2	0.1	0	0	0	0
861	76.1272	51.3857	50.3699	47.6093	43.7392	46.6605	40.3103	45.2554	44.5542	44.7772						861	0	0.360555	0	0	0.1	0	0	0	0	0
862	77.6009	51.3857	50.4436	47.6093	43.8085	46.6605	40.0868	45.2554	44.5542	44.7772						862	0	0	0	0	0.360555	0	0	0	0	0
863	78.2519	51.3857	50.4436	47.6093	43.8085	46.6605	40.0868	45.2554	44.5542	44.7772						863	0.2286	0	0	0	0	0	0	0	0.1	0
864	78.3899	51.3857	50.4436	47.6093	43.8085	46.6605	40.0868	45.2554	44.291	44.7772						864	0	0	0	0	0.223607	0	0	0.360555	0	0
865	79.0516	51.3857	50.4436	47.6093	43.8085	46.6605	40.0868	45.2554	44.291	44.85						865	0	0	0	0	0.2	0	0	0.1	0	0
866	79.0516	51.3857	50.4436	47.6093	43.8085	46.6605	40.0868	45.2554	44.291	44.85						866	0	0	0.360555	0	0	0	0	0	0	0
867	79.0516	51.3857	50.4436	47.6093	43.8085	46.6605	40.0868	45.2554	44.291	44.85						867	0	0	0	0	0.223607	0	0	0	0	0
868	79.0516	51.3857	50.4436	47.6093	43.8085	46.6605	40.0868	45.2554	44.291	44.85						868	0	0.5	0	0	0.1	0.1	0	0	0	0
869	78.9132	51.3857	50.4436	47.6093	43.8085	46.6605	40.0868	45.2554	44.1993	45.0362						869	0	0.1	0	0	0.1	0	0	0	0	0
870	78.7634	51.3857	50.4436	47.6093	43.8085	46.6605	40.0868	45.2554	44.1993	44.9431						870	0	0	0	0	0	0	0.223607	0	0	0
871	78.7634	51.3857	50.4436	47.6093	43.8085	46.5853	40.0868	45.2554	44.1993	44.85						871	0.600538	0.282843	0	0	0	0	0	0	0	0
872	78.7634	51.3857	50.4436	47.6093	44.025	46.3442	40.0868	45.2554	44.1993	44.85						872	0	0.223607	0	0	0.223607	0	0	0	0	0.1
873	78.7634	51.3857	50.4436	47.6093	44.0219	46.3442	40.0868	45.2554	44.1993	44.85						873	0	0	0	0	0.1	0.1	0.1	0	0	0.360555
874	78.7634	51.3857	50.4436	47.6093	44.0219	46.4187	40.0868	45.2554	44.1993	44.85						874	0	0	0	0	0	0	0	0	0	0.1
875	78.7634	51.4228	50.4436	47.6093	44.0219	46.4187	40.0868	45.2554	44.1993	44.85						875	0	0	0	0	0	0	0	0	0	0.1
876	78.7634	51.4974	50.4436	47.6093	43.956	46.4187	40.0868	45.6763	44.1993	44.85						876	0	0	0	0.223607	0	0	0	0	0	0.2
877	78.7634	51.4974	50.4436	47.6093	43.956	46.4187	40.0868	45.5771	44.1993	44.85						877	0	0	0	0	0	0	0	0	0	0
878	78.7634	51.4047	50.4436	47.6093	44.0941	46.4854	40.0868	45.5771	44.1993	44.85						878	0	0	0	0	0.223607	0	0.141421	0	0	0.1
879	78.7634	51.3332	50.4436	47.6093	44.1664	46.4854	40.0868	45.5771	44.1993	44.85						879	0	0	0	0.632456	0.141421	0.1	0	0	0	0
880	78.8273	51.3332	50.4436	47.6093	44.5215	46.4854	40.0868	45.5771	44.1993	44.85						880	0	0	0	0	0.1	0	0	0	0	0
881	79.5124	51.3332	50.4436	47.6093	44.5215	46.4854	40.0868	45.5771	44.291	44.85						881	0	0	0	0.223607	0	0	0	0	0	0.141421
882	79.5124	51.3332	50.4436	47.6093	44.7319	46.4854	40.0868	45.2554	44.291	44.85						882	0	0	0	0	0	0	0	0	0.2	0
883	79.5124	51.3332	50.4436	47.6093	44.8767	46.4854	40.0868	45.1561	44.291	44.85						883	0	0	0	0	0	0	0	0	0	0
884	79.5124	51.3332	50.1994	47.6093	44.8767	46.4854	40.0868	45.1561	44.291	44.85						884	1.06121	0	0	0.5	0	0.360555	0.3	0	0.1	0
885	79.5124	51.3332	50.1994	47.6093	44.9534	46.4854	40.0868	45.1561	44.291	44.85						885	0.642561	0	0	0.282843	0	0.223607	0.141421	0.5	0	0
886	79.5124	51.7638	50.1994	47.6093	44.885	46.5522	40.0868	45.1561	44.291	44.85						886	0	0.4	0.2	0.2	0.1	0.223607	0	0.316228	0	0
887	79.5124	51.6716	50.1994	47.6093	44.9534	46.5522	40.0868	45.1561	44.291	44.85						887	1.38226	0.141421	0.3	0	0.1	0	0	0	0	0
888	79.5124	51.6716	50.1994	47.6093	44.9534	46.5522	40.08	45.1561	44.291	44.85						888	0	0	0	0.1	0.1	0	0	0	0	0
889	79.5124	51.7792	50.1994	47.6093	44.9534	46.5522	40.08	45.1561	44.291	44.85						889	0.160664	0.360555	0	0.141421	0.1	0	0	0	0	0
890	79.5124	51.7638	50.1994	47.6093	44.8767	46.5522	40.08	45.1561	44.291	44.9431						890	0	0	0.2	0.141421	0	0.223607	0	0	0.1	0
891	79.5124	51.7638	50.1994	47.6093	44.8043	46.6192	39.9919	45.1561	44.291	44.6479						891	0	0	0	0	0	0.2	0	0	0.316228	0
892	79.5124	51.7638	50.1994	47.6093	44.8043	46.6192	39.9919	45.1561	44.291	44.5546						892	0	0	0	0	0.316228	0	0	0	0	0
893	79.5124	51.7638	50.1994	47.6093	44.8043	46.6192	39.9919	45.1561	44.291	44.5186						893	0	0	0	0	0	0	0	0	0	0
894	79.3563	51.7638	50.1994	47.6474	44.8043	46.6192	39.9919	45.1561	44.291	44.4471						894	0	0	0	0	0.1	0.1	0	0	0	0
895	79.3563	51.7638	50.1994	47.6474	44.8043	46.6192	39.9919	45.1561	44.291	44.4471						895	0	0	0	0	0	0.2	0	0	0	0
896	79.3563	51.7638	50.1994	47.6474	44.8806	46.6192	40.1273	45.1561	44.291	44.4827						896	0	0	0	0	0	0	0	0	0.424264	0
897	79.3563	51.7638	50.1994	47.455	44.8767	46.6863	40.1273	45.1561	44.291	44.4827						897	0	0	0	0.1	0	0	0	0	0	0
898	79.3563	51.7638	50.1994	47.455	44.8079	46.6863	40.1273	45.1561	44.291	44.4827						898	0	0	0.360555	0.5	0	0	0	0	0.141421	0
899	79.3563	51.7638	50.1994	47.2343	44.8079	46.6863	40.1273	45.1561	44.291	44.6119						899	0	0	0.3	0.640312	0	0	0	0	0	0
900	79.3563	51.7638	50.1994	47.2343	44.8079	46.6863	40.1273	45.1561	44.2119	44.6119						900	0	0	0	0	0	0	0	0.1	0	0
901	79.3563	51.7638	50.1994	47.2343	44.8079	46.6863	40.1273	45.1561	44.2119	44.6119						901	0	0	0	0	0	0	0	0.3	0	0
902	79.3563	51.7638	50.1994	47.3855	44.8079	46.3297	39.8633	45.1561	44.12	44.6119						902	0	0	0	0	0	0.538516	0	0.3	0	0
903	79.3563	51.7638	50.1994	47.4342	44.8079	46.1144	39.8233	45.2175	44.12	44.6119						903	0	0	0.1	0	0	0	0	0.1	0	0
904	79.3563	52.133	50.2476	47.3201	44.7354	45.8992	39.8233	45.1579	44.12	44.6119						904	0	0	0.141421	0	0	0	0	0	0	0
905	79.3563	52.0791	50.3212	47.3201	44.6629	45.8992	39.8233	45.1579	44.12	44.6119						905	0	0	0	0	0	0	0	0	0	0
906	86.9956	52.0791	50.3212	47.3771	44.7354	45.8992	39.8233	45.1579	44.12	44.6119						906	0	0	0.223607	0	0	0	0	0	0	0
907	86.9956	52.0116	50.3212	47.3523	44.6629	45.8992	39.8233	45.1579	44.12	44.6119						907	0	0	0	2.5	0	0	0.412311	0	0	0
908	86.2577	52.0116	50.3713	47.3279	44.6629	45.6842	39.8233	45.1579	44.0807	44.6119						908	0	0.565685	0	0	0	0	0.141421	0	0	0
909	86.4251	52.0116	50.3713	47.3279	44.6629	45.5494	39.8233	45.1579	44.3179	44.6119						909	0	0	0	0	0	0	0	0.4	0	0
910	86.5231	52.0116	50.3713	47.3279	44.8121	45.5494	39.8233	45.1579	44.3179	44.6119						910	0	0	0	0.8544	0	0	0	0	0	0
911	86.8351	52.0116	50.3713	47.3279	44.8121	45.5494	39.8233	45.1579	44.3179	44.6119						911	0	0	0.223607	0.223607	0	0.1	0	0	0	0
912	87.2	52.0116	50.3713	47.3279	44.7393	45.4754	39.8233	45.1579	44.3179	44.6119						912	0	0	0	0.2	0	0	0	0	0	0
913	87.2909	52.0116	50.3713	47.3279	44.7393	45.3279	39.8233	45.1579	44.3179	44.6119						913	0	0	0	0.1	0	0	0	0	0	0
914	87.8773	52.0116	50.3713	47.3279	44.7393	45.3279	39.8233	45.1579	44.7111	44.6119						914	0	0	0	0	0.316228	0	0	0	0	0
915	88.2653	52.0116	50.3713	47.3855	44.7393	45.3279	39.8233	45.1579	44.7111	44.6119						915	0	0	0	0.1	0.1	0	0.316228	0.316228	0	0
916	88.244	52.0116	50.4903	47.5414	44.7393	45.3279	39.8233	45.1579	44.5799	44.6119						916	0	0	0	0.9	0	0	0	0	0	0
917	88.3216	52.0116	50.4175	47.5903	44.7393	45.3279	39.8233	45.1579	44.5799	44.6119						917	0	0	0	0.412311	0	0.1	0	0	0	0
918	88.0471	52.0116	50.4175	47.5903	44.7393	45.3279	39.8233	45.0588	44.5799	44.6119						918	0	0	0	0.424264	0	0	0	0	0	0
919	88.0471	52.0116	50.4175	47.5903	44.7393	45.3279	39.8233	44.7616	44.5799	44.6119						919	0	0	0	0.424264	0	0	0	0	0	0
920	88.0471	52.0116	50.4175	47.5903	44.7393	44.8246	39.8233	44.7217	44.5799	44.6119						920	0	0	0	0.360555	0	0	0	0	0	0
921	88.0471	52.0116	50.3204	47.5903	44.7393	44.8246	39.8233	44.8209	44.5799	44.6119						921	0	0	0	0.1	0	0.1	0	2.14709	0	0
922	88.0471	52.0116	50.2476	47.5903	44.7393	44.8246	39.8233	44.8209	44.5799	44.6119						922	0	0.894427	0	0.2	0	0	0.1	0.360555	0	0
923	88.0471	52.0116	50.2476	47.5903	44.7393	44.8246	39.8233	44.8209	44.5799	44.6119						923	0	0	0	0.608276	0	0	0.1	1.60312	0	0
924	88.2723	52.0116	50.4175	47.5903	44.7393	44.8246	39.8233	44.8209	44.5799	44.6119						924	0	0	0	0.538516	0	0.141421	0	0.1	0	0
925	88.2723	52.0116	50.4175	46.8932	44.7393	44.8246	40.2224	44.8209	44.5799	44.6119						925	0	0	0	0.509902	0	0	0	0.806226	0	0
926	88.2723	51.4872	50.4175	46.8932	44.7393	44.8246	40.1825	44.8209	44.5799	44.6119						926	0	0	0	0	0	0	0	0.424264	0	0
927	88.2723	51.4872	50.4175	46.8932	44.7393	44.8246	40.1825	44.7709	44.5799	44.6119						927	0	0	0	0	0	0	0	0	0	0
928	88.2723	51.4872	50.4175	46.3667	44.7393	44.8246	40.1825	44.7709	44.5799	44.6119						928	0	0	0	0	0	0	0	0	0	0
929	88.2723	51.4872	50.2727	46.1764	44.7393	44.8981	40.1825	44.7709	44.5799	44.6119						929	0	0	0.640312	0	0	0	0	0	0	0
930	88.2723	51.4872	50.2727	46.0063	44.7393	44.8981	40.1825	44.7709	44.5799	44.6119						930	0	0.538516	0.1	0.583095	0	0	0	0	0	0
931	88.2723	51.4872	50.2727	45.9214	44.7393	44.8981	40.1825	44.7709	44.5799	44.6119						931	0	0.223607	0	0.223607	0	0	0	0	0	0
932	88.227	51.4872	50.2727	45.9214	44.8897	44.8981	40.1825	44.7709	44.5799	44.6119						932	0	0	0	0.141421	0	0	0	0	0	0
933	88.227	51.4872	50.2727	45.8365	44.8166	44.8981	40.4937	45.0808	44.5799	44.6119						933	0	0	0	0	0	0	0.141421	0	0	0.1
934	88.227	51.4872	50.2727	45.3669	44.8166	44.8981	40.4937	45.0808	44.5799	44.6119						934	0	0	0	0	0	0	0	0	0	0
935	88.227	51.4872	50.2727	44.9726	44.8166	44.9716	40.4937	45.0808	44.5799	44.6119						935	0	0	0	0	0	0.1	0	0.316228	0	0
936	88.227	51.4872	50.2727	44.5608	44.8166	44.9716	40.4937	45.0808	44.5799	44.6119						936	0	0	0	0	0	0	0	0.4	0	0.1
937	88.227	51.4872	50.2727	44.1493	44.8166	44.9716	40.4937	45.0808	44.5799	44.6119						937	0	0	0	0	0	0	0	0.141421	0	0
938	88.227	51.4872	50.2727	43.7892	44.8166	44.9716	40.4937	45.0808	44.5799	44.6119						938	0	0	0	0.1	0	0	0.2	0	0	0
939	88.227	51.4872	50.2727	43.7034	44.8166	45.0394	40.4937	46.8606	44.5799	44.6119						939	0	0	0	0	0	0.1	0	0	0	0
940	88.227	52.3798	50.2727	43.5319	44.8166	45.0394	40.4059	47.0319	44.5799	44.6119						940	0	0	0	0	0	0	0.5	0	0	0
941	88.227	52.3798	50.2727	43.0711	44.8166	45.0394	40.3182	48.6172	44.5799	44.6119						941	0	0	0	0	0	0	0.1	0	0	0
942	88.227	52.3798	50.2727	42.752	44.8166	45.1807	40.3182	48.5175	44.5799	44.6119						942	0	0	0	0	0	0	0	0.1	0	0
943	88.227	52.3798	50.2727	43.1236	44.8166	45.1807	40.3182	48.3567	44.5799	44.6119						943	0	0	0	0	0	0	0	0	0	0
944	88.227	52.3798	50.2727	43.1236	44.8166	45.1807	40.3182	48.6773	44.5799	44.6119						944	0	0	0	0	0	0	0	0	0	0
945	88.2583	52.3798	50.2727	43.1236	44.8166	45.1807	40.3182	48.6773	44.5799	44.6119						945	0	0.282843	0	0	0	0	0	0	0	0
946	88.67	52.3798	50.2727	43.1236	44.8166	45.1807	40.3182	48.6773	44.5799	44.6119						946	0	0	0	0	0	0.2	0	0	0	0
947	88.67	52.3798	50.5463	43.1236	44.8166	45.1807	40.3182	48.6773	44.5799	44.6119						947	0	0	0	0	0	0	0	0	0	0.1
948	89.452	51.9986	50.4489	43.1347	44.8166	45.1807	40.3182	48.6773	44.5799	44.6119						948	0	0	0	0	0.141421	0.2	0.360555	0	0	0
949	89.452	51.9864	50.4489	43.2503	44.8166	45.1807	40.3182	48.6773	44.5799	44.6119						949	0	0	0	0.141421	0.141421	0.1	0	0	0	0
950	89.3201	51.9864	50.4489	43.2191	44.8166	45.1807	40.3182	48.6773	44.5799	44.6119						950	0	0	0	0	0	0	0	0	0	0
951	89.3201	51.9864	50.4489	43.2191	44.8166	45.1807	40.454	48.6773	44.5799	44.7053						951	0	0	0	0	0.282843	0	0	0	0	0
952	89.3201	51.9864	50.4489	43.2191	44.8166	45.1807	40.454	48.6773	44.5799	44.7053						952	0	0	0	0	0	0	0	0	0	0
953	89.3201	51.9864	50.4489	43.2191	44.8166	45.2542	40.454	48.5563	44.5799	44.7053						953	0	0	0	0	0.223607	0	0	0.3	0	0
954	89.3201	51.9864	50.4489	43.2191	44.8166	45.2542	40.454	48.5851	44.5799	44.7987						954	0	0	0	0	0.1	0	0	0	0	0
955	89.3201	51.9864	50.4489	43.2191	44.8166	45.2542	40.454	48.4779	44.5799	44.7987						955	0	0	0	0	0.223607	0	0	0	0	0
956	89.3201	51.9864	50.4489	43.1347	44.8166	45.2542	40.2789	48.4779	44.5799	44.7987						956	0	0	0	0.360555	0.509902	0	0	0	0	0
957	89.3201	51.9864	50.4489	43.1347	44.8166	45.322	40.2789	48.4779	44.5799	44.7987						957	0	0	0	0	0	0.412311	0	0	0	0
958	89.3201	51.9864	50.4489	43.1347	44.8166	45.322	39.8421	48.4779	44.5799	44.7987						958	0	0	0	0	0	0.1	0	0	0	0
959	89.3201	51.9864	50.4489	43.1347	44.8166	45.322	39.755	48.4779	44.5799	44.7987						959	0	0	0	0	0	0	0	0	0	0
960	89.3201	51.9864	50.4489	43.1347	44.8166	45.322	39.755	48.3781	44.5799	44.7987						960	0	0	0	0	0	0	0	0	0	0
961	89.3201	51.9864	50.4489	43.1347	44.8166	45.322	39.755	48.3781	44.5799	44.7987						961	0	0	0	0.2	0	0	0	0	0	0.1
962	89.3201	51.9864	50.4489	43.1347	44.8166	45.322	39.755	48.3781	44.5799	44.7987						962	0	0	0	0.1	0.223607	0	0	0	0	0.1
963	89.3201	51.7232	50.4489	43.1347	44.8166	45.322	39.755	48.3781	44.5799	44.7987						963	0	0.806226	0	0	0.3	0	0	0	0.1	0.1
964	89.3201	51.7232	50.4489	43.1347	44.8166	45.1866	39.755	48.3781	44.5799	44.7987						964	0	0	0	0	0	0	0	0.1	0.447214	0
965	89.3201	51.7232	50.4489	43.1347	44.8166	45.1866	39.755	48.3781	44.5799	44.8921						965	0	0	0	0.1	0.223607	0	0	0	0.223607	0
966	89.3201	51.7232	50.4489	43.1347	44.8121	45.3342	39.9196	48.3781	44.5799	44.8921						966	0	0	0	0	0	0	0	0.1	0	0
967	89.3201	51.7232	50.4489	43.1042	44.8079	45.2603	39.9196	48.3781	44.5799	44.8921						967	0	0.1	0	0.1	0	0	0	0.1	0	0
968	89.3201	51.7232	50.4489	43.1042	44.8079	45.2603	39.9196	48.3781	44.5799	44.8921						968	0	0.1	0	0	0.1	0	0	0	0	0
969	89.3201	51.7232	50.4489	43.1042	44.8166	45.2603	39.9196	48.3781	44.5799	44.8921						969	0	0	0.67082	0	0	0	0.67082	0	0	0
970	89.3201	51.7232	50.4489	43.1042	44.8166	45.2603	39.9196	48.3781	44.5799	44.8921						970	0	0	0	0	0	0	0.3	0.141421	0	0
971	89.3201	51.7232	50.4489	43.1042	44.6071	45.2603	39.9196	48.079	44.5799	44.8921						971	0	0	0	0	0.1	0.3	0.1	0	0	0
972	89.3201	51.7232	50.4489	43.1042	44.5339	45.2603	39.9196	48.079	44.5799	44.8921						972	0	0	0	0	0	0	0	0	0.608276	0
973	89.3201	51.7232	50.4489	43.1042	44.5979	45.2603	39.9196	48.079	44.5799	44.8921						973	0	0	0	0	0	0	0	0	0.447214	0
974	89.3201	51.7232	50.4489	42.7743	45.0311	45.2603	39.9196	48.079	44.5799	44.8921						974	0	0	0.2	0.2	0	0.1	0	0	0.1	0
975	89.3201	51.7232	50.4489	42.7743	45.0311	45.0656	39.9196	48.079	44.5799	44.8921						975	0	0	0.4	0.412311	0	0.223607	0	0	0	0
976	89.3201	51.7232	50.4489	42.7743	45.0311	44.9988	39.9196	48.079	44.5799	44.8921						976	0	0	0	0	0	0	0	0	0	0
977	89.3201	51.7232	50.4489	42.7743	45.0311	44.9988	39.9196	48.079	44.5799	44.8921						977	0	0	0	0	0	0	0	0	0	0
978	89.3201	51.7232	50.4489	42.7743	45.0311	44.9988	39.9196	48.079	44.5799	44.8921						978	0	0	0	0	0	0.1	0	0	0	0
979	89.3201	51.7232	50.4489	42.8819	45.0311	44.9988	39.9196	48.079	44.5799	44.9278						979	0	0	0	0	0	0	0	0	0.1	0
980	89.3201	51.7232	50.4489	42.828	44.8166	44.9988	39.9196	48.079	44.5799	45.0212						980	0	0.360555	0	0	0	0	0	0	0.360555	0
981	89.3201	51.8175	50.4489	42.828	44.6123	44.9988	39.9196	48.079	44.6191	44.9278						981	0	0	0	0	0	0	0	0	0	0
982	89.3201	51.8175	50.4489	42.828	44.6123	44.9988	39.9196	47.9792	44.9608	44.9278						982	0	0	0	0	0	0.141421	0.3	0	0	0
983	89.3201	51.8175	50.4489	42.7437	44.8216	44.9988	39.9196	47.9792	44.7897	44.9278						983	0	0	0	0	0	0.1	0	0	0	0
984	89.3201	51.8175	50.4489	42.7437	44.8216	44.9988	39.9196	48.079	44.7897	44.9278						984	0	0.1	0	0	0.141421	0	0	0.3	0	0
985	89.3201	51.7792	50.4489	42.6899	44.8216	44.9988	39.9196	47.9792	44.7897	44.9278						985	0	0	0	0	0	0.141421	0.2	0	0	0
986	89.3201	51.6868	50.4489	42.6899	44.7484	44.9988	39.9196	47.9792	44.7897	44.9278						986	0	0.360555	0	0	0	0	0.1	0	0	0.447214
987	89.3201	51.6868	49.9341	42.6899	44.7484	44.9988	39.3687	47.9792	44.7897	44.9278						987	0	0	0	0	0	0	0	0	0	0
988	89.3201	51.6868	49.9341	42.6899	44.7484	44.9988	39.2271	48.0866	44.7897	44.9278						988	0	0	0	0	0.2	0	0	0	0	0
989	89.3201	51.6868	49.9341	42.6899	44.8216	45.1996	39.1803	48.0866	44.7897	44.9278						989	0	0	0	0	0	0	0	0	0	0
990	89.3201	51.6868	49.9341	42.6899	44.8216	45.1996	39.1803	48.0866	44.1993	44.9278						990	0	0	0.583095	0	0	0.2	0	0	0	0.4
991	89.3201	51.6868	49.9341	42.6899	44.8216	45.1996	39.1803	48.0866	44.6458	44.9278						991	0	0	0	0	0	0	0	0	0	0.2
992	89.3201	51.6868	49.8876	42.7977	44.8216	45.2668	39.1803	48.0866	44.7376	44.9278						992	0	0	0.223607	0	0	0	0	0	0	0
993	89.3201	51.6868	49.4984	42.6673	44.8216	45.3279	39.1803	48.0866	44.7376	44.9278						993	0	0	0.1	0.412311	0	0	0	0	0	0
994	89.3201	51.6868	49.4984	42.6673	44.8216	45.3279	39.1803	48.0866	44.7376	44.9278						994	0	0	0	0.1	0	0	0	0	0	0
995	89.3201	51.6868	49.4984	42.6673	44.8216	45.3279	39.1803	48.0866	44.7376	44.9278						995	0	0.1	0	0.223607	0	0	0	0	0	0
996	89.3201	51.6868	49.4984	42.6673	44.8216	45.2603	39.1803	48.0866	44.7376	44.9278						996	0	0	0	0.824621	0.282843	0	0	0	0	0.223607
997	89.3201	51.6868	49.4984	42.6673	44.8216	45.2603	39.1803	48.0866	44.6458	44.9278						997	0	0	0	0.141421	0.223607	0	0	0	0.2	0
998	89.3201	51.3332	49.4984	42.6673	44.8216	45.2603	39.1803	48.0866	44.8423	44.9278						998	0	0	0	0	0	0	0	0	0	0
999	89.3201	51.3332	49.4984	42.6673	44.8216	45.2603	39.1803	48.0866	44.8423	44.9278						999	0	0	0	0	0	0	0	0	0.1	0
1000	89.3201	51.3332	49.4984	42.6673	44.8216	45.4016	39.4458	48.0866	44.8423	44.9278						1000	0	0	0	0.223607	0	0	0.2	0	0.223607	0
1001	89.3201	51.3332	49.4984	42.6673	44.8216	45.4754	39.4458	48.0866	44.8423	44.9278						1001	0	0	0.360555	0.1	0	0	0	0	0.412311	0
1002	89.3201	51.4256	49.4984	42.6673	44.8166	45.4754	39.4458	48.0644	44.8423	44.9278						1002	0	0	0	0	0	0	0	0	0.6	0
1003	89.3201	51.4256	49.4984	42.6673	44.8166	45.6167	39.2688	48.0644	44.8423	44.9278						1003	0	0	0	0	0.2	0.1	0	0	0.67082	0
1004	89.3201	51.7252	49.4984	42.6673	44.8166	45.6167	39.1803	48.0644	44.8423	44.9734						1004	0	0	0	0	0	0.1	0	0	0.2	0
1005	89.3201	51.7252	49.4984	42.6673	44.8166	45.6167	39.1803	48.0644	44.8423	44.9734						1005	0	0	0	0	0	0	0	0	0	0
1006	89.3201	51.7252	49.4984	42.6673	44.6707	45.6167	39.1803	48.0644	44.8423	44.9734						1006	0	0	0	0	0	0	0	0	0.223607	0
1007	89.3201	51.7252	49.4984	42.6673	44.6707	45.6167	39.1803	48.0644	44.8423	44.9734						1007	0	0	0	0	0	0	0	0	0.316228	0
1008	89.3201	51.7252	49.9167	42.6673	44.6707	45.7647	39.1803	48.0644	44.8423	45.1146						1008	0	0	0	0	0	0	0	0.360555	0.1	0
1009	89.3201	51.7252	49.9167	42.6673	44.6707	45.7647	39.1803	48.0644	44.8423	45.0436						1009	0	0	0	0	0	0	0	0	0	0
1010	89.3201	51.7252	49.8646	42.6673	44.6707	45.7647	39.1803	48.0644	44.8423	45.0436						1010	0	0	0	0	0	0.1	0	0	0	0
1011	89.3201	51.7252	49.8876	42.5405	44.6707	45.7647	39.1803	48.0644	44.8423	45.0436						1011	0	0	0	0.1	0.583095	0	0	0	0	0.1
1012	89.3201	51.7252	49.8876	42.4554	44.6707	45.7647	39.1803	48.0644	44.8423	45.0436						1012	0	0.223607	0	0.316228	0.1	0.1	0.1	0	0	0
1013	89.3201	51.6329	49.8876	42.2653	44.6707	45.7647	39.1803	48.0644	44.8423	45.0436						1013	0	0	0	0	0.1	0.1	0	0	0	0.141421
1014	89.3201	51.6329	49.8876	41.6798	44.6629	45.7647	39.1803	48.0644	44.8423	44.8921						1014	0	0	0	0	0	0	0	0	0	0
1015	89.3201	51.6329	49.8876	41.8169	44.7289	45.7647	39.1803	48.0644	45.0263	44.8921						1015	0	0	0	0	0.1	0	0	0	0	0
1016	89.3201	51.6329	49.8876	41.8169	44.7289	45.7647	39.1803	48.0644	45.0263	44.8921						1016	0	0	0	0	0	0.141421	0	0	0	0
1017	89.3201	51.6329	49.8876	41.8169	44.7289	45.7647	39.1803	48.0644	45.0655	44.8921						1017	0	0.360555	0.424264	0	0	0	0	0	0	0
1018	89.3201	51.6329	49.8876	41.8008	44.7289	45.7647	39.0036	48.0644	45.0526	44.8921						1018	0	0	0	0.2	0.141421	0	0	0	0	0
1019	89.3201	51.6329	49.7633	41.7501	44.7289	45.7647	39.0036	48.0644	45.3045	44.8921						1019	0	0	0	0	0	0	0	0	0.1	0
1020	89.3201	51.6329	49.7633	41.7501	44.7289	45.7647	39.0036	48.0644	44.7563	44.8921						1020	0	0	0	0	0	0	0	0	0	0
1021	89.3201	51.6329	49.7633	41.7501	44.8733	45.8319	39.0036	48.0644	45.4265	44.8921						1021	0	0	0	0	0	0.1	0	0	0	0
1022	89.3201	51.6329	49.7633	41.7501	44.8733	45.9059	39.0036	48.0644	45.2441	44.8921						1022	0	0	0	0	0	0	0	0	0	0
1023	89.3201	51.6329	49.7633	41.7501	44.8733	45.9059	39.0036	48.0644	45.2441	44.8921						1023	0	0	0.1	0	0.2	0	0	0	0	0
1024	89.3201	51.6329	49.7633	41.7501	44.8733	45.9059	39.0036	48.0644	45.2536	44.8921						1024	0	0	0	0	0.1	0	0	0	0	0
1025	89.3201	51.6329	49.7633	41.7501	44.8733	45.9059	39.0036	48.0644	45.4875	44.8921						1025	0	0	0	0	0	0	0	0	0	0
1026	89.3201	51.6329	49.7633	41.7501	44.8733	45.9059	39.0036	48.2437	45.396	44.8921						1026	0	0	0	0.223607	0.141421	0	0	0	0	0
1027	89.3201	51.6329	49.7633	41.7501	44.8733	45.9059	39.0036	48.2437	45.396	44.8921						1027	0	0	0	0	0	0	0	0	0	0.141421
1028	89.3201	51.6329	49.7633	41.7501	44.8733	45.9732	39.0036	48.2437	45.396	44.8921						1028	0	0	0	0	0	0	0	0	0	0
1029	89.3201	51.6329	49.7633	41.8008	44.7226	45.9732	39.0036	48.2437	45.396	44.9278						1029	0	0	0	0.282843	0	0	0	0	0	0
1030	89.3201	51.856	49.7633	42.0399	44.7926	46.0405	39.0919	48.2437	45.396	44.9278						1030	0	0.2	0	0	0	0	0	0	0.1	0
1031	89.3201	51.856	49.7633	42.0399	44.7214	46.108	39.0919	48.2437	45.396	44.8705						1031	0	0	0	0	0	0	0	0	0	0
1032	89.3201	51.856	49.7633	42.0399	44.7214	46.108	39.0919	48.2437	45.396	44.8705						1032	0	0	0	0	0	0	0	0	0	0
1033	89.3201	51.856	49.7633	42.0399	44.6502	46.108	39.0919	48.2437	45.396	44.8705						1033	0	0	0	0	0	0	0	0	0	0
1034	89.3201	51.856	49.7633	42.0399	44.6502	46.2493	39.0919	48.2437	45.396	44.8705						1034	0	0	0	0	0	0	0	0	0	0
1035	89.3201	52.0566	49.9849	42.0399	44.6502	46.2493	39.0919	48.2437	45.396	44.8705						1035	0	0	0	0	0	0	0	0	0.1	0
1036	89.3201	52.0566	49.9849	42.1428	44.5088	46.2493	39.0919	48.2437	45.396	44.8705						1036	0	0.2	0	0	0	0	0	0	0.2	0
1037	89.3201	52.0566	49.9849	42.1428	44.5088	46.2493	39.0919	48.2437	45.3045	44.8705						1037	0	0.2	0	0	0	0	0	0	0.608276	0
1038	89.3201	52.0566	49.9849	42.1428	44.5088	46.2493	39.0919	48.2437	45.3045	44.8705						1038	0	0	0	0	0	0	0.1	0	0.1	0
1039	89.3201	52.0566	49.9849	42.1428	44.5088	46.3169	39.0919	48.2437	45.3045	44.8705						1039	0	0	0	0	0	0	0	0	0.1	0
1040	89.3201	52.0566	49.9849	42.1428	44.5088	46.3169	39.0919	48.2437	45.3045	44.8705						1040	0	0	0.316228	0	0.1	0	0	0	0.223607	0.1
1041	89.3201	52.0566	49.8876	42.1428	44.3668	46.3169	39.0919	48.2437	45.3045	44.8705						1041	0	0	0.2	0	0	0	0	0	0.223607	0.223607
1042	89.3201	52.0566	49.8876	42.1428	44.296	46.3169	39.0919	48.2437	45.3045	44.8705						1042	0	0	0	0	0.1	0	0	0	0	0
1043	89.3201	52.0566	49.8876	42.1428	44.296	46.3169	39.0919	48.2437	45.3045	44.8705						1043	0	0	0	0	0.223607	0	0	0	0	0
1044	89.3201	52.0566	49.8876	41.9541	44.2963	46.3169	39.0919	48.2437	45.3045	44.8705						1044	0	0	0	0	0.1	0	0	0	0	0.2
1045	89.3201	52.0566	49.8876	41.9541	44.2963	46.3169	39.0919	48.2437	45.213	44.9278						1045	0	0	0	0	0.1	0	0	0	0	0.1
1046	89.3201	52.0566	49.8876	41.9541	44.2963	46.3169	39.0919	48.2437	45.213	44.9278						1046	0	0	0	0	0.1	0	0	0	0	0.316228
1047	89.3201	52.0566	49.8876	41.6798	44.2963	46.3169	39.0919	48.2437	45.213	44.9278						1047	0	0	0	0	0.1	0.360555	0	0	0	0.1
1048	89.3201	52.133	49.8876	41.6798	44.2963	46.3169	39.0919	48.2437	45.213	44.9278						1048	0	0	0	0	0	0	0	0	0.141421	0
1049	89.3201	52.133	49.8876	41.6798	44.2963	46.3169	39.0919	48.2437	45.213	44.9278						1049	0	0	0	0	0	0	0	0	0	0.538516
1050	89.3201	52.133	49.8876	41.6798	44.2963	46.3169	39.0919	48.2437	45.3045	44.9278						1050	0	0	0	0	0	0	0	0	0.3	0.4
1051	89.3201	52.133	49.8876	41.6798	44.2963	46.3169	39.0919	48.2437	45.1216	44.9278						1051	0	0	0	0	0	0	0	0	0	0
1052	89.3201	52.133	49.8876	41.6798	44.2963	46.3169	39.0919	48.2437	45.7108	44.9278						1052	0	0	0	0	0	0	0	0	0.1	0
1053	89.3201	52.133	49.8876	41.6798	44.2963	46.3169	39.0919	48.2437	45.8024	44.9278						1053	0	0	0	0	0	0	0	0	0	0.2
1054	89.3201	52.3177	49.8876	41.6798	44.2963	46.3169	39.0919	48.2437	45.7108	44.9278						1054	0	0	0	0	0	0	0	0	0	0
1055	89.3201	52.133	49.8876	41.6798	44.2963	46.3169	39.0919	48.2437	45.7003	44.9278						1055	0	0	0	0	0	0	0	0	0	0
1056	89.3201	52.133	49.8876	41.6798	44.2963	46.3169	39.1803	48.2437	45.5278	44.9278						1056	0	0	0.2	0	0.1	0	0.282843	0	0.1	0.1
1057	89.3201	52.133	49.8876	41.6798	44.2963	46.3169	39.1803	48.2437	45.5278	44.9278						1057	0	0.2	0.2	0	0.1	0	0	0	0	0.282843
1058	89.3201	52.133	50.1567	41.6798	44.2254	46.3169	39.1803	48.2437	45.5278	44.8345						1058	0	0	0	0	0.316228	0	0	0	0	0
1059	89.3201	52.133	49.962	41.6798	44.2254	46.3169	39.1803	48.2437	45.5278	44.6119						1059	0	0	0	0	0.1	0	0	0	0.2	0
1060	89.3201	52.133	49.962	41.6798	44.1546	46.3169	39.1803	48.2437	45.5278	44.6119						1060	1.61469	0	0	0	0	0	0	0	0	0
1061	89.3201	52.133	49.962	41.6798	44.0845	46.3169	39.1803	48.2437	45.5278	44.6119						1061	0	0	0	0	0.360555	0	0	0	0	0.1
1062	89.3201	52.133	49.962	41.6798	44.0135	46.3169	39.1803	48.2437	45.5278	44.7987						1062	0	0	0	0	0.1	0	0	0	0	0
1063	89.3201	52.133	49.962	41.6798	43.9426	46.3169	39.1803	48.2437	45.477	44.763						1063	1.06121	0	0	0	0	0	0	0	0	0
1064	89.3201	52.133	49.962	41.6798	43.8717	46.3169	39.1803	48.2437	45.477	44.7511						1064	0	0	0	0	0	0	0	0	0	0
1065	89.3201	52.133	49.962	41.6798	43.801	46.3741	39.1803	48.2437	45.2031	44.7163						1065	0	0	0.5	0	0.1	0	0	0	0	0.1
1066	89.3201	52.133	49.962	41.6798	43.801	46.3741	39.1803	48.2437	45.2031	44.7163						1066	0	0	0	0	0	0	0	0	0	0
1067	89.3201	52.133	49.962	41.6798	43.801	46.3741	39.1803	48.2437	45.1118	44.7338						1067	0	0	0	0	0	0	0.223607	0	0	0
1068	89.3201	52.133	49.962	41.6798	43.801	46.3741	39.1803	48.2437	45.1118	44.6013						1068	0	0	0	0	0	0	0	0.1	0	0
1069	89.3201	52.133	49.962	41.6798	43.801	46.3741	39.1803	48.2437	45.1118	44.6013						1069	0	0	0	0	0.4	0	0	0	0	0
1070	89.3201	52.133	49.962	41.6798	43.801	46.3741	39.1803	48.2437	45.1118	44.6013						1070	0	0	0.223607	0	0.141421	0	0	0	0.2	0
1071	89.3201	52.133	49.962	41.6798	43.801	46.3741	39.1803	48.2437	45.0207	44.6672						1071	0	0	0.3	0	0	0	0	0	0	0.223607
1072	89.3201	52.133	49.962	41.6798	43.801	46.3741	39.1803	48.2437	45.0207	44.6672						1072	0.176171	0	0.282843	0	0	0	0	0.316228	0	0.806226
1073	89.3201	52.133	49.962	41.6798	43.801	46.3741	39.1803	48.2437	45.0207	44.6672						1073	0	0	0	0	0	0	0	0	0.282843	0.583095
1074	89.3201	52.133	50.1567	41.6798	43.8717	46.3741	39.4507	48.2437	44.8384	44.5728						1074	1.34886	0	0	0	0	0	0	0	0.1	0.583095
1075	89.3201	51.9483	49.962	41.6798	43.8011	46.3741	39.4507	48.2437	44.8384	44.4513						1075	0.176171	0	0	0	0.141421	0	0	0	0.2	0
1076	89.3201	51.9483	49.962	41.6798	43.9441	46.3741	39.4507	48.2437	44.8384	44.4513						1076	0	0	0	0	0	0	0	0	0	0
1077	89.3201	51.9483	49.962	41.6798	43.8729	46.3741	39.4507	48.2437	44.8384	44.4513						1077	0	0	0	0	0	0.316228	0	0	0	0
1078	89.3201	51.9483	49.962	41.6798	43.8729	46.3741	39.4507	48.2437	44.8384	44.4513						1078	0	0	0	0	0	0.1	0	0.316228	0	0
1079	89.3201	51.9483	49.962	41.6798	43.801	46.3741	39.4507	48.2437	44.8384	44.5455						1079	0	0	0	0	0.1	0	0	0.7	0	0.3
1080	89.3201	51.9483	49.962	41.6798	43.8717	46.3741	39.4507	48.2437	44.6563	44.5455						1080	0.51496	0	0	0	0	0	0	0.4	0.360555	0.4
1081	88.8353	51.9483	49.962	41.6798	43.8717	46.3741	39.4507	48.2437	44.6563	44.5455						1081	0	0	0.583095	0	0.1	0	0	1.2083	0.1	0.1
1082	88.8353	51.9483	49.962	41.6798	43.8717	46.3741	39.4507	48.2437	44.6563	44.5455						1082	0	0	0.412311	0	0	0	0	2.2	0	0
1083	88.8353	51.9483	49.7633	41.6798	43.801	46.3741	39.4507	48.2437	44.9213	44.5792						1083	0	0	0	0	0	0	0	1.64924	0	0
1084	89.8353	51.9483	49.7633	41.6798	43.801	46.3741	39.4507	48.2437	44.963	44.5792						1084	0	0	0	0.4	0	0	0	0.824621	0.2	0
1085	89.8353	51.9483	49.7633	41.6798	43.801	46.3741	39.2271	48.2437	44.7814	44.5792						1085	0	0	0	0	0	0	0	0.707107	0.282843	0
1086	89.8353	51.9483	49.7633	41.6798	43.801	46.3741	39.2271	48.1439	44.7814	44.5792						1086	0	0	0	0	0	0	0	2.61725	0.1	0
1087	89.8353	51.9483	49.7633	41.6798	44.0845	46.3741	39.2271	48.1439	44.7814	44.5792						1087	0	0	0	0	0	0	0	0.905539	0.1	0
1088	89.8353	51.9483	49.714	41.6798	44.084	46.3741	39.2271	48.1439	44.7814	44.5792						1088	0	0	1.70294	0.282843	0	0.2	0	1.3	0.1	0
1089	89.8353	51.9483	49.4229	41.6798	44.084	46.3741	39.2271	48.1439	44.7814	44.5535						1089	0	0	0.640312	0	0	0	0	4.82597	0.5	0
1090	89.8353	51.9483	49.2781	41.6798	44.084	46.3741	39.2271	48.4498	44.7273	44.4253						1090	0	0	0.1	0	0	0	1.76918	2.15407	0.1	0
1091	89.8353	51.9483	49.2781	41.6798	44.084	46.3741	39.2271	48.4498	44.6368	44.5288						1091	0	0	0.9	0	0	0	1.52971	0.583095	0	0.1
1092	89.8353	51.9483	49.2781	41.6798	44.084	46.3741	39.2271	48.4498	44.6368	44.4253						1092	0	0	0	0.223607	0	0	2.21359	0.728011	0	0.1
1093	89.9342	51.9483	49.2781	41.6798	44.0839	46.3741	39.2271	48.4498	44.6368	44.4253						1093	0	0	0	0.1	0.223607	0	2.28254	0.632456	0	0
1094	89.9342	51.9483	49.2781	41.6798	44.0839	46.3741	39.2271	48.4498	44.5516	44.4253						1094	0	0	0	0	0.141421	0	1.61555	0.565685	0	0
1095	90.0933	51.9483	49.2781	41.6798	44.0839	46.2433	39.2271	48.4498	44.2858	44.4253						1095	0	0	0.3	0	0	0	1.96977	0.565685	0.2	0
1096	90.1946	51.9483	49.2781	41.6798	44.0839	46.1756	39.2271	48.5307	44.1952	44.4253						1096	0	0	0.509902	0	0	0	2.06155	0.1	0	0.583095
1097	90.1946	51.9483	49.2781	41.6798	44.1547	46.1756	39.2271	48.5776	44.1046	44.3181						1097	0	0	0	0	0.1	0	2.6	0.5	0	0.806226
1098	90.1946	51.9483	49.2781	41.6798	44.1547	46.1756	39.2271	48.9765	44.014	44.6924						1098	0	0	0	0	0	0	1.83848	0	0.223607	0.141421
1099	90.1946	51.9483	49.1144	41.6798	44.2257	46.1756	39.2271	48.4086	44.4672	44.5988						1099	0	0	0.412311	0	0	0	4.3566	0.2	0	0.5
1100	90.1946	51.9483	49.123	41.6798	44.2257	46.1756	39.2271	48.3449	44.3765	44.5988						1100	0	0	0	0	0	0	1.8868	0.1	0.632456	0
1101	89.8991	51.9483	49.123	41.6798	44.2257	46.1756	39.2271	47.9616	44.3765	44.5988						1101	0	0	0	0	0.824621	0	0	0.608276	0.1	0.316228
1102	89.8991	51.9483	49.123	41.3367	44.2257	46.1756	39.2271	48.7564	44.3765	44.5988						1102	0	0	0	0.141421	0	0	0.2	0.608276	0.781025	0.4
1103	89.8991	51.9483	49.123	41.3367	44.2257	46.1756	39.2271	48.6456	44.3765	44.5988						1103	0	0	0	0	0	0	0	0.141421	0.282843	0
1104	89.8991	51.9483	49.123	41.3367	44.2257	46.1756	39.2271	48.394	44.3765	44.5988						1104	0.360134	0.583095	0	0	0.282843	0	0	0.3	0.282843	0.583095
1105	89.8991	51.9483	49.123	41.3367	44.2257	46.1756	39.2271	48.5431	44.5579	44.5988						1105	0.722094	1.30384	0	0	1.07703	0	0	0.538516	0.707107	0.707107
1106	89.8991	51.9483	49.6988	41.0623	44.2257	46.3112	39.2271	47.9816	44.5579	44.5988						1106	1.35518	0	0	0	1.11803	0.1	0.141421	0	0.412311	2.47588
1107	89.8991	51.9483	49.4695	41.0623	44.2257	46.3112	39.2271	47.5325	44.5579	44.5988						1107	1.98244	0.1	0	0.141421	1.83576	0.360555	0	0.1	1.43178	6.18547
1108	89.8991	51.9483	49.5646	41.0623	44.2257	46.3112	38.6779	48.2524	44.6978	44.5988						1108	0	0.6	0	0.223607	2.60768	0.3	0.583095	0.1	1.65529	4.90408
1109	89.8991	51.9483	48.7093	41.0623	44.2257	46.3112	37.5506	47.9457	44.6978	44.5637						1109	0	0.223607	0	0.2	1.65529	0.905539	0.761577	0.3	1.0198	3.21403
1110	89.8991	51.9483	48.7093	40.8393	44.2257	46.3112	36.181	48.1449	44.77	44.47						1110	0	0.565685	1.07703	0	0.8	0.806226	1.40357	0.141421	0.921954	1.31529
1111	89.8991	51.9483	48.7093	40.7879	44.2977	46.3112	35.2224	47.9524	44.813	44.47						1111	0	0.7	0.824621	3.32415	3.04138	0.707107	0.608276	0.3	1.60312	1.2083
1112	89.8991	51.9483	48.7093	40.7879	44.2967	46.3112	34.4389	48.3615	44.1046	44.47						1112	0	0.316228	1.90263	2.19317	0.761577	0.728011	0	0.316228	0.538516	1.52315
1113	89.8991	51.9483	48.4246	40.7879	44.2967	46.3112	35.0458	47.9524	44.3706	44.47						1113	0	0.5	0.1	1.72627	0.565685	0.1	1.11803	0.921954	0.608276	2.1095
1114	89.8991	51.9483	48.3641	40.7879	44.2265	46.3112	36.7768	48.3615	43.6095	43.8655						1114	0	0	0.1	1.81108	0.141421	2.06155	0	0.1	0.984886	2.00998
1115	89.8991	51.9483	48.3641	40.7879	44.2265	46.3112	38.6097	48.3615	43.2912	43.9208						1115	0	0.141421	0	1.30384	0	0.860233	0	0.223607	0.282843	5.12445
1116	89.8991	51.9483	48.1478	40.7879	44.2265	46.3112	42.9205	48.1615	41.8595	43.4379						1116	0	0.424264	0.2	0.728011	0	1.20416	0	0.921954	0.707107	3.2573
1117	89.8991	51.9483	48.1478	40.7879	44.2265	46.3112	43.5482	48.0616	40.5933	43.4379						1117	0	0	1	0.640312	0	3.03645	0	1.4	1.51327	2.50899
1118	89.8991	51.9483	48.1478	40.7879	43.8131	46.3112	43.5482	48.6641	40.0105	43.4207						1118	0	0	2.08087	0.921954	0	2.37697	0	0.538516	3.62215	2.20036
1119	89.8991	51.9483	48.1478	40.8226	43.8131	46.3112	43.427	48.0616	39.2634	43.2768						1119	0	0.1	1.83576	1.00499	0	0.728011	0	0.282843	3.4	2.72055
1120	89.8991	51.9483	48.1478	40.8226	43.8131	46.3112	43.427	48.159	37.846	43.2768						1120	0	0	1.30384	1.58114	0	0	0.1	0.316228	1.51327	4.21089
1121	89.8991	51.3714	48.1478	40.8226	43.8207	46.3112	43.427	48.4589	37.3083	42.7028						1121	0	0	0.6	2.06446	0	0.583095	0.67082	0.1	0.921954	1.59765
1122	89.8991	50.6352	48.1478	40.8226	44.2852	46.3112	43.427	47.9544	36.7222	42.0594						1122	0	0.3	0	2.29148	0.781025	0	0.538516	0.538516	0.538516	3.94688
1123	89.8991	50.6352	48.1478	40.8226	45.2401	46.3846	43.2869	47.9544	35.7376	39.793						1123	0	0	1.39284	0.812246	1.04403	0.223607	1.36015	0.223607	0.360555	0.837067
1124	90.2557	50.595	48.1478	40.8577	45.8815	46.3297	43.2869	47.8544	35.4716	33.8744						1124	2.71371	0	0.1	1.36096	0.2	0.141421	0.6	0.223607	0.223607	0.55
1125	89.9422	50.046	48.1478	40.8429	46.7708	46.1285	42.7464	47.8525	34.8079	28.9705						1125	1.16614	0	0.141421	1.92938	0.4	0.223607	0.4	0.141421	0.4	0.35141
1126	88.7435	49.9041	48.1478	40.7427	46.4816	45.6071	42.0882	48.1524	33.3639	26.0042						1126	0.933491	0	0.360555	0.649741	0.360555	0	0.4	0.316228	0.8544	0.2
1127	90.335	49.7053	48.8357	40.7427	47.1464	45.456	41.1917	48.0507	30.3426	24.7094						1127	0	0	0	0.586529	0.1	0.360555	1.27279	0.1	0.640312	0.20854
1128	90.335	50.342	49.2827	40.3684	46.9194	45.5226	40.7691	48.0466	27.4178	23.5065						1128	0	0	0	0.667245	0	0	0	0.316228	1.71172	0.79028
1129	90.335	50.3758	50.0327	40.3874	46.8375	45.2406	40.7691	48.3477	26.0521	22.5145						1129	escaped	0.1	1.33417	1.19097	0	0.2	escaped	0.282843	0.6	0.468595
1130	90.335	50.8303	50.069	42.0764	46.9974	45.3192	39.9926	48.1674	25.4245	21.0099						1130		0	0.4	1.06522	0	0.3		0.1	0.8	0.219729
1131	90.335	50.8303	50.1054	43.6835	46.862	44.8159	39.9926	48.1644	25.1362	19.106						1131		0	0.583095	0.205	0.141421	0.1		0.3	2.80179	0.723779
1132	90.335	50.9628	50.1054	43.3386	46.862	45.6762	39.9926	48.3615	25.1556	14.9455						1132		0	0.412311	0	0	0		0.583095	2.54951	0.90469
1133	90.335	51.3606	49.9193	43.3071	46.862	45.9555	39.9926	48.1457	24.9358	12.7116						1133		0	0	0	0.141421	0		0.360555	2	0.135882
1134	90.335	51.3606	49.4023	43.6628	46.862	43.6215	39.9926	48.1544	24.6956	11.6597						1134		0	0	0	0	0		0.3	1.36015	0.292617
1135	90.335	51.3606	48.986	44.0364	46.862	41.7223	39.9926	47.9675	24.4743	11.1667						1135		0	0	0.24299	0	0		0.141421	1.61245	0.135882
1136	90.335	51.2698	48.8766	43.6723	46.862	41.0159	39.9926	48.174	24.5279	11.683						1136		0	0	0.2	0	0		0.3	0.7	0.7
1137	90.335	51.2698	48.7699	43.7977	46.862	41.0159	39.9381	48.4704	23.4685	13.3208						1137		0	0	0.271089	0.860233	0		0.1	0.3	0.2
1138	90.335	51.2698	49.0593	43.8881	46.862	41.527	39.3613	48.4738	23.1752	14.8565						1138		0	0	1.01428	0.921954	0		0.424264	0.761577	0.918417
1139	90.335	51.1447	49.0593	45.8111	47.5871	41.527	38.9252	48.2941	22.8028	18.5002						1139		0	0	0	1.52971	0		0.2	0.72111	0.3
1140	90.335	51.1447	48.1795	46.4447	48.6093	41.3039	37.9071	48.4895	21.5886	19.2075						1140		0	0	0	1.28062	0		0.3	0.2	0.135207
1141	90.3475	51.1447	48.1289	45.511	48.5148	41.167	37.6045	48.2854	19.3711	19.2						1141		0	1.14018	0	0.667245	0		0.5	0.316228	0.209418
1142	91.5126	51.1447	48.0933	44.3514	48.7045	40.9439	37.4067	48.1815	17.506	18.9008						1142		0	0	0	0.224964	0.223607		escaped	0.223607	0.340037
1143	90.5792	51.1447	48.1148	44.2032	49.0635	40.9439	37.2122	48.4774	16.1473	19.1008						1143		0.360555	0	0	0	0.223607			1.253	0.971876
1144	90.5792	51.1447	48.1148	43.8721	49.0158	41.2686	35.9915	48.3775	14.6586	19.2033						1144		0.1	0.316228	0.170423	0.2	0			0.223607	0.627229
1145	90.5792	51.1447	48.1148	43.5423	49.0158	41.2686	35.9915	48.0741	13.9894	19.913						1145		0	0.3	0	0.143558	0			0.2	0.759795
1146	90.5792	51.0537	48.523	42.6152	49.0158	41.371	35.6269	48.2673	13.9022	19.8017						1146		0	0.360555	0	0	0			0.447214	0.4
1147	90.5792	51.0537	48.7336	41.6072	49.0158	41.6287	35.6269	48.2643	13.1465	19.6032						1147		0	0.223607	0	0	0			0.1	0.73979
1148	escaped	51.0537	49.0017	41.4064	48.9757	41.7147	35.6269	48.2565	12.4619	18.9077						1148		0	0.608276	0	0.2064	0.1			0.1	0.559017
1149		51.0537	49.1261	41.4064	48.9757	41.7147	35.6269	47.9707	12.5147	19.805						1149		0	0.360555	0	0	0.4			0	0.542853
1150		51.0537	49.1261	41.4064	48.936	41.7147	35.6269	48.2776	12.8306	19.9031						1150		0	0.894427	0.242423	0	0			0.1	0.547507
1151		51.0537	49.1261	41.4064	48.936	41.7147	34.9518	48.5774	13.0504	19.8002						1151		0	0.1	0	0	0			0.1	0.542177
1152		51.0537	49.1261	41.2042	48.936	41.7147	34.9518	48.4812	14.2758	19.9007						1152		0	1.23693	0	0	0.424264			0.141421	0.406971
1153		51.0537	49.1261	41.0042	48.936	41.7147	34.9518	48.4704	14.4964	20.6007						1153		0	0	0.046	0	0.141421			0.2	0.474014
1154		51.0537	49.1261	40.802	49.045	41.7147	34.5474	48.4738	14.3055	20.4007						1154		0	0	0	0	0.2			0.1	0.508214
1155		51.0537	49.1261	40.1013	49.7518	41.7147	34.5474	48.1855	14.7473	21.3029						1155		0	0	0	0	0			0.3	0.271089
1156		51.0537	49.1261	40.1013	50.9597	41.7147	34.5474	48.1776	14.7782	21.6029						1156		0	0	0	0	0			0.1	0.184
1157		51.0537	49.1261	40.1013	52.1201	41.7147	34.5474	47.8778	14.8096	21.5016						1157		0	0	0	0	0			0.223607	0.275
1158		51.0537	49.5333	40.1013	52.7873	41.7147	34.5474	47.8993	14.8096	21.6001						1158		0	0	0	0	0			0.141421	0.584295
1159		51.0537	49.5333	40.1013	52.9692	41.527	34.5474	47.6995	14.7148	21.8029						1159		0	0	0.0458	0	0			0.2	0.678059
1160		51.4097	49.5333	40.1013	52.9692	41.3396	34.4108	escaped	14.747	20.9124						1160		0	0.360555	0	escaped	0			0	0.608082
1161		51.3188	49.7413	40.0027	52.8794	41.3396	34.4108		14.6856	20.3071						1161		0	0.141421	0		0.141421			0.360555	0.439874
1162		51.3188	50.0005	40.0027	52.927	41.3396	34.0981		14.4972	20.5009						1162		0	0	1.32601		0			0.1	0.627287
1163		51.3188	50.3604	40.0027	52.927	41.3396	33.8292		14.5914	20.9009						1163		0	0	0.620233		0.2			0.1	0.35141
1164		51.3188	50.3749	40.0027	52.927	41.3396	33.6056		14.8743	21.0205						1164		0	0	0.046		0			0	0.532437
1165		51.3188	50.5956	40.0027	53.0619	41.2893	33.5171		14.7799	20.9522						1165		0	escaped	0.249882		0			0.1	0.532781
