# Supplementary material for: Long-term study of behaviors of two cohabiting sea urchin species, Mesocentrotus nudus and Strongylocentrotus intermedius, under conditions of high food quantity and predation risk in situ
Source: PeerJ. 2019 Nov 22;7:e8087. doi: 10.7717/peerj.8087 (PMC6876488; doi:10.7717/peerj.8087)
Supplement: Supplemental Information 17 — The time of treatment is indicated by red color. [file peerj-07-8087-s017.xlsx]

## Sheet: Лист1
Experiment No.	0 h	4 h	8 h	12 h	16 h	20 h	21 h	22 h	23 h	24 h	25 h	26 h	27 h	28 h	29 h	30 h	31 h	32 h	33 h	37 h	41 h	45 h	49 h	53 h	57 h	61 h	65 h	69 h	73 h	77 h
Experiment 1	1.84	1.52	1.52	1.65	1.88	2.29	2.77	1.6	7.75	7.25	4.25	4.29	4.83	5.5	5	3.71	3.33	3.5	3.75	3.75	1.93	2.33	1.53	1.67	1.93	1.93	1.47	2.33	3	1.89
Experiment 2	2.46	2.38	2.13	2.31	1.73	1.58	2.33	1.63	4.67	5.4	5.8	5.2	6.5	4.8	6.25	5.75	6	4.5	4.14	3.57	3.2	2.14	2	1.85	1.92	1.92	2.7	3	2	3
Experiment 3	2.14	2.43	2.12	2.13	2.5	2.54	2.5	2.77	6	5.67	6.4	5	4.67	5.2	4.29	4.67	4	3.56	3.67	3.1	1.94	1.69	2.75	1.88	2.82	2.82	2	2.67	2.13	2.86
Experiment 4	2.13	2.57	2.71	2.77	2.06	2.12	1.55	2.64	5.8	5	6.2	8.67	3.86	3.38	3.78	3.88	3.44	3.44	2.67	2.38	1.84	1.25	2.13	2.67	2.5	2.5	2.64	2.43	2.24	3.08
	Comparison of the mean group size before (0-21 h) and after (22-33 h and 37-77h) treatment
									Kruskal-Wallis test followed by Dunn's multiple comparisons test
	0-21 h	22-33 h	37-77 h
	1.84	1.6	3.75			Table Analyzed	Data 23 - Comparison of the mean group size before (0-21 h) and after (22-33 h and 37-77h) treatment						Number of families	1
	2.46	1.63	3.57										Number of comparisons per family	3
	2.14	2.77	3.1			Kruskal-Wallis test							Alpha	0.05
	2.13	2.64	2.38			P value	< 0,0001
	1.52	7.75	1.93			Exact or approximate P value?	Approximate						Dunn's multiple comparisons test	Mean rank diff,	Significant?	Summary	Adjusted P Value
	2.38	4.67	3.2			P value summary	****
	2.43	6	1.94			Do the medians vary signif. (P < 0.05)	Yes						22-33 vs. 0-21	57.7	Yes	****	< 0,0001
	2.57	5.8	1.84			Number of groups	3						37-77 vs. 0-21	7.14	No	ns	> 0,9999
	1.52	7.25	2.33			Kruskal-Wallis statistic	68.44						37-77 vs. 22-33	-50.56	Yes	****	< 0,0001
	2.13	5.4	2.14
	2.12	5.67	1.69			Data summary
	2.71	5	1.25			Number of treatments (columns)	3						Test details	Mean rank 1	Mean rank 2	Mean rank diff,	n1	n2
	1.65	4.25	1.53			Number of values (total)	120
	2.31	5.8	2										22-33 vs. 0-21	92.5	34.8	57.7	48	28
	2.13	6.4	2.75										37-77 vs. 0-21	41.94	34.8	7.14	44	28
	2.77	6.2	2.13										37-77 vs. 22-33	41.94	92.5	-50.56	44	48
	1.88	4.29	1.67
	1.73	5.2	1.85
	2.5	5	1.88
	2.06	8.67	2.67
	2.29	4.83	1.93
	1.58	6.5	1.92
	2.54	4.67	2.82
	2.12	3.86	2.5
	2.77	5.5	1.93
	2.33	4.8	1.92
	2.5	5.2	2.82
	1.55	3.38	2.5
		5	1.47
		6.25	2.7
		4.29	2
		3.78	2.64
		3.71	2.33
		5.75	3
		4.67	2.67
		3.88	2.43
		3.33	3
		6	2
		4	2.13
		3.44	2.24
		3.5	1.89
		4.5	3
		3.56	2.86
		3.44	3.08
		3.75
		4.14
		3.67
		2.67
