# Supplementary material for: Long-term study of behaviors of two cohabiting sea urchin species, Mesocentrotus nudus and Strongylocentrotus intermedius, under conditions of high food quantity and predation risk in situ
Source: PeerJ. 2019 Nov 22;7:e8087. doi: 10.7717/peerj.8087 (PMC6876488; doi:10.7717/peerj.8087)
Supplement: Supplemental Information 18 — The data are presented as the numbers of sea urchins on the feeder and their percentages from the average number calculated as the mean of sea urchins which were present on the feeder during 21 h before the beginning of the treatment (indicated by red color). [file peerj-07-8087-s018.xlsx]

## Sheet: Лист1
Experiment No.	Mean number for 0-21 h	0 h		4 h		8 h		12 h		16 h		20 h		21 h		22 h		23 h		24 h		25 h		26 h		27 h		28 h		29 h		30 h		31 h		32 h		33 h		37 h		41 h		45 h		49 h		53 h
		Number	%	Number	%	Number	%	Number	%	Number	%	Number	%	Number	%	Number	%	Number	%	Number	%	Number	%	Number	%	Number	%	Number	%	Number	%	Number	%	Number	%	Number	%	Number	%	Number	%	Number	%	Number	%	Number	%	Number	%
Experiment 1	33	35	106.061	32	96.9697	32	96.9697	33	100	32	96.9697	32	96.9697	36	109.091	32	96.9697	31	93.9394	29	87.8788	34	103.03	30	90.9091	29	87.8788	33	100	30	90.9091	26	78.7879	30	90.9091	28	84.8485	30	90.9091	30	90.9091	29	87.8788	28	84.8485	26	78.7879	27	81.8182
Experiment 2	29.7143	32	107	31	103	32	107	29	97	26	87	30	100	28	93	31	103	28	93	27	90	29	97	26	87	26	87	24	80	25	83	23	77.4038	30	100	27	90	29	97	25	83	32	107	30	100	30	100	24	80
Experiment 3	32.4286	30	94	34	106	36	112	34	106	30	94	33	103	30	94	36	112	31	97	34	106	32	100	30	94	28	87	26	81	30	94	28	87	32	100	32	100	33	103	31	97	33	103	30	94	33	103	30	94
Experiment 4	34.8571	34	97	36	103.279	38	109.016	36	103.279	33	94	36	103.279	31	88.9344	37	106.148	29	83.1967	35	100.41	31	88.9344	26	74	27	77.459	27	77.459	34	97	31	88.9344	31	88.9344	31	88.9344	32	91	31	88.9344	35	100.41	35	100.41	34	97	32	91
			Linear regression of data on the absolute numbers of S. intermedius after crushing of heterospecifics								Linear regression of data on the relative numbers of S. intermedius after crushing of heterospecifics
		Best-fit values									Best-fit values
		Slope	-0,01455 ± 0,01545								Slope	-0,04565 ± 0,04222
		Y-intercept when X=0.0	31,27 ± 0,6453								Y-intercept when X=0.0	96,32 ± 1,763
		X-intercept when Y=0.0	2150								X-intercept when Y=0.0	2110
		1/slope	-68.75								1/slope	-21.9
		95% Confidence Intervals									95% Confidence Intervals
		Slope	-0,04516 to 0,01606								Slope	-0,1293 to 0,03796
		Y-intercept when X=0.0	30,00 to 32,55								Y-intercept when X=0.0	92,83 to 99,81
		X-intercept when Y=0.0	717,2 to +infinity								X-intercept when Y=0.0	768,6 to +infinity
		Goodness of Fit									Goodness of Fit
		R square	0.007452			Time (h)					R square	0.009813					Time (h)
		Sy.x	3.403								Sy.x	9.297
		Is slope significantly non-zero?			Linear regression of data on the absolute numbers of S. intermedius.						Is slope significantly non-zero?				Linear regression of data on the relative numbers (%) of S. intermedius.
		F	0.8859		Upside down triangle denotes the moment of treatment.						F	1.169			Upside down triangle denotes the moment of treatment.
		DFn, DFd	1,000, 118,0		Data are presented as median and range.						DFn, DFd	1,000, 118,0			Data are presented as median and range.
		P value	0.3485								P value	0.2817
		Deviation from zero?	Not Significant								Deviation from zero?	Not Significant
		Data									Data
		Number of X values	30								Number of X values	30
		Maximum number of Y replicates	4								Maximum number of Y replicates	4
		Total number of values	120								Total number of values	120
		Number of missing values	196								Number of missing values	196
		Equation	Y = -0,01455*X + 31,27								Equation	Y = -0,04565*X + 96,32
[truncated: 12 more columns]
